# Supplementary material for: A novel magnetic nanoparticle as an efficient and recyclable heterogeneous catalyst for the Suzuki cross-coupling reaction
Source: Royal Society of Chemistry journal article supplement (doi:10.1039/d4re00226a), 2024-01-01
Supplement: d4re00226a1.pdf [file d4re00226a1.pdf]

*Electronic supplementary information*

**A novel magnetic nanoparticle as an efficient and recyclable heterogeneous catalyst for suzuki cross-coupling reaction**

Hui Jin <sup>†a</sup>, Mengyu Cui <sup>†a</sup>, Peiwen Liu <sup>a</sup>, Zhuo Wang <sup>a</sup>, Tongxia Jin <sup>a</sup>, Yonghui Yang <sup>a</sup>,  
Weiping Zhu <sup>\*a</sup>, Xuhong Qian <sup>a</sup>

<sup>a</sup> State Key Laboratory of Bioreactor Engineering, Shanghai Key Laboratory of Chemical Biology, School of Pharmacy, East China University of Science and Technology, Shanghai 200237, China

<sup>†</sup> These authors contributed equally

\*E-mail: wpzhu@ecust.edu.cn

## Table of contents:

|                                                                                                                                          |    |
|------------------------------------------------------------------------------------------------------------------------------------------|----|
| 1. General Remarks.....                                                                                                                  | 3  |
| 2. Synthesis of $\text{Fe}_3\text{O}_4@\text{FSM}@\text{Pd}$ .....                                                                       | 3  |
| 3. Characterization of $\text{Fe}_3\text{O}_4@\text{FSM}@\text{Pd}$ .....                                                                | 5  |
| 4. General Procedure for Suzuki-Miyaura Cross-Coupling Catalyzed by $\text{Fe}_3\text{O}_4@\text{FSM}@\text{Pd}$ .....                   | 6  |
| 5. Study on the conditions of catalytic activity of different heterocyclic substrates .....                                              | 7  |
| 6. Catalyst Recycling and Reuse.....                                                                                                     | 7  |
| 7. Maitlis' filtration test .....                                                                                                        | 8  |
| 8. Kinetic experiment of catalytic reaction .....                                                                                        | 8  |
| 9. Phase trajectory test .....                                                                                                           | 9  |
| 10. Spectroscopic data of fluorescence probe .....                                                                                       | 10 |
| 11. $^1\text{H}$ NMR and $^{13}\text{C}$ NMR spectra of fluorescence probe .....                                                         | 14 |
| 12. Spectroscopic data of coupling products .....                                                                                        | 29 |
| 13. $^1\text{H}$ NMR and $^{13}\text{C}$ NMR spectra of coupling products.....                                                           | 35 |
| 14. Spectroscopic data of API intermediates .....                                                                                        | 79 |
| 15. $^1\text{H}$ NMR, $^{13}\text{C}$ NMR and HRMS spectra of API intermediates .....                                                    | 81 |
| 16. Comparison of the results obtained from $\text{Fe}_3\text{O}_4@\text{FSM}@\text{Pd}$ and those reported with other Pd catalyst ..... | 96 |
| 17. References.....                                                                                                                      | 96 |

## 1. General Remarks

All the solvents used in this experiment are commercially available for analysis. In the absence of special instructions, it means that there is no need for any treatment or purification before use. Sodium dichromate, nitric acid, sulfuric acid and tetraethyl orthosilicate (TEOS) were all purchased from National Pharmaceutical Group Chemical Reagent Co., Ltd., acenaphthene, diglycolamine, cuprous iodide and propyl triethoxysilane isocyanate were all purchased from Shanghai Aladdin Biochemical Technology Co., Ltd., N-bromosuccinamide (NBS), tetraphenylphosphine palladium, 2-aminomethylthiophene, cetyltrimethylammonium bromide (CTAB), palladium chloride, inorganic base. Organic base and silica gel used for column chromatography (300-400 mesh) were purchased from Shanghai Titan Technology Co., Ltd. Halogenated aromatic hydrocarbons and their derivatives, phenylboronic acid and their derivatives used in Suzuki-Miyaura coupling reaction were purchased from Shanghai Bide Pharmaceutical Technology Co., Ltd.

The nuclear magnetic resonance spectra ( $^1\text{H-NMR}$  and  $^{13}\text{C-NMR}$ ) for the structural analysis of the compounds were collected by Bruker- AVANCE III 400 MHz nuclear magnetic resonance (TMS internal standard), the high-resolution mass spectrometry was provided by mass spectrometer Waters XEVO G2 TOF (ESI source, and the mass spectra of Suzuki-Miyaura coupling products were collected from gas chromatography-mass spectrometry (GC-MS). The infrared spectrum was measured by Thermo Fisher-Nicolet 6700. The palladium content was measured by plasma emission spectrometer Agilent ICP-OES 725. The elemental analysis of the sample was obtained by German Elementar Vario EL III element analyzer, the morphology images were obtained by transmission electron microscope JEOL JEM 2100 F, the element valence on the surface of the sample was characterized by X-ray photoelectron spectroscopy Thermo Fisher 6700 Xi, and the crystal structure of the sample was measured by X-ray diffractometer Bruker D8 Advance. The hysteresis loop of the sample is obtained by vibrating sample magnetometer Lake Shore 7404.

## 2. Synthesis of $\text{Fe}_3\text{O}_4@\text{FSM}@\text{Pd}$

### Synthesis and characterization of Palladium Ion fluorescence probe FP1

The synthesis route of palladium ion fluorescence probe<sup>1</sup> is obtained from raw material acenaphthene FP8 through seven-step reactions. The key intermediate N-(2-(2-hydroxyethoxy) ethyl)-4-bromo-5-nitro-1-naphthalimide FP4 was prepared by bromination, nitration, oxidation of sodium dichromate and

reaction with diglycolamine. Then it was modified with 2-aminomethylthiophene and p-alkynyl anisole to prepare the palladium ion fluorescence probe FP2. Finally, FP2 was modified by propyl triethoxysilane isocyanate to prepare FP1, which bind to the silane on the surface of magnetic nanomaterials. The intermediates and products were characterized by  $^1\text{H-NMR}$ ,  $^{13}\text{C-NMR}$  and some of them were characterized by mass spectrometry.

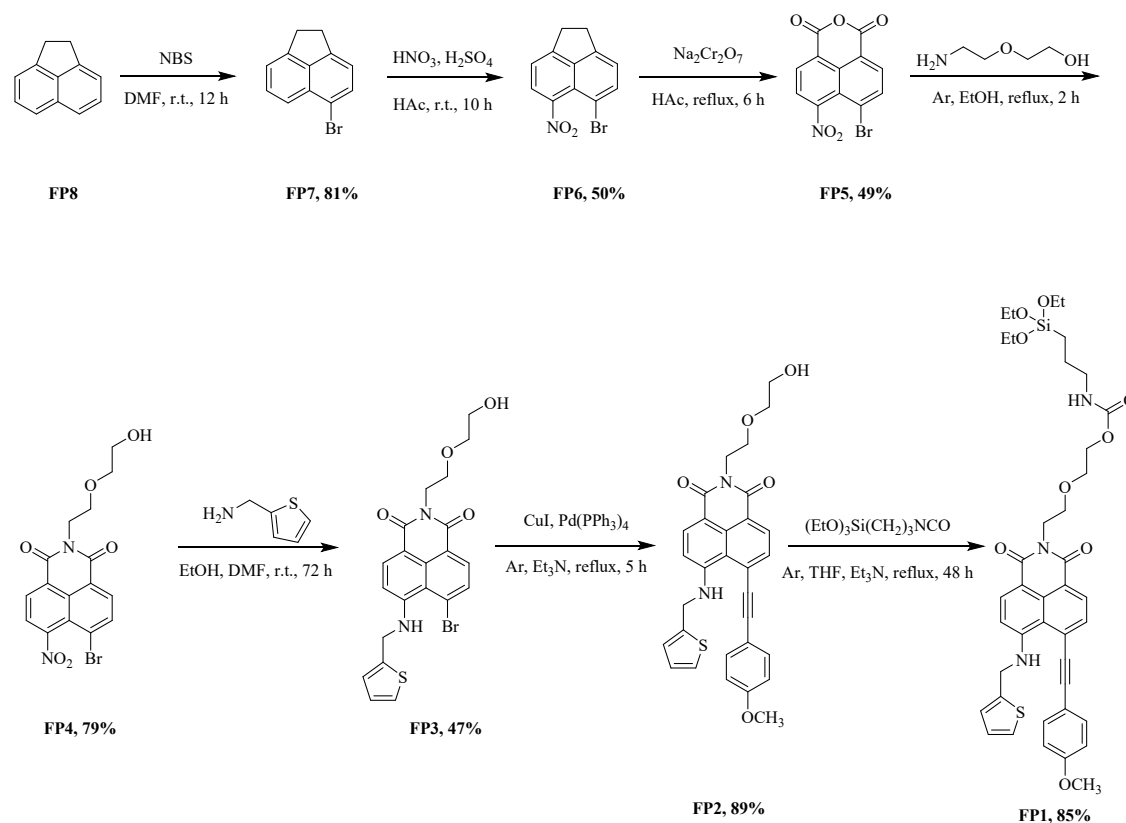

**Scheme S1.** The synthesis route of palladium ion fluorescence probe FP1.

### Synthesis of $\text{Fe}_3\text{O}_4@\text{SiO}_2$

To a stirred solution of  $\text{FeCl}_3 \cdot 6\text{H}_2\text{O}$  (2 g, 7.4 mmol) in 35 mL ethylene glycol was added anhydrous sodium acetate (2 g, 24.4 mmol). The mixture was stirred at room temperature for 0.5 h and 200 °C for 8 h. The supernatant was removed by centrifugation, washed with ethanol for three times, and dried in an infrared oven to obtain nanometer ferric oxide (nano  $\text{Fe}_3\text{O}_4$ ). Next, to a stirred solution of cetyltrimethyl ammonium bromide (CTAB, 1.5 g, 3.8 mmol) in 10 mL water was added the above nano  $\text{Fe}_3\text{O}_4$  (200 mg). The mixture was mechanically stirred at 60 °C for 0.5 h. To a mechanically stirred mixture were slowly added 2M NaOH aqueous solution (60 mL) and tetraethyl orthosilicate (TEOS, 2

mL) at 70 °C for 3 h. The solid crude product was magnetically separated, and was washed with ethanol for three times, and then dried in an infrared oven to give magnetic nanomaterials ( $\text{Fe}_3\text{O}_4@\text{SiO}_2$ ).

### Synthesis of $\text{Fe}_3\text{O}_4@\text{FSM}$

A mixture of Silanization probe FP1 (10 mg, 0.01 mmol) and dried and activated  $\text{Fe}_3\text{O}_4@\text{SiO}_2$  (particle size about 100 nm) in anhydrous ethanol (20 mL) was stirred at and refluxed for 72 h under argon. After stopping the reaction, the solid crude product was magnetically separated, and washed with ethanol until the supernatant was no fluorescence, and then dried in an infrared oven to give the black solid ( $\text{Fe}_3\text{O}_4@\text{FSM}$ ).

### Synthesis of $\text{Fe}_3\text{O}_4@\text{FSM}@Pd$

To a stirred aqueous solution of 10 M palladium chloride ( $\text{PdCl}_2$ , 100 mL) was added  $\text{Fe}_3\text{O}_4@\text{FSM}$  (2 g). The mixture was stirred at room temperature for 3 h. The solid crude product was magnetically separated, and washed with water for three times, and then drying in infrared oven to give the black solid ( $\text{Fe}_3\text{O}_4@\text{FSM}@Pd$ ).

## 3. Characterization of $\text{Fe}_3\text{O}_4@\text{FSM}@Pd$

### FT-IR characterization

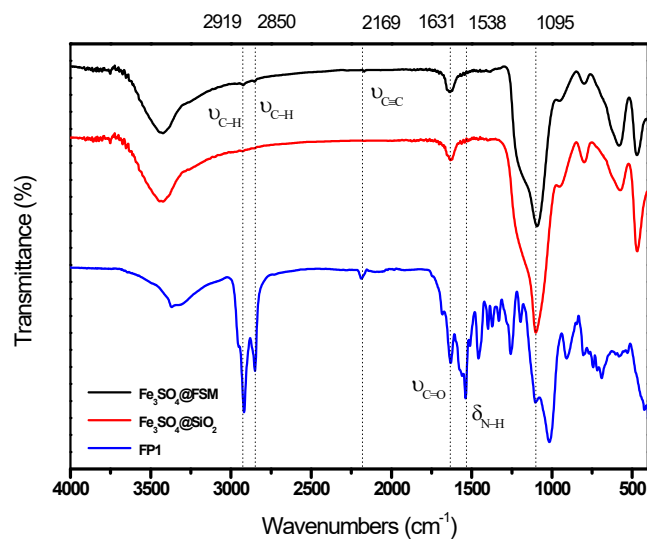

**Fig. S1.** The FT-IR spectra of FP1,  $\text{Fe}_3\text{O}_4@\text{SiO}_2$  and  $\text{Fe}_3\text{O}_4@\text{FSM}$ .

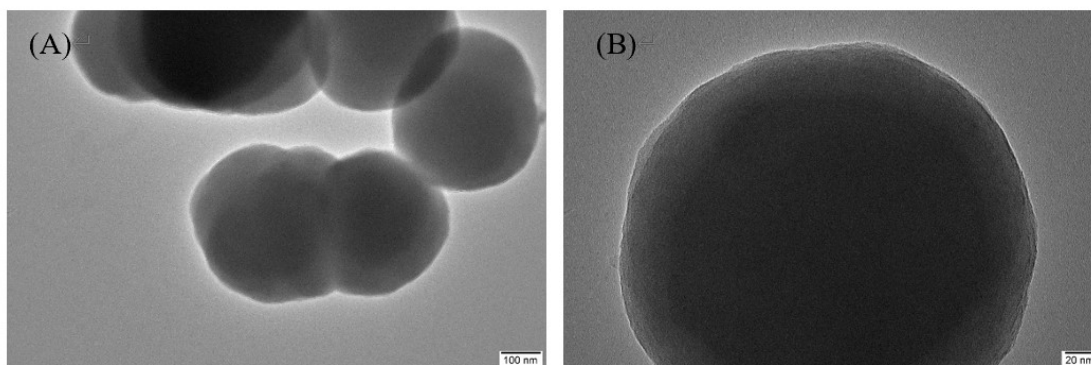

**TEM characterization**

**Fig. S2.** The TEM images of  $\text{Fe}_3\text{O}_4@\text{FSM}$ .

**DLS characterization**

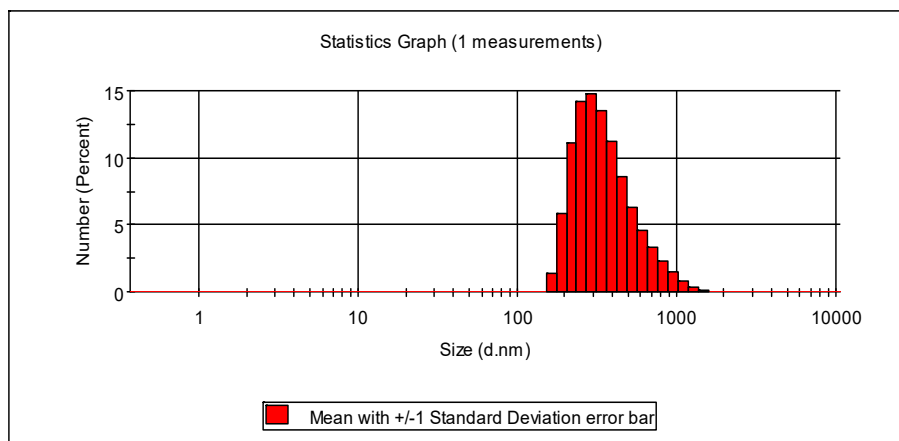

**Fig. S3.** The DLS image of  $\text{Fe}_3\text{O}_4@\text{FSM}$ .

#### **4. General Procedure for Suzuki-Miyaura Cross-Coupling Catalyzed by $\text{Fe}_3\text{O}_4@\text{FSM}@\text{Pd}$**

Halogenated aromatic hydrocarbons (1.0 mmol), phenylboronic acid or their derivatives (1.5 mmol), catalyst  $\text{Fe}_3\text{O}_4@\text{FSM}@\text{Pd}$  (5 mg, 0.1 mol%), *N,N*-diisopropylamine ((*i*-Pr)<sub>2</sub>NH, 0.35 mL, 2.5mmol) were mixed in pure water (2 mL). The mixture was stirred at 100 °C for 30 min under air. The catalyst was separated and recovered from the reaction solution by external magnetic field. The crude product was diluted with dichloromethane, washed with water, dried (anhydrous  $\text{Na}_2\text{SO}_4$ ), filtered, and concentrated under reduced pressure. The crude product was purified by silica gel column chromatography (petroleum ether/ ethyl acetate = 100/1, v/v) to give products as the white powdery solid. The products were confirmed by <sup>1</sup>H-NMR and <sup>13</sup>C-NMR.

## 5. Study on the conditions of catalytic activity of different heterocyclic substrates

Halogenated aromatic hydrocarbons (1.0 mmol), Heteroarylboronic acid (1.5 mmol), catalyst  $\text{Fe}_3\text{O}_4@\text{FSM}@\text{Pd}$  (5 mg, 0.1 mol%), *N,N*-diisopropylamine ( $(i\text{-Pr})_2\text{NH}$ , 0.35 mL, 2.5 mmol) were mixed in pure water (2 mL). The mixture was stirred at 100 °C for 30 min under air. The catalyst was separated and recovered from the reaction solution by external magnetic field. The crude product was diluted with dichloromethane, washed with water, dried (anhydrous  $\text{Na}_2\text{SO}_4$ ), filtered, and concentrated under reduced pressure. The crude product was purified by silica gel column chromatography (petroleum ether/ethyl acetate = 100/1, v/v) to give products as the white powdery solid. The products were confirmed by  $^1\text{H-NMR}$  and  $^{13}\text{C-NMR}$ .

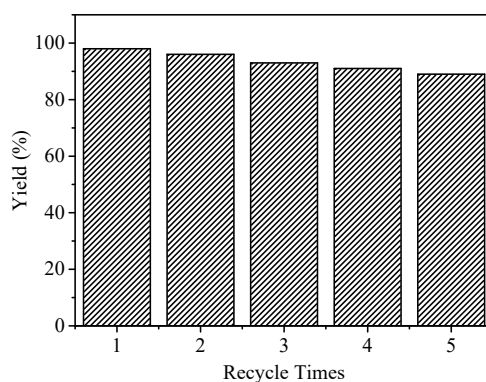

## 6. Catalyst Recycling and Reuse

**Fig. S4.** Recyclability of  $\text{Fe}_3\text{O}_4@\text{FSM}@\text{Pd}$ .

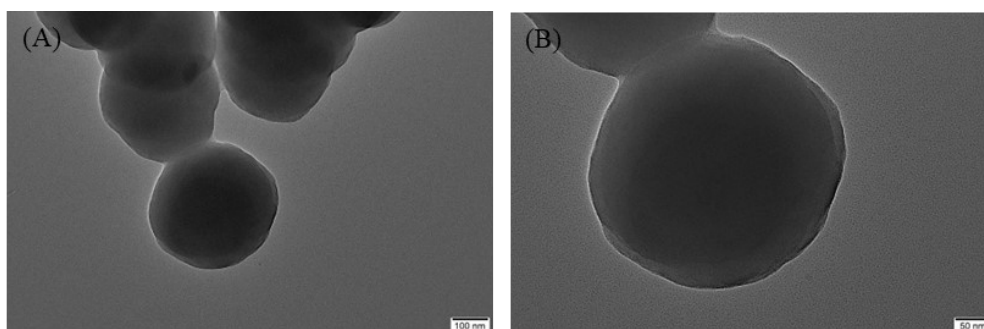

**Fig. S5.** The TEM images of the recycled  $\text{Fe}_3\text{O}_4@\text{FSM}@\text{Pd}$ .

**Table S1** Elemental analysis results of unused  $\text{Fe}_3\text{O}_4@\text{FSM}@\text{Pd}$  and recycled  $\text{Fe}_3\text{O}_4@\text{FSM}@\text{Pd}$ .

| Sample                                              | N (%) | C (%) | H (%) | S (%) |
|-----------------------------------------------------|-------|-------|-------|-------|
| Fe <sub>3</sub> O <sub>4</sub> @FSM@Pd <sup>a</sup> | 0.78  | 3.80  | 1.35  | 0.16  |
| Fe <sub>3</sub> O <sub>4</sub> @FSM@Pd <sup>b</sup> | 0.62  | 3.42  | 1.34  | 0.17  |

<sup>a</sup> unused Fe<sub>3</sub>O<sub>4</sub>@FSM@Pd. <sup>b</sup> The catalyst Fe<sub>3</sub>O<sub>4</sub>@FSM@Pd was reused 5 time.

4-bromoanisole (125  $\mu$ L, 1.0 mmol), phenylboronic acid (183 mg, 1.5 mmol), catalyst Fe<sub>3</sub>O<sub>4</sub>@FSM@Pd (5 mg, 0.1 mol%), *N, N*-diisopropylamine ((*i*-Pr)<sub>2</sub>NH, 0.35 mL, 2.5 mmol) were mixed in pure water (2 mL). The mixture was stirred at 100 °C for 30 min under air. The catalyst was separated and recovered from the reaction solution by external magnetic field. The catalyst was separated and recovered from the reaction solution by external magnetic field. The crude product was diluted with dichloromethane, washed with water, dried (anhydrous Na<sub>2</sub>SO<sub>4</sub>), filtered, and concentrated under reduced pressure. The crude product was purified by silica gel column chromatography (petroleum ether/ ethyl acetate = 100/1, v/v) to give products as the white powdery solid. Wash the catalyst with water and ethanol at the end of each reaction, and then use it for the next time after drying in the infrared oven. The catalyst can be reused for 5 times without a significant loss of activity. The product was confirmed by <sup>1</sup>H-NMR, <sup>13</sup>C-NMR and gas chromatography-mass spectrometry (GC-MS).

### 7. Maitlis' filtration test

Firstly, 4-bromoanisole (125  $\mu$ L, 1.0 mmol), phenylboronic acid (183 mg, 1.5 mmol), catalyst Fe<sub>3</sub>O<sub>4</sub>@FSM@Pd (5 mg, 0.1 mol%), *N, N*- diisopropylamine ((*i*-Pr)<sub>2</sub>NH, 0.35 mL, 2.5 mmol), were mixed in pure water (2mL). The mixture was stirred at 100 °C for 10 min under air. The catalyst was separated from the reaction solution by an external magnetic field, and then the reaction solution was stirred at 100 °C for 1 h under air. The crude product was diluted with dichloromethane, washed with water, dried (anhydrous Na<sub>2</sub>SO<sub>4</sub>), filtered, and concentrated under reduced pressure. The crude product was purified by silica gel column chromatography (petroleum ether/ ethyl acetate = 100/1, v/v) to give products as the white powdery solid.

Secondly, the catalyst Fe<sub>3</sub>O<sub>4</sub>@FSM@Pd (5 mg, 0.1 mol%) and *N, N*-diisopropylamine ((*i*-Pr)<sub>2</sub>NH, 0.35 mL, 2.5 mmol) were mixed in pure water (2 mL). The mixture was stirred at 100 °C for 30 min under air. The catalyst was separated from the reaction solution by an external magnetic field, and then 4-bromoanisole (125  $\mu$ L, 1.0 mmol) and phenylboronic acid (183 mg, 1.5 mmol) were added to the filtrate. The mixture was stirred at 100 °C for 30 min under air. The crude product was diluted with



dichloromethane, washed with water, dried (anhydrous  $\text{Na}_2\text{SO}_4$ ), filtered, and concentrated under reduced pressure. The crude product was purified by silica gel column chromatography (petroleum ether/ ethyl acetate = 100/1, v/v) to give products as the white powdery solid.

### 8. Kinetic experiment of catalytic reaction

The three mixtures of 4-bromoanisole (125  $\mu\text{L}$ , 1.0 mmol), phenylboronic acid (183 mg, 1.5 mmol), N, N-diisopropylamine ((i-Pr) $_2$ NH, 0.35 mL, 2.5 mmol) in pure water (2 mL) were added with different amounts of catalyst  $\text{Fe}_3\text{O}_4@\text{FSM}@\text{Pd}$  (5 mg, 0.1 mol%; 10 mg, 0.2 mol%, 25 mg, 0.5 mol%, respectively). The three mixtures were stirred at 100 °C for 5 min, 10 min, 15 min, 20 min, 25 min and 30 min respectively under air. The catalyst was separated and recovered from the reaction solution by external magnetic field. The crude product was diluted with dichloromethane, washed with water, dried (anhydrous  $\text{Na}_2\text{SO}_4$ ), filtered, and concentrated under reduced pressure. The crude product was purified by silica gel column chromatography (petroleum ether/ ethyl acetate = 100/1, v/v) to give products as the white powdery solid. The product was confirmed by  $^1\text{H-NMR}$  and  $^{13}\text{C-NMR}$ .

### 9. Phase trajectory test

Phenylboronic acid (366 mg, 3.0 mmol), catalyst  $\text{Fe}_3\text{O}_4@\text{FSM}@\text{Pd}$  (10 mg, 0.2 mol%) or palladium acetate ( $\text{Pd}(\text{OAc})_2$ , 0.2 mg, 0.2 mol%) and N, N-diisopropylamine ((i-Pr) $_2$ NH, 0.7 mL, 5.0 mmol) were mixed in pure water (4 mL). To a stirred of mixtures were added bromobenzene (0.15 mL, 1.0 mmol) and 4-bromoacetophenone (199 mg, 1.0 mmol) at 100 °C for different times under air. The catalyst was separated and recovered from the reaction solution by an external magnetic field. The crude product was diluted with dichloromethane, washed with water, dried (anhydrous  $\text{Na}_2\text{SO}_4$ ), filtered, and concentrated under reduced pressure. The crude product was purified by silica gel column chromatography (petroleum ether/ ethyl acetate = 100/1, v/v) to give products as the white powdery solid. The phase trajectory curves of the two catalysts were compared with the isolated yields of the two products.

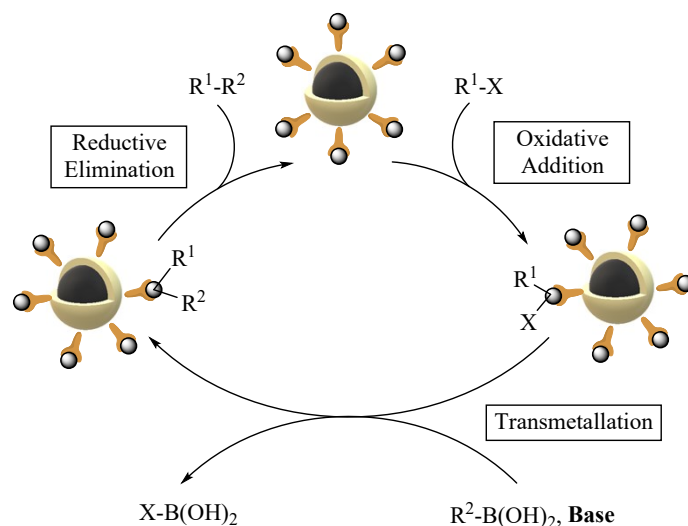

**Fig. S6.** The proposed mechanism for  $\text{Fe}_3\text{O}_4@\text{FSM}@\text{Pd}$  in Suzuki reaction.

## 10. Spectroscopic data of fluorescence probe

**FP7:**

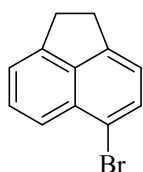

Light yellow solid.  $^1\text{H}$  NMR (400 MHz,  $\text{CDCl}_3$ ):  $\delta$  7.74 (d,  $J = 8.4$  Hz, 1H),  $\delta$  7.61 (d,  $J = 7.2$  Hz, 1H), 7.52 (t,  $J = 8.4$  Hz, 1H), 7.50 (t,  $J = 8.4$  Hz, 1H), 7.28 (t,  $J = 6.8$  Hz, 1H), 7.08 (t,  $J = 7.6$  Hz, 1H), 3.38-3.34 (m, 2H), 3.29-3.26 (m, 2H).  $^{13}\text{C}$  NMR (100 MHz,  $\text{CDCl}_3$ ):  $\delta$  146.27, 145.98, 140.29, 130.90, 129.08, 121.77, 120.20, 120.07, 116.80, 30.65, 29.94.

**FP6:**

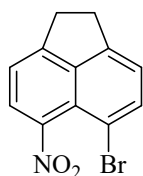

Yellow solid.  $^1\text{H}$  NMR (400 MHz,  $\text{CDCl}_3$ ):  $\delta$  7.82 (d,  $J = 7.6$  Hz, 1H), 7.71 (t,  $J = 7.6$  Hz, 1H), 7.29 (t,  $J = 7.2$  Hz, 1H), 7.25 (t,  $J = 7.2$  Hz, 1H), 3.46-3.37 (m, 4H).  $^{13}\text{C}$  NMR (100 MHz,  $\text{CDCl}_3$ ):  $\delta$  151.41, 146.49, 144.74, 141.22, 136.25, 125.36, 122.23, 121.39, 118.83, 111.58, 30.61, 30.16.

**FP5:**

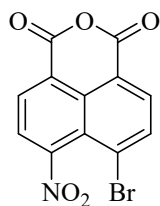

Reddish brown solid.  $^1\text{H}$  NMR (400 MHz,  $\text{DMSO-}d_6$ ):  $\delta$  8.68 (d,  $J = 7.6$  Hz, 1H), 8.48-8.842 (m, 3H).

$^{13}\text{C}$  NMR (100 MHz,  $\text{DMSO-}d_6$ ):  $\delta$  160.23, 159.62, 160.98, 136.91, 133.65, 132.92, 132.64, 125.11, 123.92, 123.88, 120.57, 120.43

**FP4:**

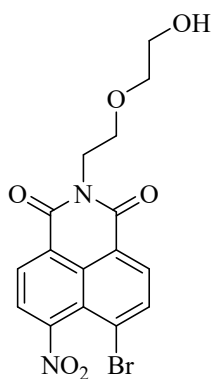

Brown solid.  $^1\text{H}$  NMR (400 MHz,  $\text{DMSO-}d_6$ ):  $\delta$  8.63 (d,  $J = 8.0$  Hz, 1H), 8.44-8.36 (m, 3H), 4.53 (m, 1H), 4.23 (t,  $J = 6.4$  Hz, 2H), 3.67 (t,  $J = 6.4$  Hz, 2H), 3.47 (s, 4H).  $^{13}\text{C}$  NMR (100 MHz,  $\text{DMSO-}d_6$ ):  $\delta$  162.98, 162.27, 150.61, 136.66, 132.38, 131.53, 130.39, 126.14, 124.87, 122.96, 120.24, 72.60, 67.11, 60.64.

**FP3:**

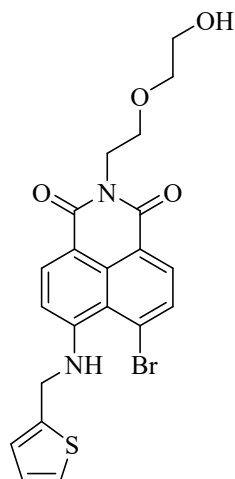

Brown solid.  $^1\text{H}$  NMR (400 MHz,  $\text{DMSO-}d_6$ ):  $\delta$  8.22 (d,  $J = 8.4$  Hz, 1H), 8.15 (d,  $J = 8.0$  Hz, 1H), 8.05 (t,  $J = 5.6$  Hz, 1H), 8.90 (d,  $J = 8.0$  Hz, 1H), 7.47 (d,  $J = 5.2$  Hz, 1H), 7.23 (d,  $J = 4.4$  Hz, 1H), 7.04 (t,  $J = 4.0$  Hz, 1H), 6.94 (d,  $J = 8.8$  Hz, 1H), 4.85 (d,  $J = 5.6$  Hz, 2H), 4.58 (s, 1H), 4.16 (t,  $J = 6.4$  Hz, 2H), 3.61 (t,  $J = 6.4$  Hz, 2H), 3.46 (s, 4H).  $^{13}\text{C}$  NMR (100 MHz,  $\text{DMSO-}d_6$ ):  $\delta$  163.58, 162.95, 149.99, 141.08, 134.45, 132.54, 132.01, 131.42, 127.57, 126.74, 126.04, 125.07, 122.02, 117.81, 109.63, 107.41, 72.55, 67.37, 60.65, 42.66, 39.02 .

**FP2:**

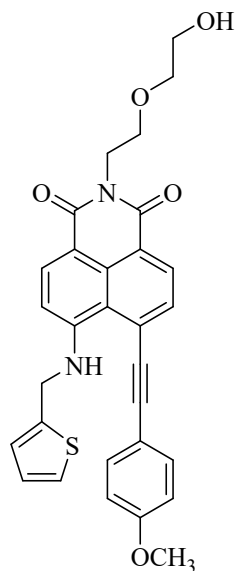

Red solid.  $^1\text{H}$  NMR (400 MHz,  $\text{CDCl}_3$ ):  $\delta$  8.39-8.35 (m, 2H), 8.32 (d,  $J = 8.8$  Hz, 1H), 7.88 (d,  $J = 7.6$  Hz, 1H), 7.52 (d,  $J = 4.4$  Hz, 1H), 7.31 (d,  $J = 2.8$  Hz, 1H), 7.16 (d,  $J = 8.8$  Hz, 2H), 7.08-7.06 (m, 1H), 6.99 (d,  $J = 8.8$  Hz, 1H), 6.94 (d,  $J = 8.8$  Hz, 2H), 4.86 (d,  $J = 4.4$  Hz, 2H), 4.58 (t,  $J = 6.0$  Hz, 1H), 4.19

(t,  $J = 6.4$  Hz, 2H), 3.82 (s, 3H), 3.63 (t,  $J = 6.4$  Hz, 2H), 3.47 (d,  $J = 2.4$  Hz, 4H).  $^{13}\text{C}$  NMR (100 MHz,  $\text{CDCl}_3$ ):  $\delta$  164.57, 164.23, 160.63, 150.33, 138.95, 134.94, 133.06, 131.96, 130.86, 130.25, 127.24, 126.06, 124.08, 122.06, 118.48, 114.24, 113.17, 110.17, 105.26, 101.19, 88.24, 72.28, 68.66, 61.91, 55.43, 43.11, 39.37.

**FP1:**

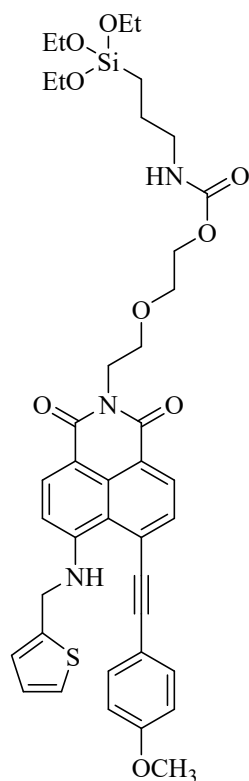

Red solid.  $^1\text{H}$  NMR (400 MHz,  $\text{CDCl}_3$ ):  $\delta$  8.52-8.48 (m, 3H), 7.78 (d,  $J = 7.6$  Hz, 1H), 7.24 (dd,  $J = 4.8$ , 1.2 Hz, 1H), 7.17 (d,  $J = 3.6$  Hz, 1H), 7.02 (d,  $J = 8.8$  Hz, 2H), 6.98 (dd,  $J = 5.2$ , 3.2 Hz, 1H), 6.81-6.78 (m, 3H), 5.02 (s, 1H), 4.75 (d,  $J = 4.4$  Hz, 2H), 4.42 (t,  $J = 6.4$  Hz, 2H), 4.18 (t,  $J = 4.4$  Hz, 2H), 3.85-3.80 (m, 3H), 3.74-3.72 (t,  $J = 4.4$  Hz, 2H), 3.14 (q,  $J = 6.4$  Hz, 2H), 1.25-1.19 (m, 9H), 0.87 (q,  $J = 6.4$  Hz, 2H), 0.62 (q,  $J = 8.0$  Hz, 2H).  $^{13}\text{C}$  NMR (100 MHz,  $\text{CDCl}_3$ ):  $\delta$  163.31, 162.96, 161.54, 159.61, 155.39, 149.30, 138.00, 133.80, 132.03, 130.98, 129.91, 129.16, 126.20, 125.00, 123.01, 121.22, 117.61, 113.22, 112.17, 109.31, 104.22, 100.09, 87.19, 68.13, 66.96, 63.13, 57.44, 57.42, 54.39, 54.37, 42.44, 42.10, 37.82, 35.47, 30.41, 28.68, 22.27, 17.41, 17.27, 6.57. MS (HR-ESI)  $m/z$ , calcd. For  $[\text{C}_{40}\text{H}_{47}\text{N}_3\text{O}_9\text{SSi} + \text{Na}^+]$  796.2694, found 796.2691.

### 11. <sup>1</sup>H NMR and <sup>13</sup>C NMR spectra of fluorescence probe

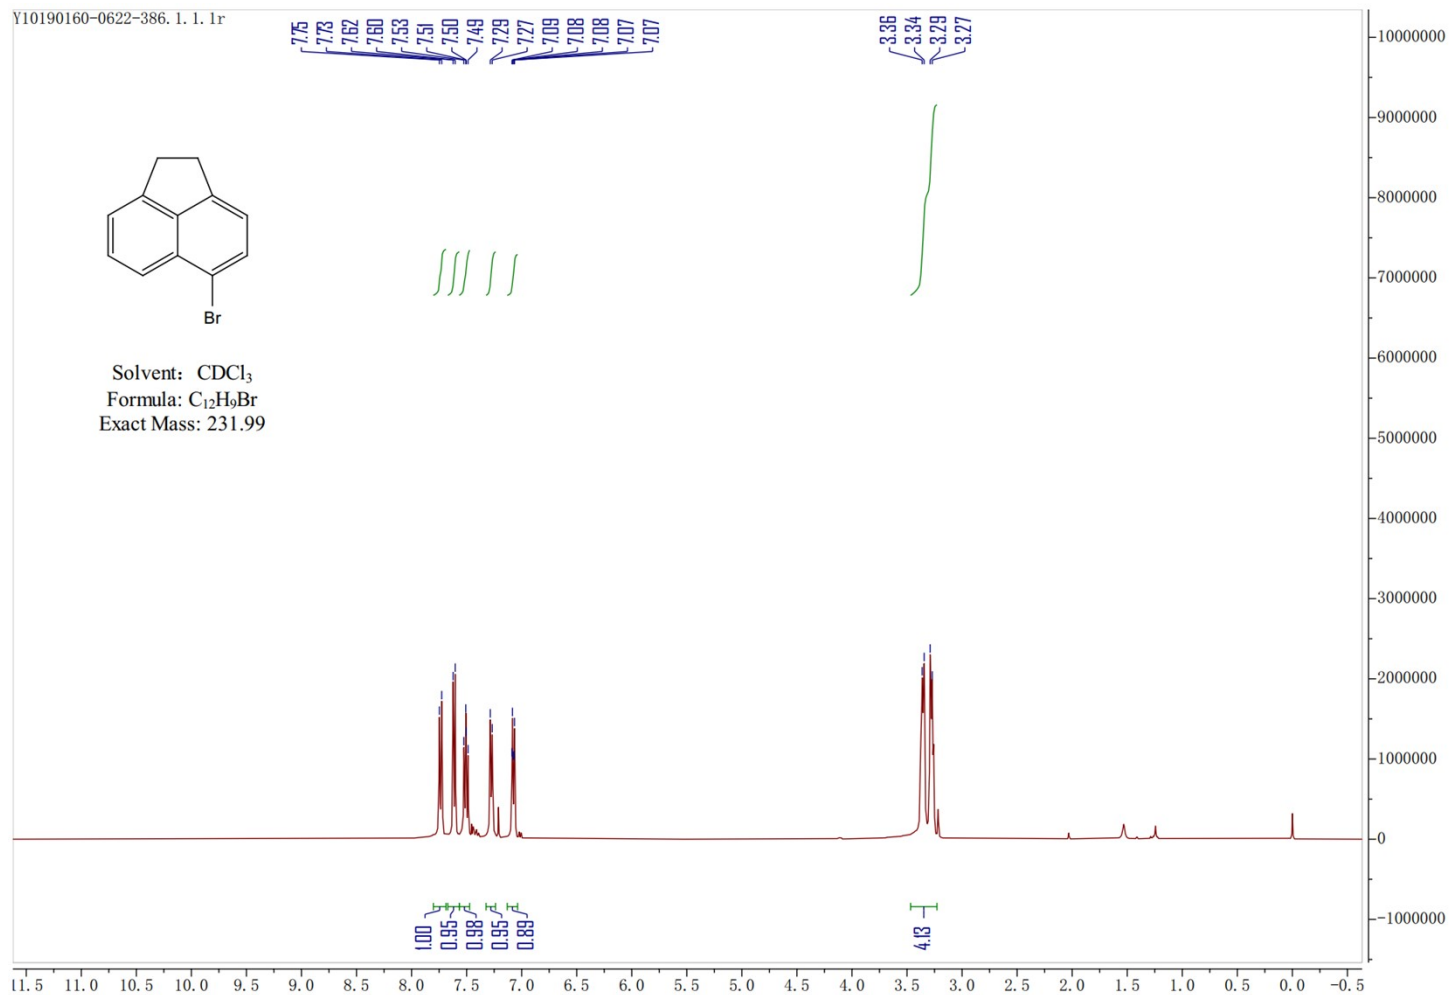

Fig. S7. The <sup>1</sup>H NMR spectrum of FP7

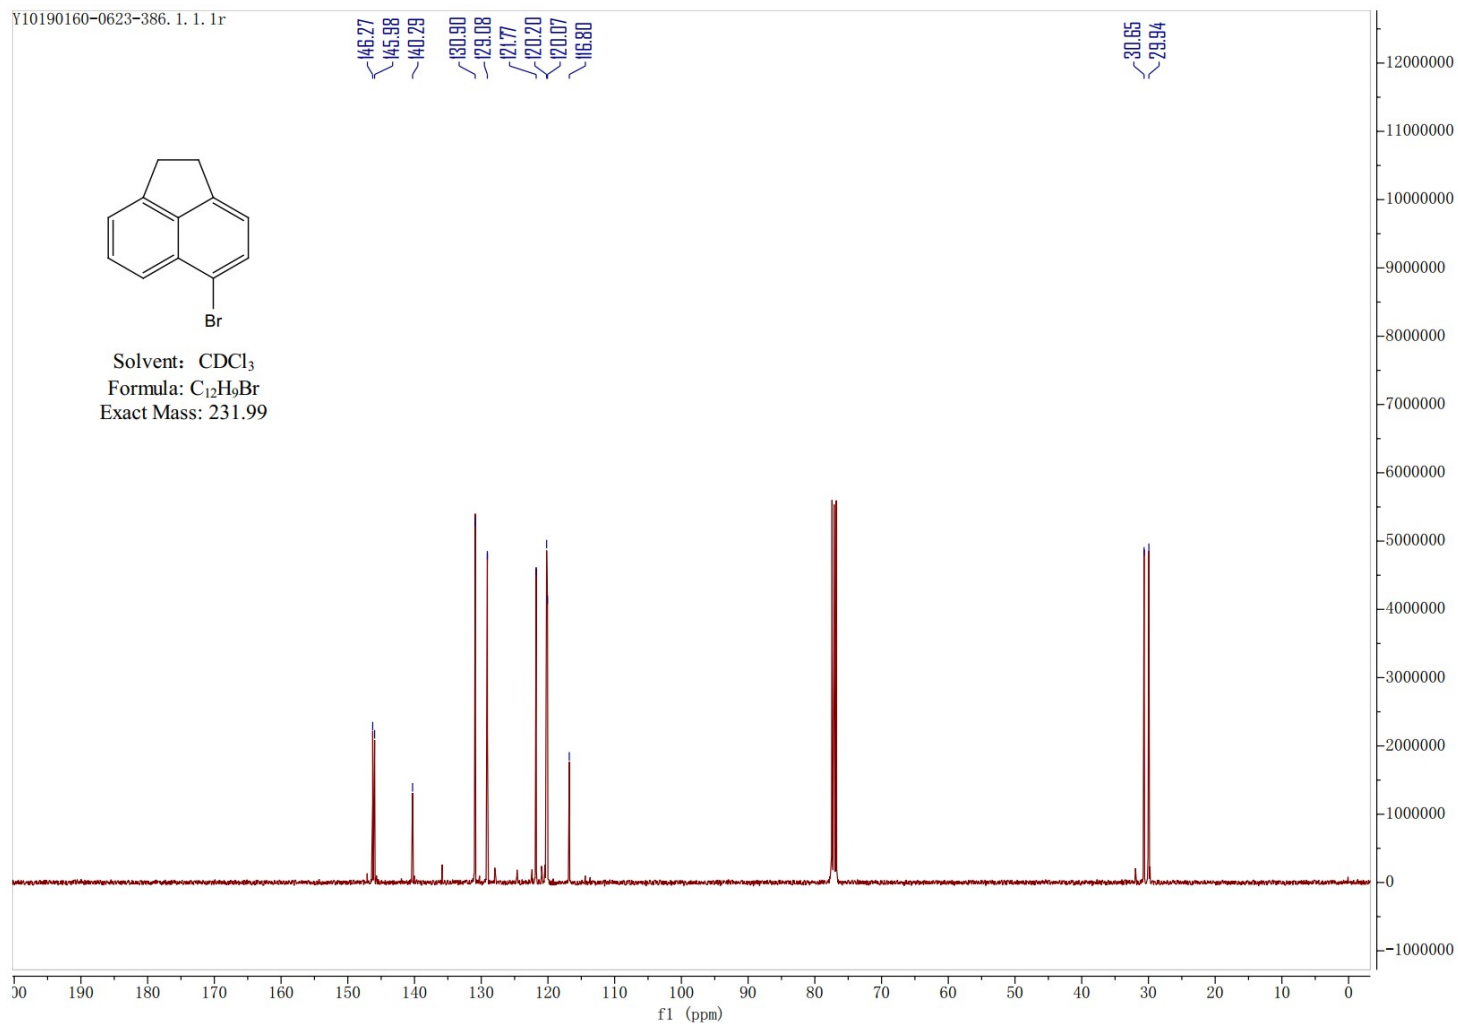

**Fig. S8.** The <sup>13</sup>C NMR spectrum of FP7

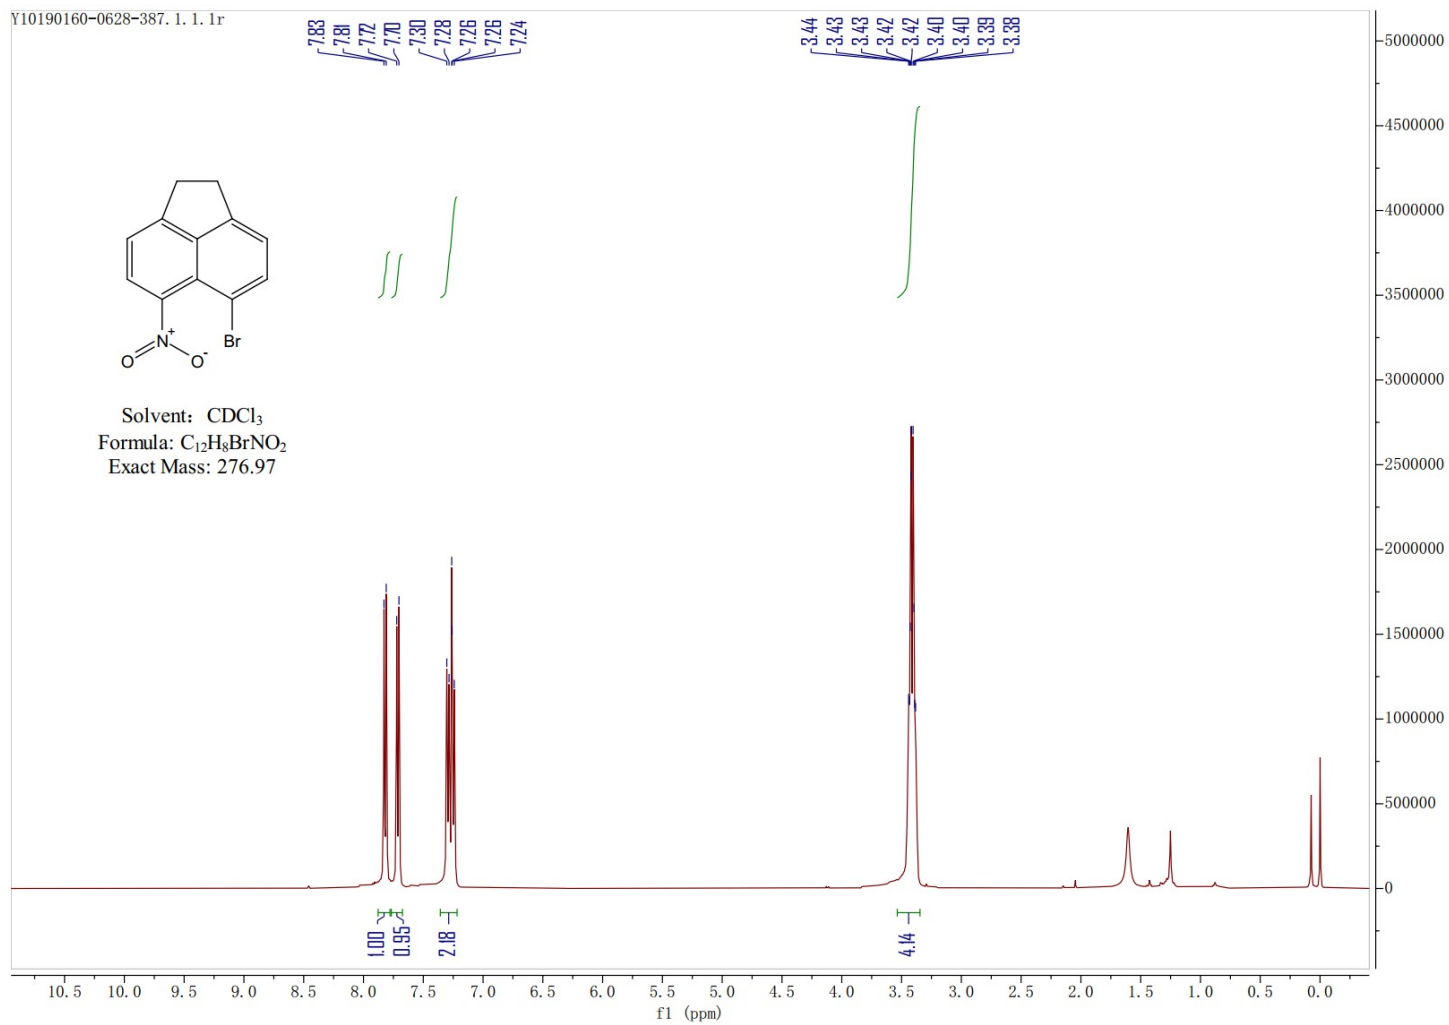

Fig. S9. The <sup>1</sup>H NMR spectrum of FP6



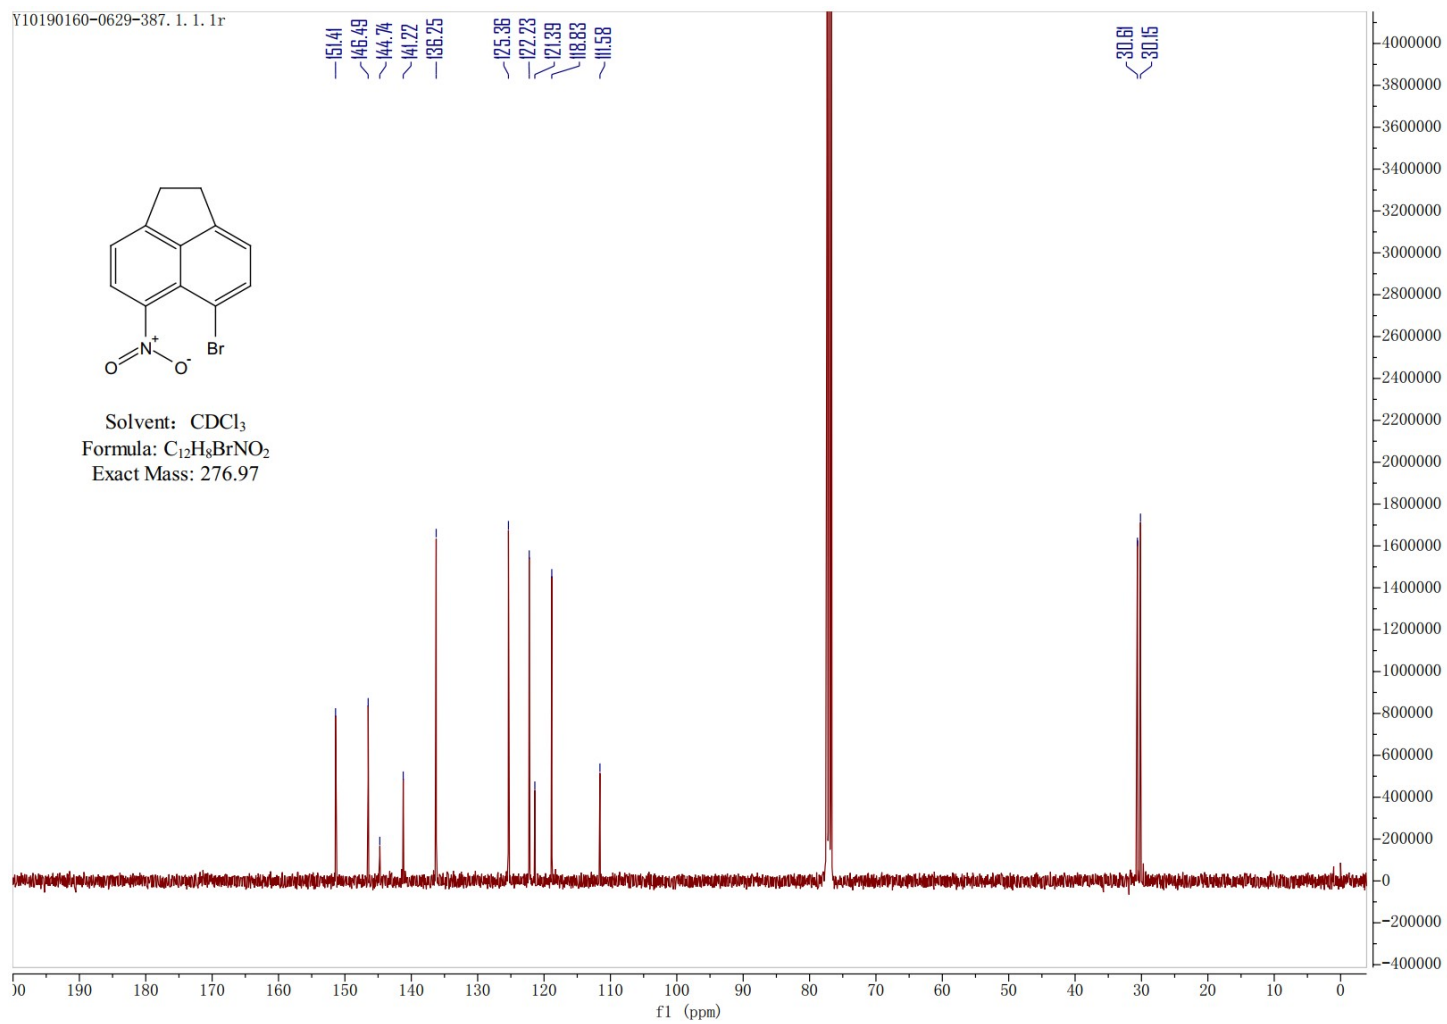

Fig. S10. The <sup>13</sup>C NMR spectrum of FP6

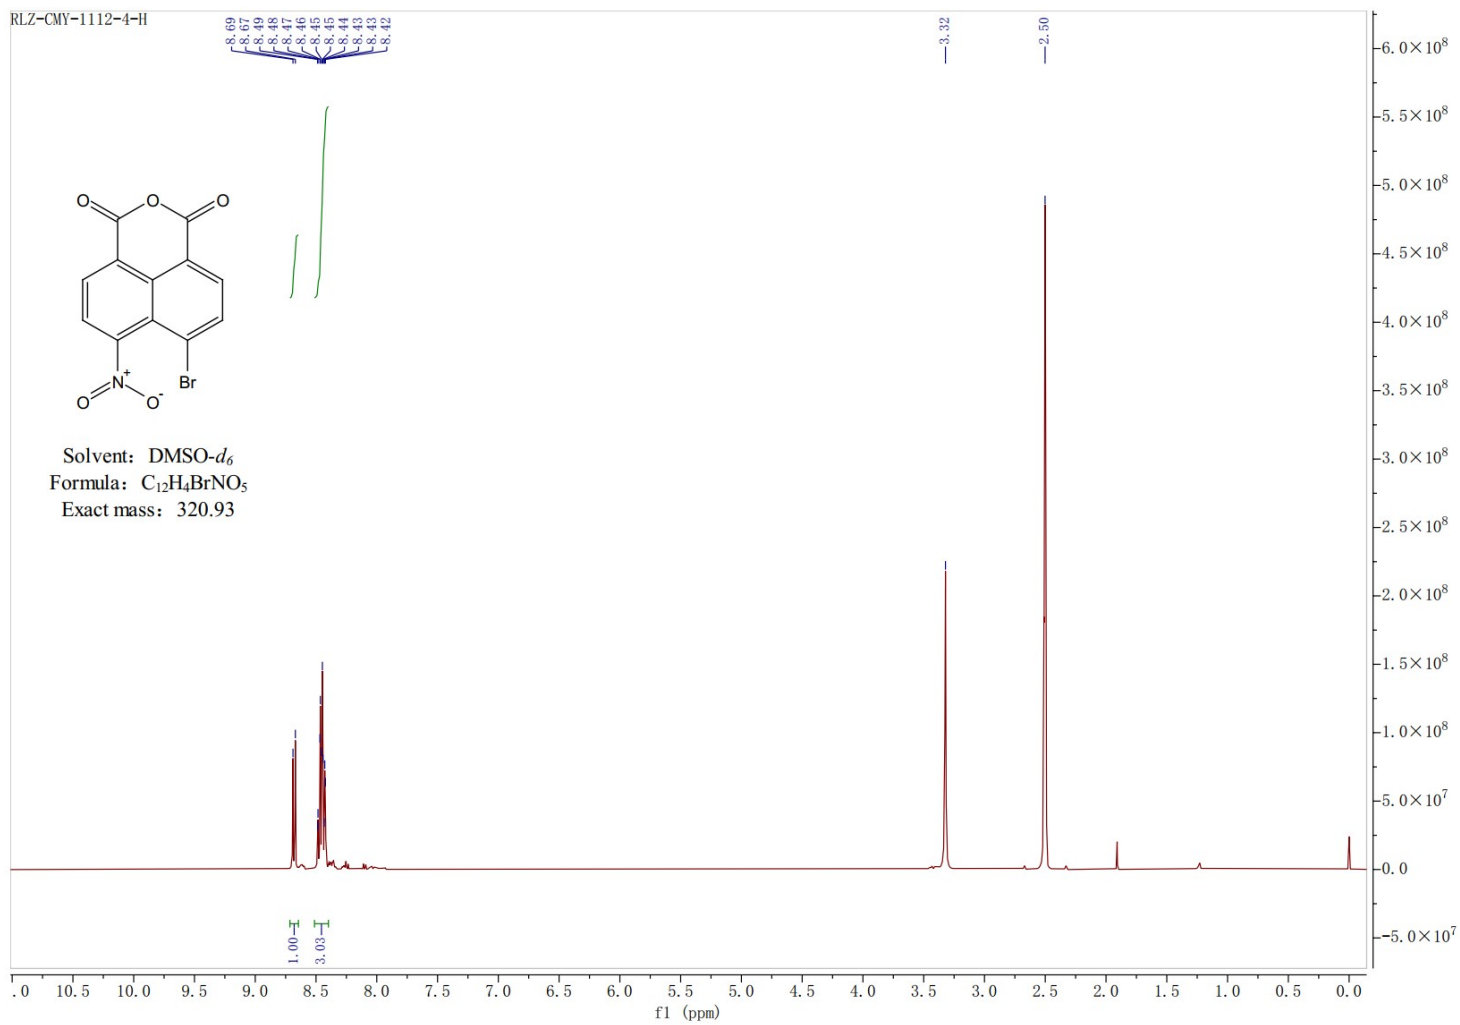

**Fig. S11.** The <sup>1</sup>H NMR spectrum of FP5

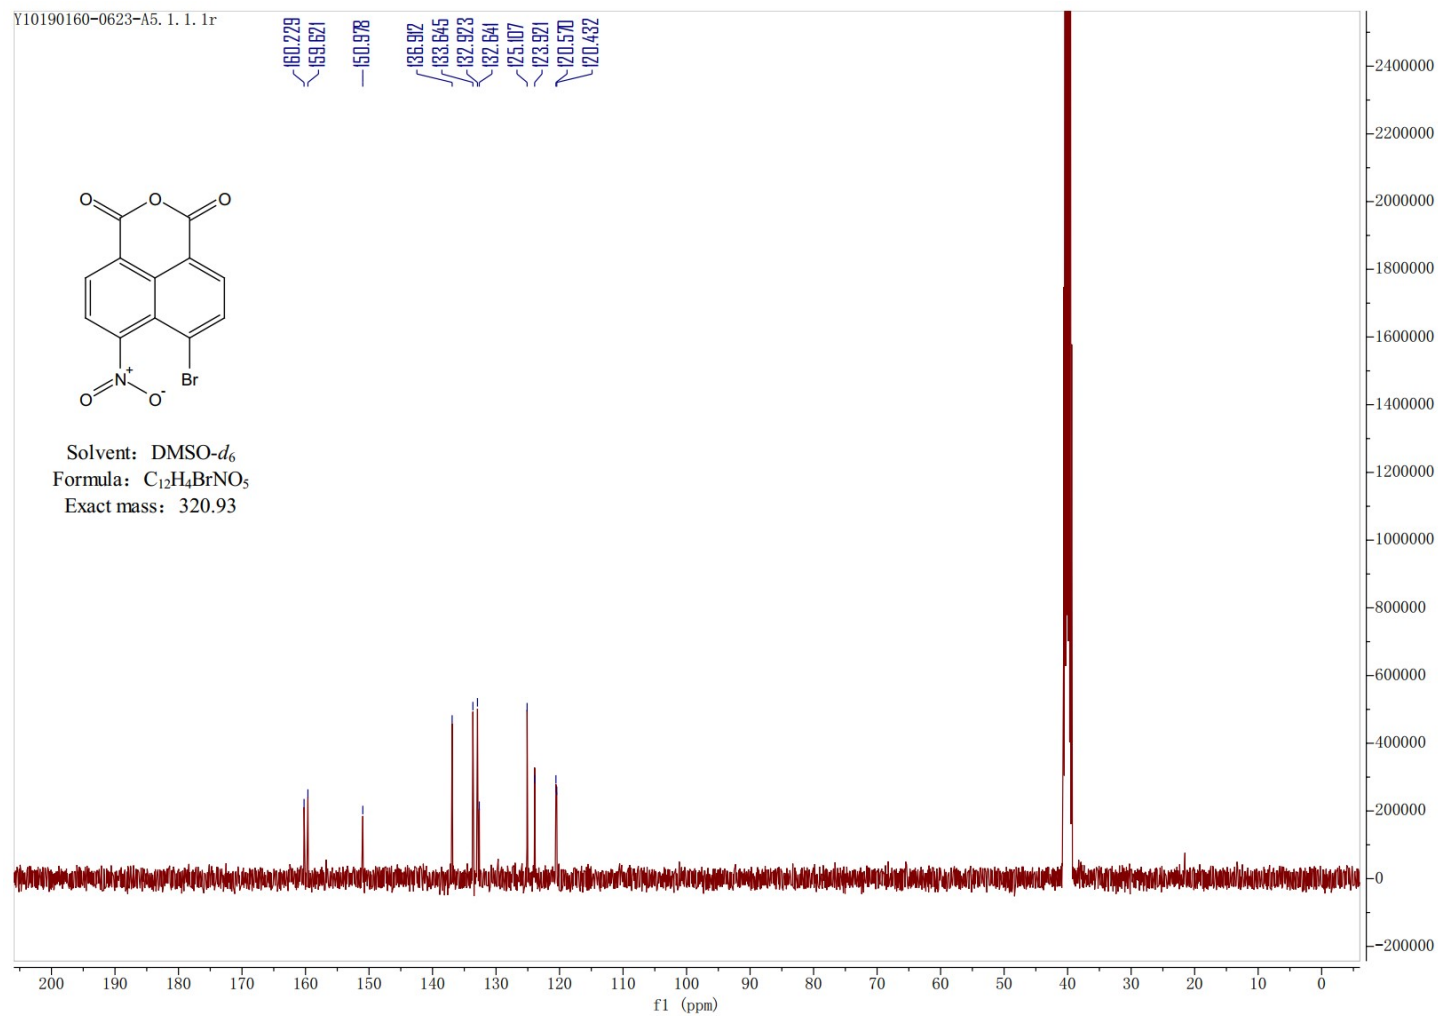

**Fig. S12.** The <sup>13</sup>C NMR spectrum of FP5

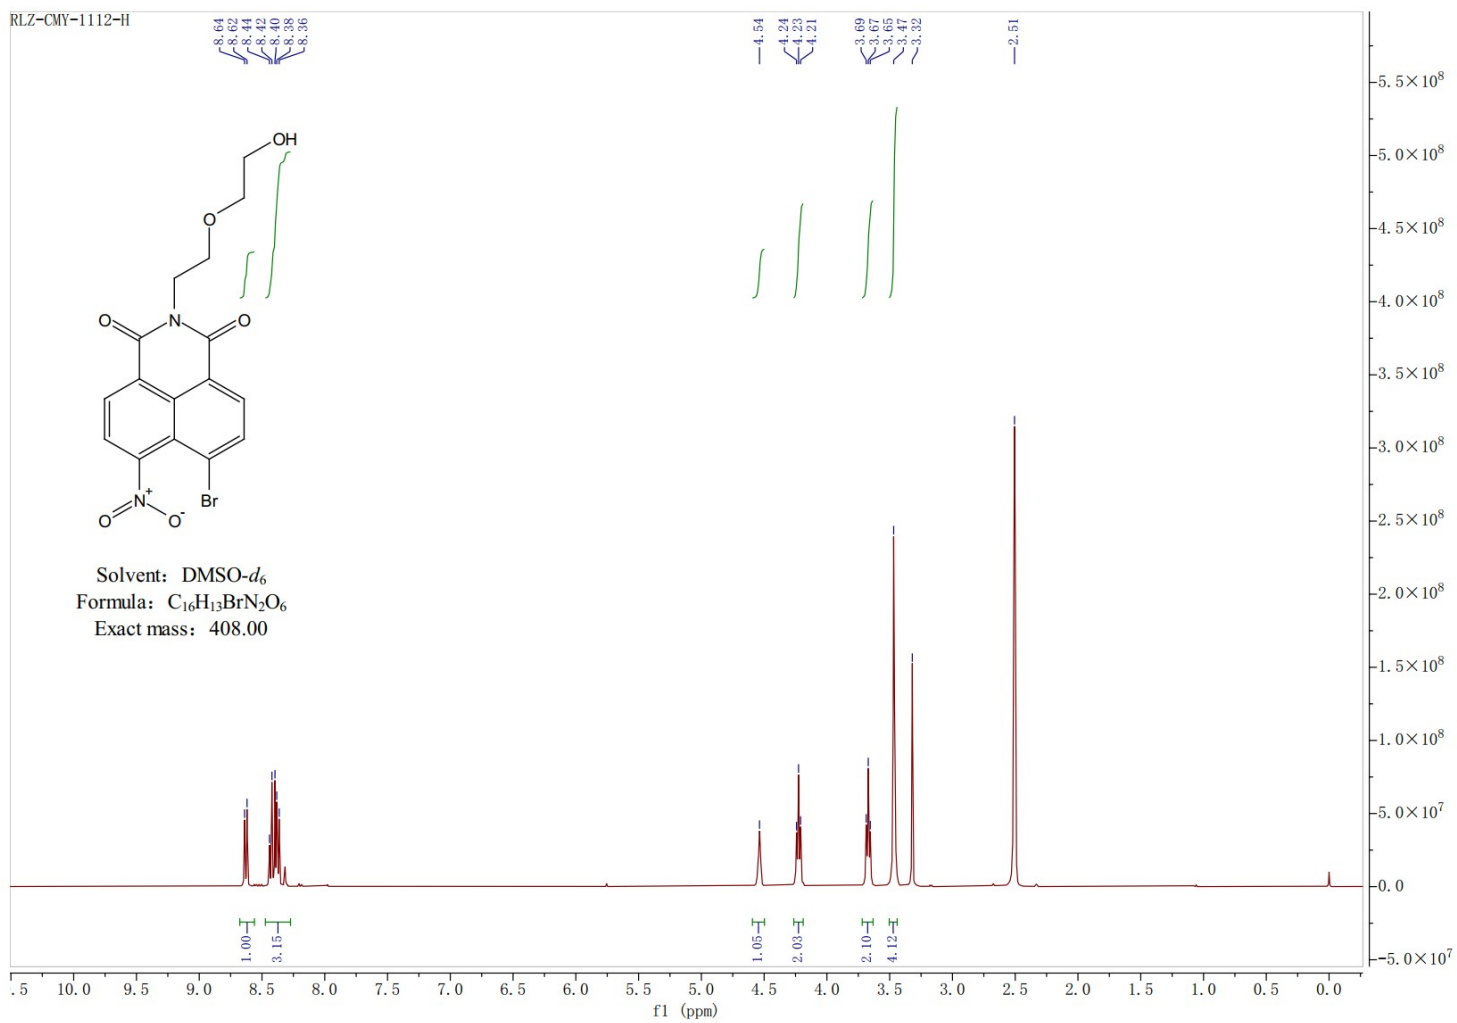

**Fig. S13.** The <sup>1</sup>H NMR spectrum of FP4

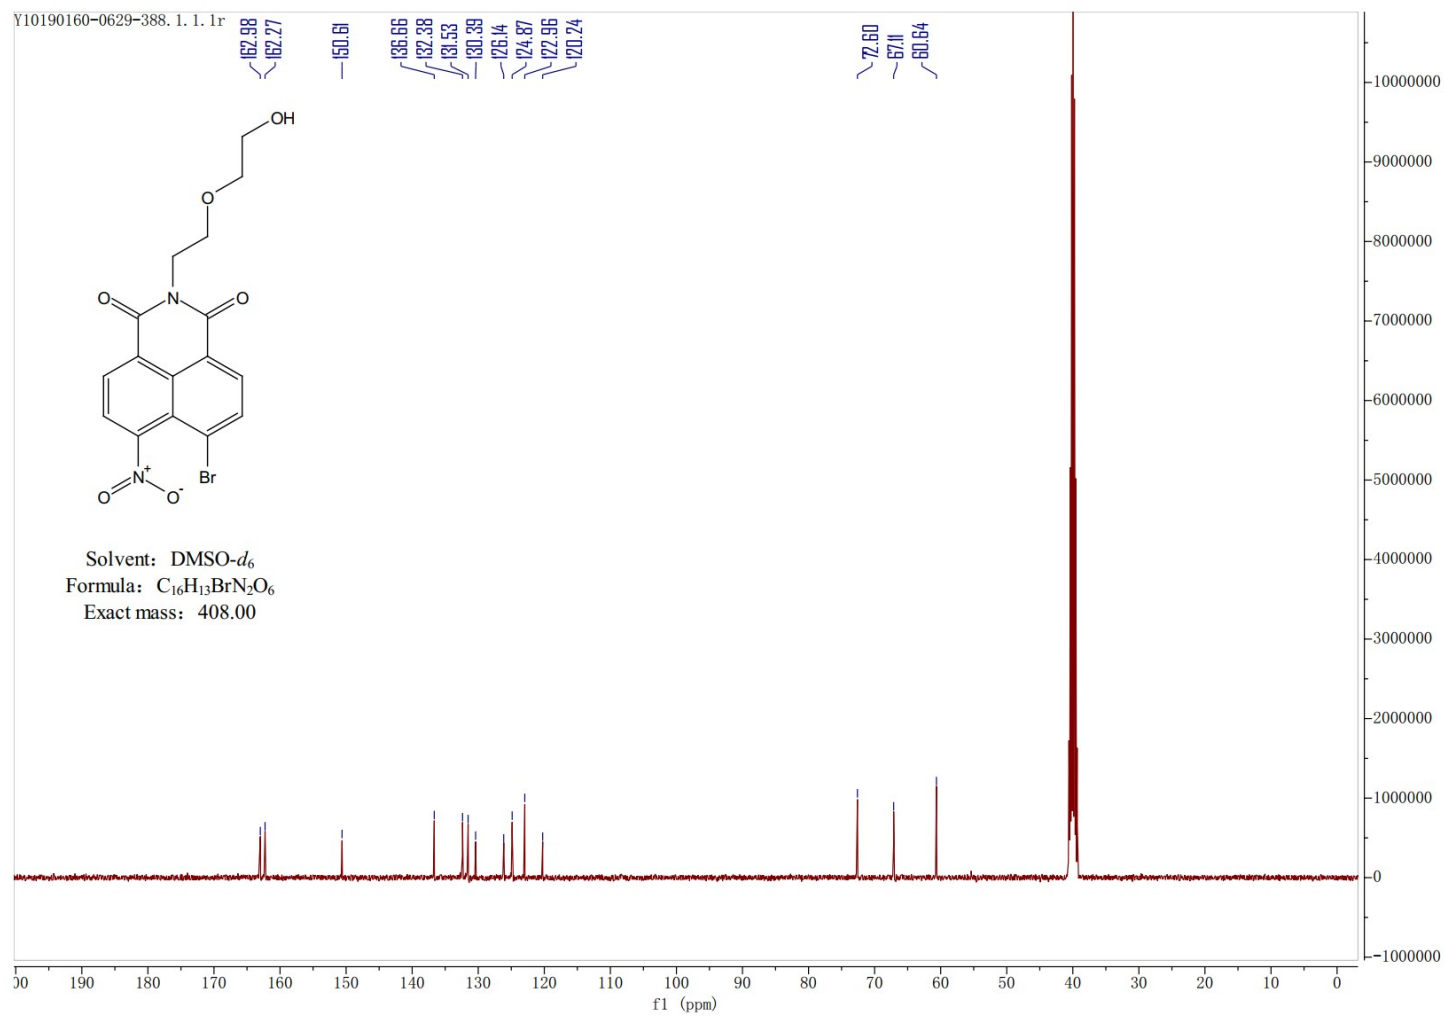

**Fig. S14.** The <sup>13</sup>C NMR spectrum of FP4.

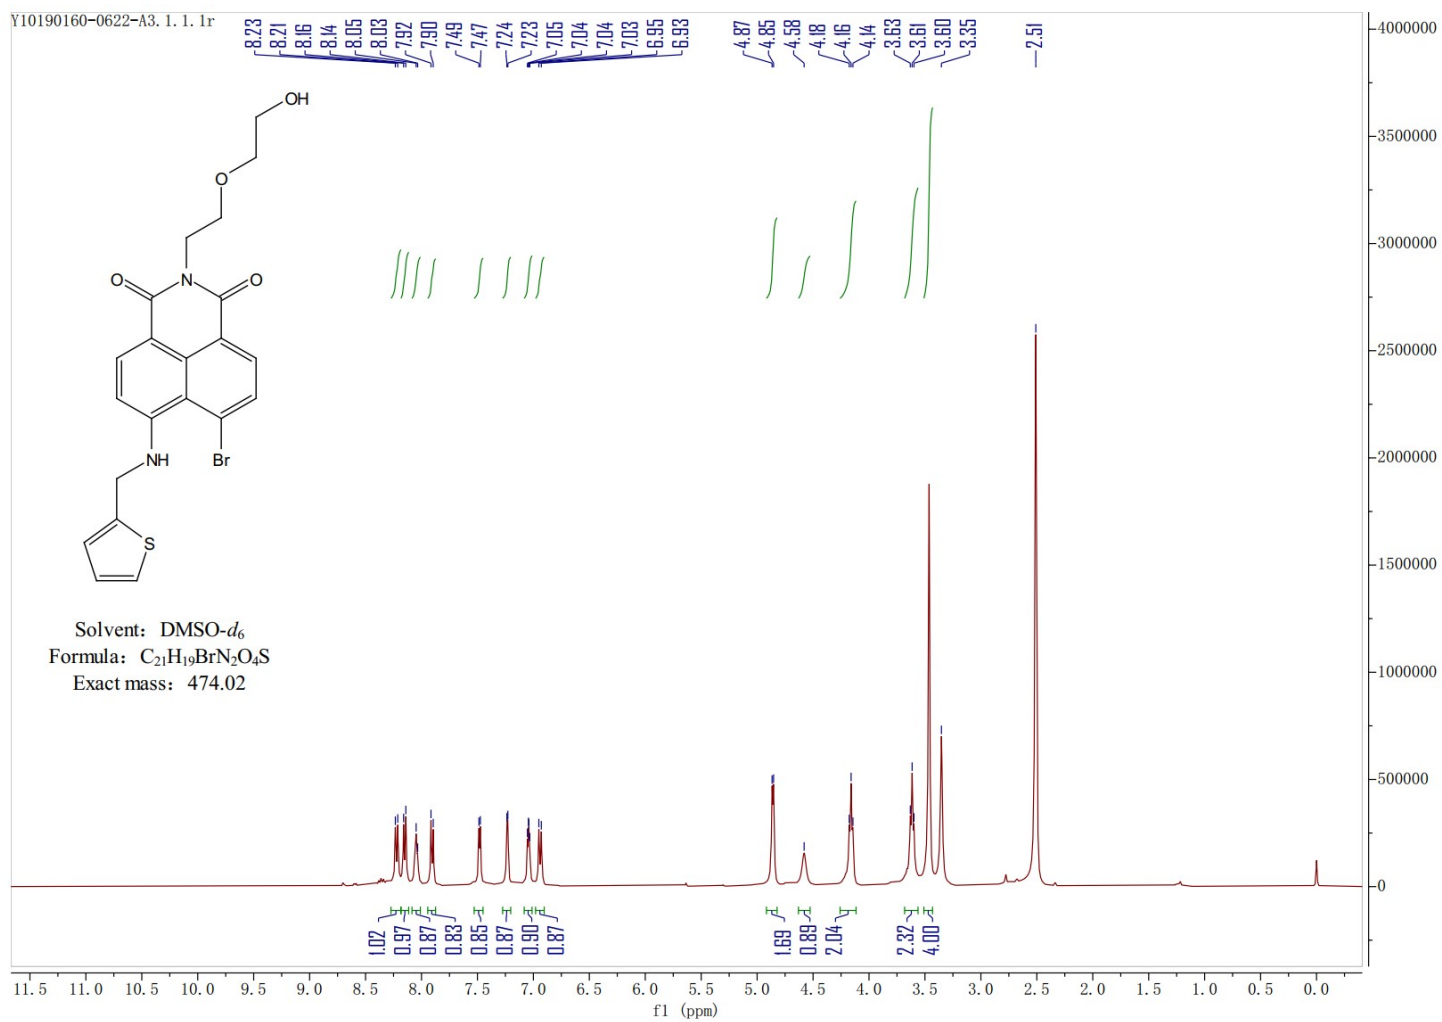

**Fig. S15.** The <sup>1</sup>H NMR spectrum of FP3

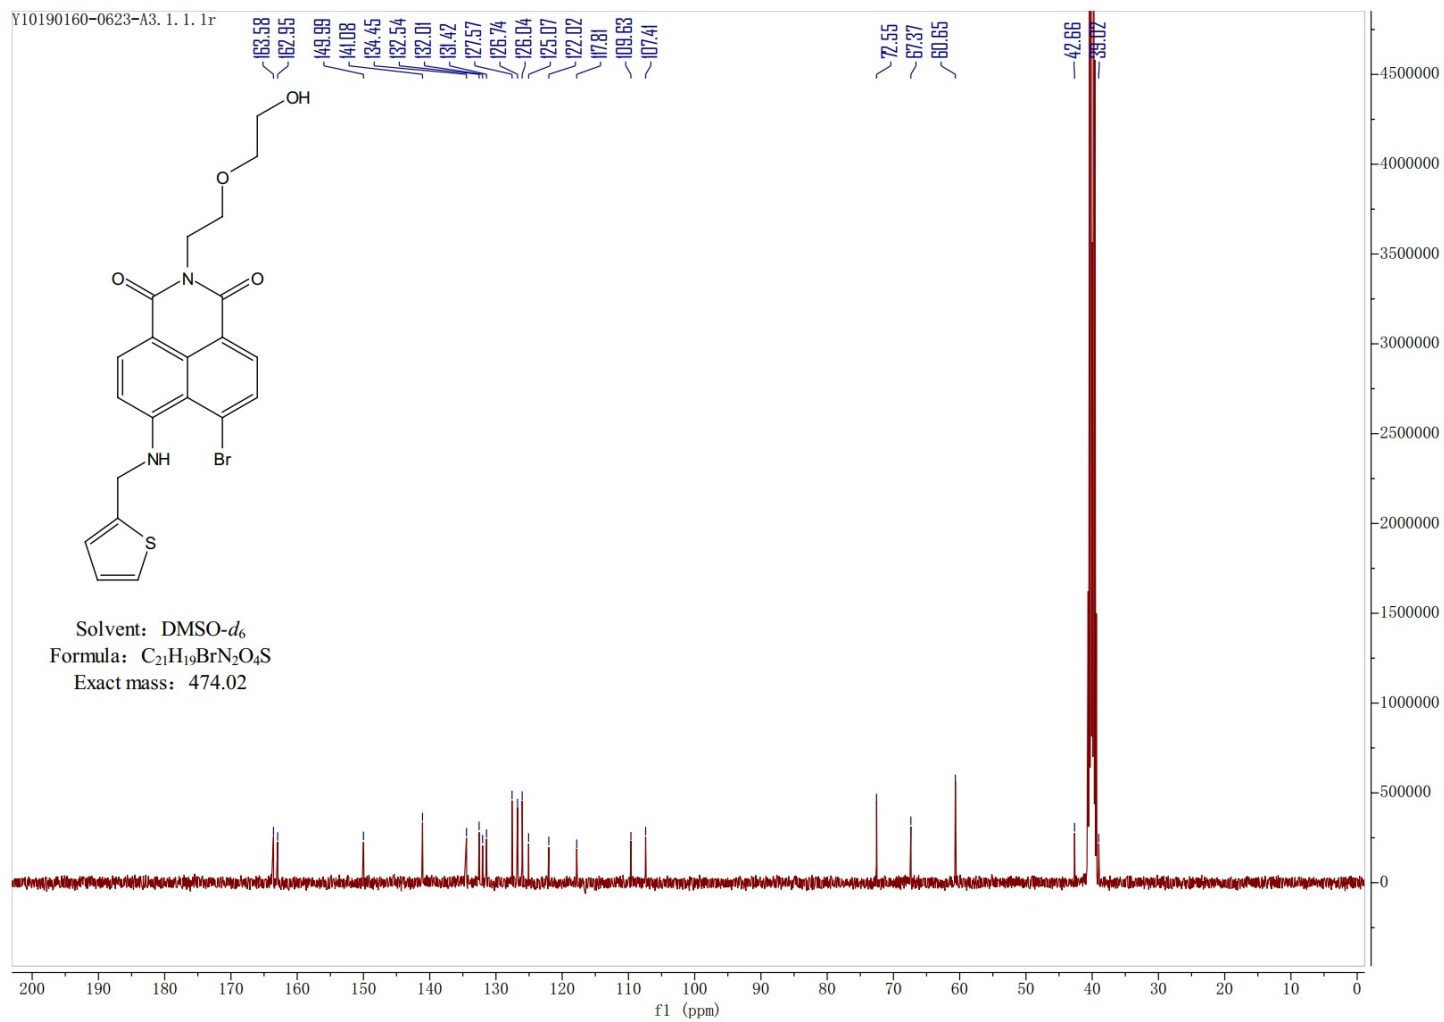

Fig. S16. The <sup>13</sup>C NMR spectrum of FP3.

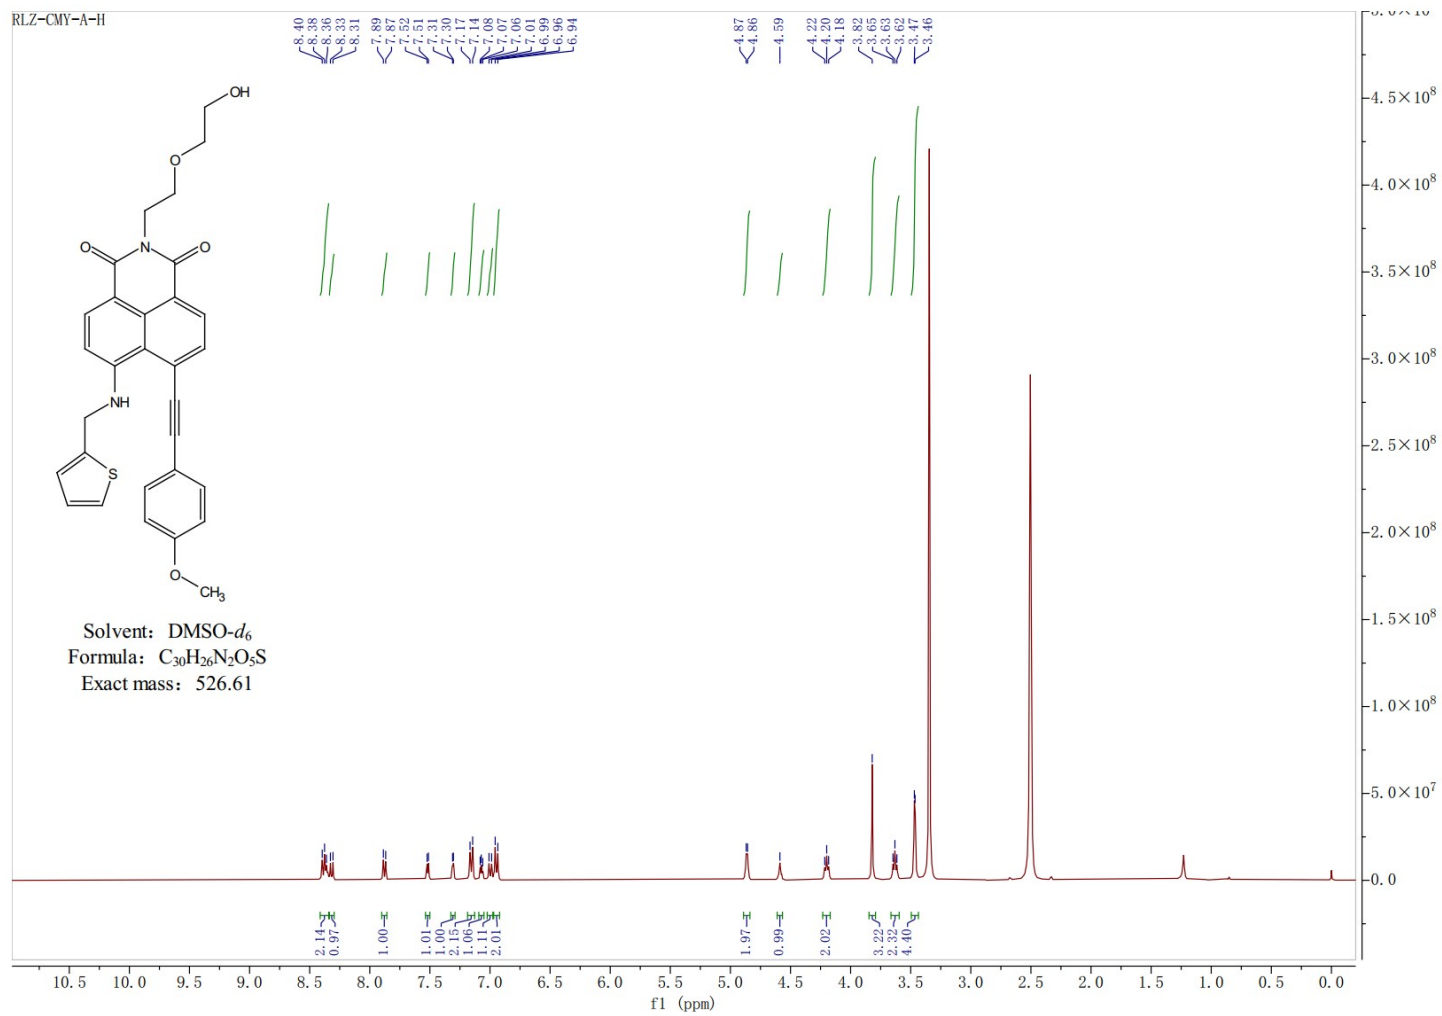

Fig. S17. The  $^1H$  NMR spectrum of FP2



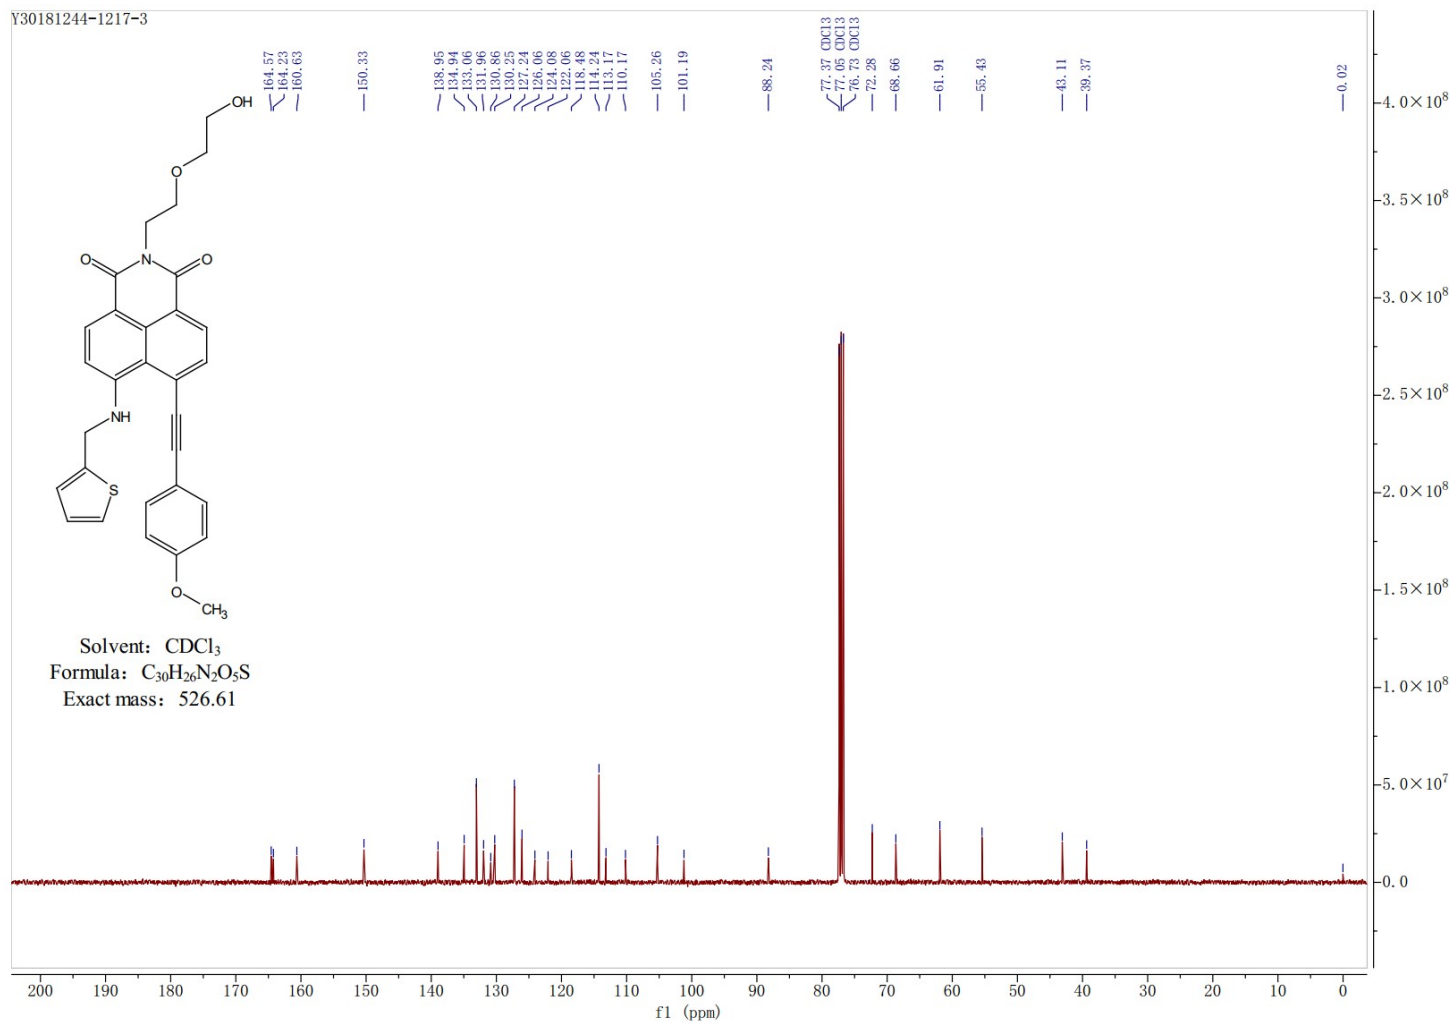

Fig. S18. The <sup>13</sup>C NMR spectrum of FP2.

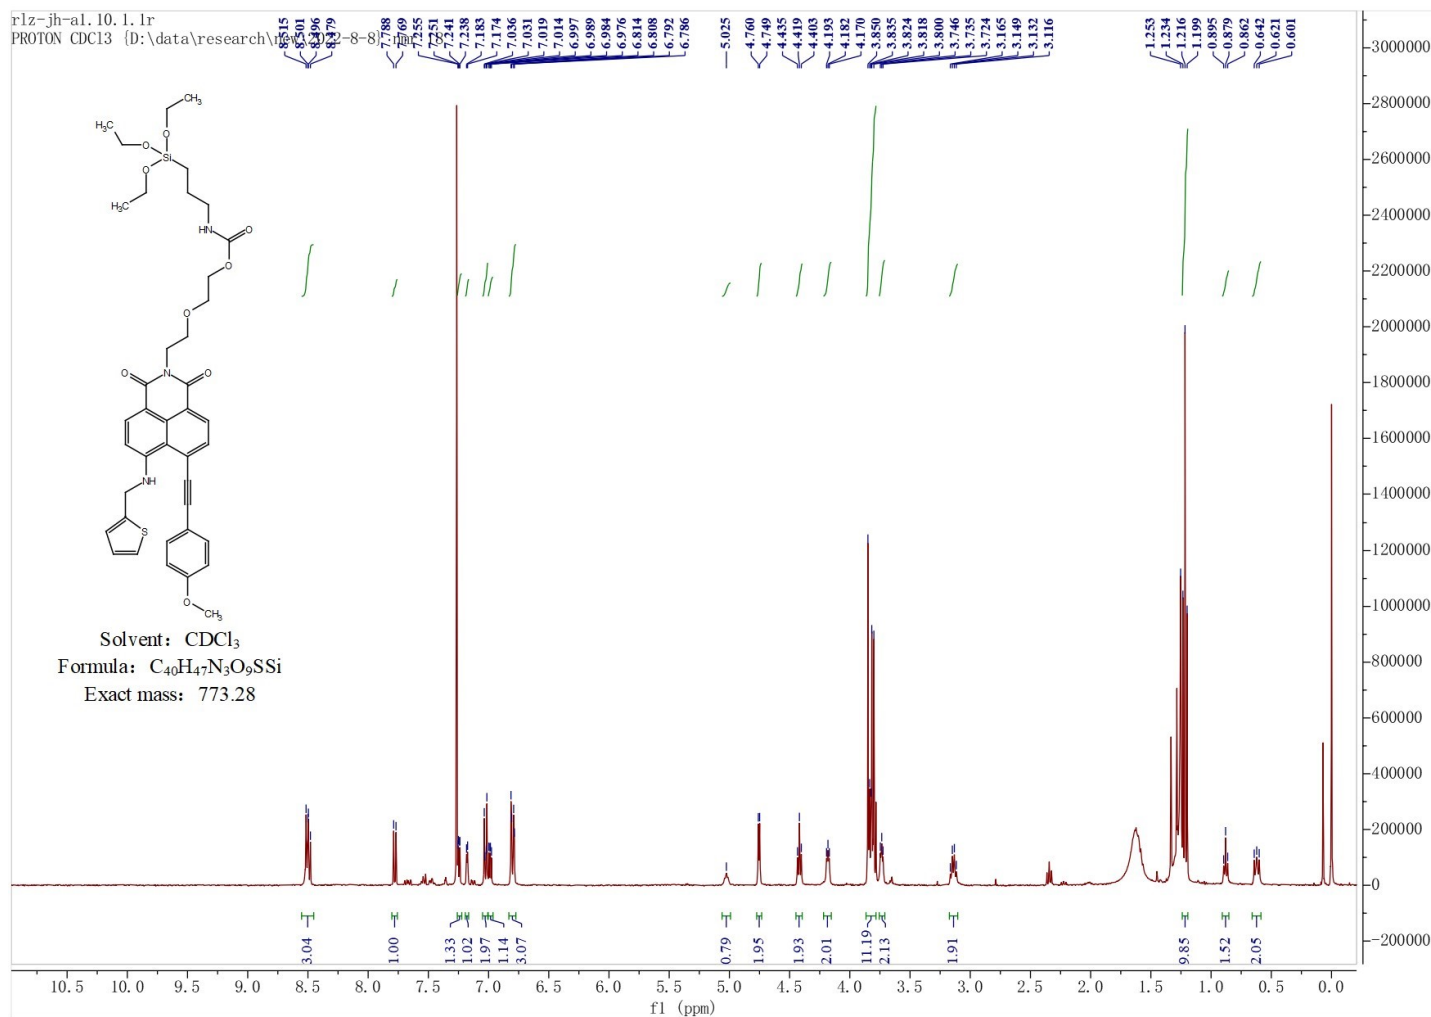

Fig. S19. The <sup>1</sup>H NMR spectrum of FP1

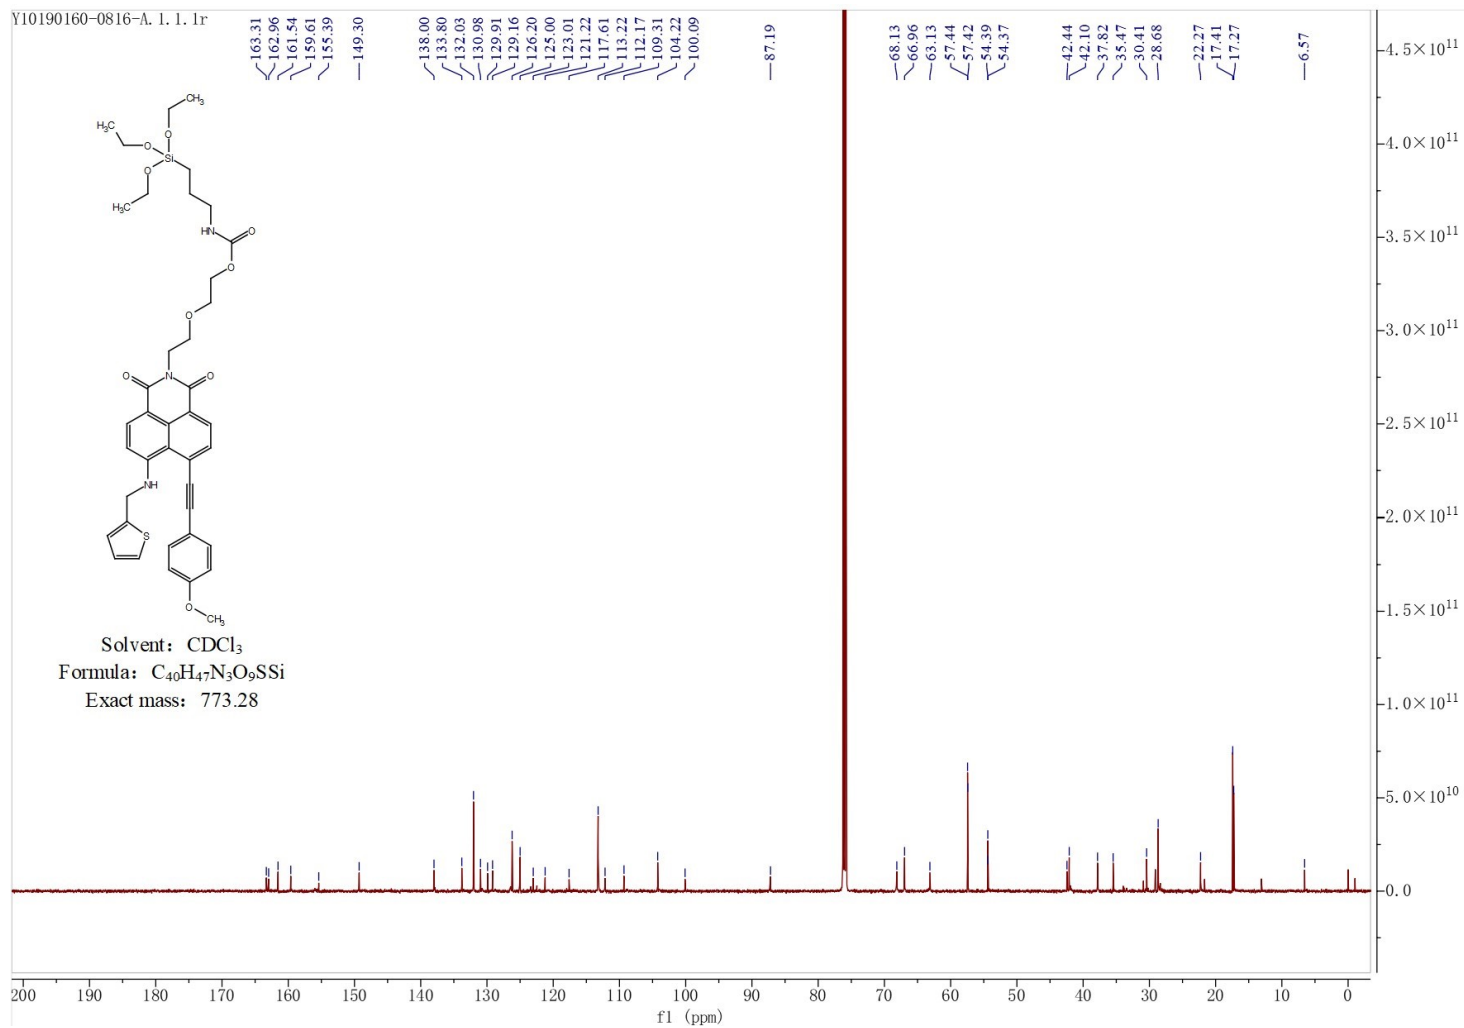

Fig. S20. The <sup>13</sup>C NMR spectrum of FP1

### Single Mass Analysis

Tolerance = 20.0 PPM / DBE: min = -1.5, max = 50.0

Element prediction: Off

Number of isotope peaks used for i-FIT = 3

Monoisotopic Mass, Even Electron Ions

302 formula(e) evaluated with 1 results within limits (up to 50 best isotopic matches for each mass)

Elements Used:

C: 0-40 H: 0-47 N: 0-3 O: 0-9 S: 0-1 Si: 0-1 Na: 0-1

WP-ZHU

ZWP-CMY-A1 312 (3.597) Cm (307:312)

1: TOF MS ES+  
4.20e+003

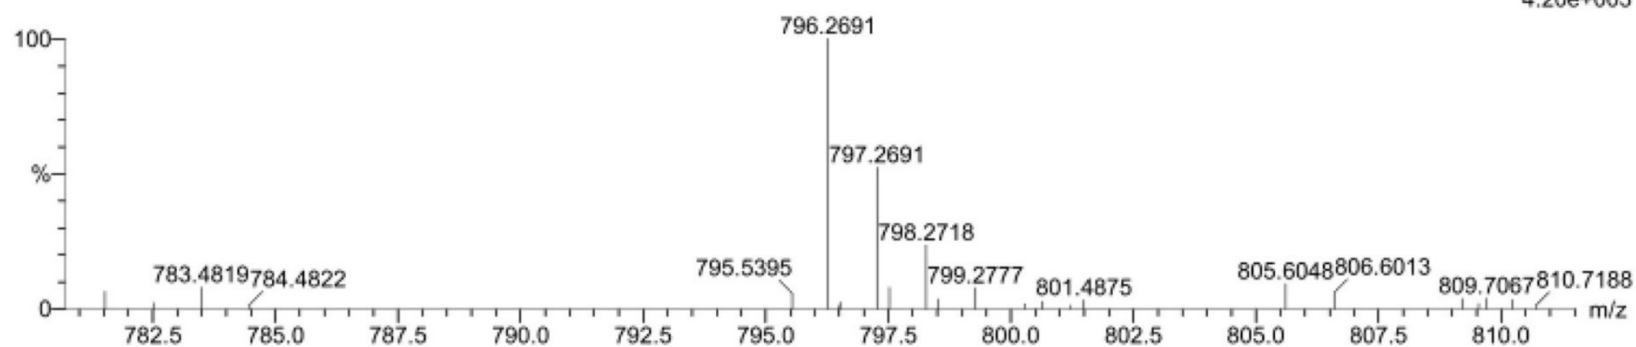

Fig. S21. The HRMS spectrum of FP1

## 12. Spectroscopic data of coupling products

### X1-3: Diphenyl

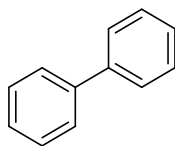

Light yellow solid.  $^1\text{H NMR}$  (400 MHz,  $\text{DMSO-}d_6$ ):  $\delta$  7.72 - 7.62 (m, 4H), 7.47 (t,  $J = 7.6$  Hz, 4H), 7.37 (t,  $J = 7.3$  Hz, 2H).  $^{13}\text{C NMR}$  (100 MHz,  $\text{DMSO-}d_6$ ):  $\delta$  140.68, 129.41, 127.90, 127.17.

### X4-6: 4-Phenyltoluene

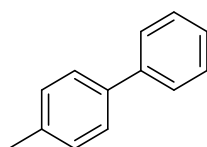

White solid.  $^1\text{H NMR}$  (400 MHz,  $\text{DMSO-}d_6$ ):  $\delta$  7.63 (d,  $J = 7.9$  Hz, 2H), 7.55 (d,  $J = 8.0$  Hz, 2H), 7.44 (t,  $J = 7.6$  Hz, 2H), 7.34 (t,  $J = 7.3$  Hz, 1H), 7.25 (d,  $J = 7.9$  Hz, 2H), 2.33 (s, 3H).  $^{13}\text{C NMR}$  (100 MHz,  $\text{DMSO-}d_6$ ):  $\delta$  140.62, 137.81, 137.14, 129.98, 129.32, 127.55, 126.97, 126.90, 21.12.

### X7-9: 4-Nitrobiphenyl

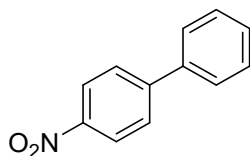

White solid.  $^1\text{H NMR}$  (400 MHz,  $\text{DMSO-}d_6$ ):  $\delta$  8.28 (d,  $J = 8.1$  Hz, 2H), 7.94 (d,  $J = 8.1$  Hz, 2H), 7.77 (d,  $J = 6.9$  Hz, 2H), 7.50 (dd,  $J = 15.4, 6.9$  Hz, 3H).  $^{13}\text{C NMR}$  (100 MHz,  $\text{DMSO-}d_6$ ):  $\delta$  147.30, 147.13, 147.09, 138.29, 133.31, 129.83, 129.70, 129.53, 128.32, 127.74, 125.83, 124.55.

### X10-12, B1: 4-Methoxybiphenyl

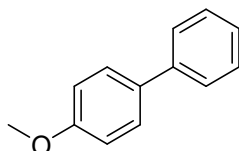

White solid.  $^1\text{H NMR}$  (400 MHz,  $\text{DMSO-}d_6$ ):  $\delta$  7.69 - 7.53 (m, 4H), 7.43 (t,  $J = 7.6$  Hz, 2H), 7.31 (t,  $J = 7.3$  Hz, 1H), 7.03 (d,  $J = 8.7$  Hz, 2H).  $^{13}\text{C NMR}$  (100 MHz,  $\text{DMSO-}d_6$ ):  $\delta$  159.37, 140.32, 133.01, 129.33, 128.22, 127.17, 126.64, 114.83, 55.62.

### X13: 4-Chlorobiphenyl

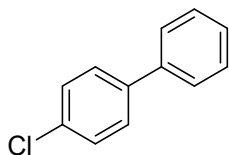

Light yellow solid.  $^1\text{H}$  NMR (400 MHz,  $\text{DMSO-}d_6$ ):  $\delta$  7.75 - 7.61 (m, 4H), 7.56 - 7.43 (m, 4H), 7.39 (t,  $J = 7.3$  Hz, 1H).  $^{13}\text{C}$  NMR (100 MHz,  $\text{DMSO-}d_6$ ):  $\delta$  139.46, 139.30, 132.81, 129.50, 129.40, 129.35, 128.93, 128.28, 127.17, 127.12.

**X14: 4-(Trifluoromethyl)-biphenyl**

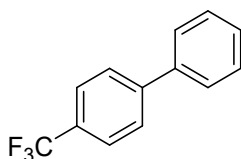

White solid.  $^1\text{H}$  NMR (400 MHz,  $\text{DMSO-}d_6$ ):  $\delta$  7.85 (d,  $J = 8.2$  Hz, 2H), 7.77 (d,  $J = 8.2$  Hz, 2H), 7.70 (d,  $J = 7.4$  Hz, 2H), 7.50 (t,  $J = 7.4$  Hz, 2H), 7.43 (t,  $J = 7.2$  Hz, 1H).  $^{13}\text{C}$  NMR (100 MHz,  $\text{DMSO-}d_6$ ):  $\delta$  197.97, 145.00, 139.38, 136.12, 129.57, 129.38, 128.86, 127.47, 127.35, 27.24.

**X15: 4-Acetylbiphenyl**

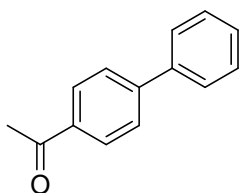

White solid.  $^1\text{H}$  NMR (400 MHz,  $\text{DMSO-}d_6$ ):  $\delta$  8.06 - 8.01 (m, 2H), 7.71 - 7.67 (m, 2H), 7.63 (dt,  $J = 3.1, 1.9$  Hz, 2H), 7.50 - 7.45 (m, 2H), 7.43 - 7.38 (m, 1H), 2.64 (s, 3H).  $^{13}\text{C}$  NMR (100 MHz,  $\text{DMSO-}d_6$ ): 197.96, 145.00, 139.39, 136.12, 129.57, 129.38, 128.85, 127.47, 127.34.

**X16: 2-Cyanobiphenyl**

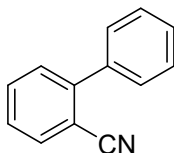

Yellow solid.  $^1\text{H}$  NMR (400 MHz,  $\text{DMSO-}d_6$ ):  $\delta$  7.96 (d,  $J = 7.8$  Hz, 1H), 7.80 (td,  $J = 7.8, 1.1$  Hz, 1H), 7.69 - 7.46 (m, 7H).  $^{13}\text{C}$  NMR (100 MHz,  $\text{DMSO-}d_6$ ):  $\delta$  145.02, 138.32, 134.31, 134.00, 130.60, 129.19, 128.67, 119.03, 110.67.

**X17: Methyl biphenyl-2-carboxylate**

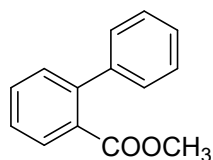

White solid.  $^1\text{H}$  NMR (400 MHz,  $\text{DMSO-}d_6$ ):  $\delta$  7.74 (dd,  $J = 7.7, 1.0$  Hz, 1H), 7.63 (td,  $J = 7.6, 1.3$  Hz, 1H), 7.50 (td,  $J = 7.6, 1.1$  Hz, 1H), 7.43 (t,  $J = 7.9$  Hz, 3H), 7.40 - 7.35 (m, 1H), 7.32 - 7.27 (m, 2H), 3.58 (s, 3H).  $^{13}\text{C}$  NMR (100 MHz,  $\text{DMSO-}d_6$ ):  $\delta$  167.44, 141.03, 136.24, 133.37, 130.72, 128.69, 94.68, 52.96.

**B2-3: 4-Methoxy-4'-Methylbiphenyl**

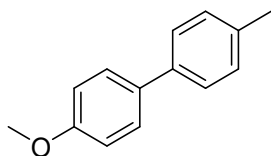

White solid.  $^1\text{H}$  NMR (400 MHz,  $\text{DMSO-}d_6$ ):  $\delta$  7.68 - 7.38 (m, 4H), 7.23 (m, 2H), 7.00 (m, 2H), 3.78 (s, 3H), 2.32 (s, 3H).  $^{13}\text{C}$  NMR (100 MHz,  $\text{DMSO-}d_6$ ):  $\delta$  159.13, 137.45, 136.34, 134.95, 132.96, 129.92, 129.00, 127.94, 126.47, 114.78, 83.93, 55.62, 25.15, 21.09.

**B4: 4-Methoxy-3'-Methylbiphenyl**

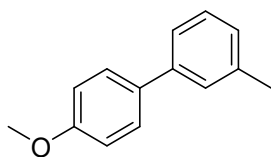

White solid.  $^1\text{H}$  NMR (400 MHz,  $\text{DMSO-}d_6$ ):  $\delta$  7.62 - 7.55 (m, 2H), 7.44 - 7.37 (m, 2H), 7.31 (t,  $J = 7.6$  Hz, 1H), 7.12 (d,  $J = 7.4$  Hz, 1H), 7.05 - 6.98 (m, 2H), 3.79 (s, 3H), 2.36 (s, 3H).  $^{13}\text{C}$  NMR (100 MHz,  $\text{DMSO-}d_6$ ):  $\delta$  159.29, 140.27, 138.41, 133.11, 129.22, 128.20, 127.82, 127.32, 123.77, 114.77, 55.62, 21.61.

**B5: 4-Methoxy-[1,1'-biphenyl]-4'-carbonitrile**

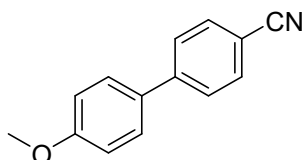

White solid.  $^1\text{H}$  NMR (400 MHz,  $\text{DMSO-}d_6$ ):  $\delta$  7.86 (q,  $J = 8.5$  Hz, 4H), 7.72 (t,  $J = 5.8$  Hz, 2H), 7.12 - 7.03 (m, 2H), 3.82 (s, 3H).  $^{13}\text{C}$  NMR (100 MHz,  $\text{DMSO-}d_6$ ):  $\delta$  160.39, 144.73, 133.26, 130.88, 128.80, 127.33, 119.49, 115.09, 109.60, 55.76.

**B6: 4-Fluoro-4'-methoxybiphenyl**

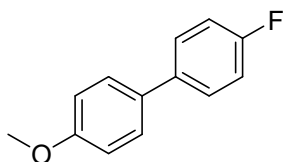

White solid.  $^1\text{H NMR}$  (400 MHz,  $\text{DMSO-}d_6$ ):  $\delta$  7.68 - 7.61 (m, 2H), 7.61 - 7.55 (m, 2H), 7.30 - 7.21 (m, 2H), 7.05 - 6.99 (m, 2H), 3.80 (s, 3H).  $^{13}\text{C NMR}$  (100 MHz,  $\text{DMSO-}d_6$ ):  $\delta$  163.12, 160.70, 159.33, 136.83, 136.80, 132.01, 128.57, 128.49, 128.20, 116.15, 115.94, 114.84, 55.63.

**B7: 4-Methoxy-4'-nitrobiphenyl**

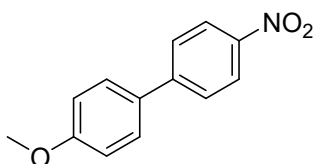

White solid.  $^1\text{H NMR}$  (400 MHz,  $\text{DMSO-}d_6$ ):  $\delta$  8.33 - 8.22 (m, 2H), 7.98 - 7.88 (m, 2H), 7.82 - 7.71 (m, 2H), 7.09 (d,  $J = 8.8$  Hz, 2H), 3.83 (s, 3H).  $^{13}\text{C NMR}$  (100 MHz,  $\text{DMSO-}d_6$ ):  $\delta$  160.67, 146.76, 146.48, 130.41, 129.05, 127.48, 124.57, 115.17, 55.79.

**B8: 1-methoxy-2-(4-methoxyphenyl)benzene**

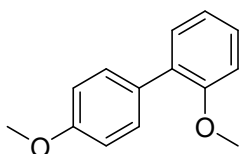

White solid.  $^1\text{H NMR}$  (400 MHz,  $\text{DMSO-}d_6$ ):  $\delta$  7.41 (d,  $J = 8.4$  Hz, 2H), 7.35 - 7.22 (m, 2H), 7.10 (t,  $J = 10.9$  Hz, 1H), 6.99 (dd,  $J = 17.9, 7.8$  Hz, 3H), 3.77 (d,  $J = 12.8$  Hz, 6H).  $^{13}\text{C NMR}$  (100 MHz,  $\text{DMSO-}d_6$ ):  $\delta$  158.71, 156.55, 130.86, 130.80, 130.62, 129.96, 128.78, 121.21, 113.92, 112.16, 55.89, 55.54.

**B9: 1-methoxy-4-[4-(trifluoromethyl)phenyl]benzene**

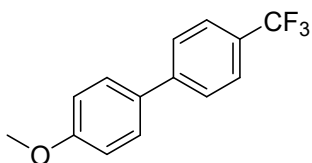

White solid.  $^1\text{H NMR}$  (400 MHz,  $\text{DMSO-}d_6$ ):  $\delta$  7.84 (d,  $J = 8.2$  Hz, 2H), 7.76 (d,  $J = 8.3$  Hz, 2H), 7.69 (d,  $J = 8.8$  Hz, 2H), 7.07 (d,  $J = 8.8$  Hz, 2H), 3.81 (s, 3H).  $^{13}\text{C NMR}$  (100 MHz,  $\text{DMSO-}d_6$ ):  $\delta$  160.15, 131.26, 128.68, 127.25, 126.17, 126.13, 115.02, 55.70.

**A1: 2-(4-methylphenyl)quinoxaline**



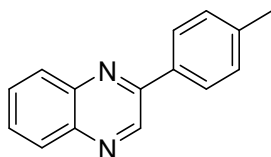

Yellow solid.  $^1\text{H}$  NMR (400 MHz,  $\text{DMSO-}d_6$ ):  $\delta$  9.57 (s, 1H), 8.26 (d,  $J = 8.2$  Hz, 2H), 8.17 - 8.07 (m, 2H), 7.86 (dtd,  $J = 14.8, 6.9, 1.4$  Hz, 2H), 7.42 (d,  $J = 8.0$  Hz, 2H), 2.42 (s, 3H).  $^{13}\text{C}$  NMR (100 MHz,  $\text{DMSO-}d_6$ ):  $\delta$  151.41, 144.10, 141.91, 141.44, 140.81, 133.75, 131.04, 130.22, 130.14, 129.59, 129.31, 127.83, 21.45.

**A2: 1-methyl-5-[5-(trifluoromethyl)-2-pyridinyl]-indole**

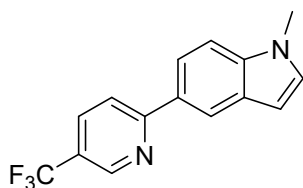

White solid.  $^1\text{H}$  NMR (400 MHz,  $\text{DMSO-}d_6$ ):  $\delta$  8.99 (s, 1H), 8.43 (s, 1H), 8.19 (d,  $J = 1.4$  Hz, 2H), 8.02 (dd,  $J = 8.7, 1.5$  Hz, 1H), 7.57 (d,  $J = 8.7$  Hz, 1H), 7.42 (d,  $J = 3.1$  Hz, 1H), 6.57 (d,  $J = 2.9$  Hz, 1H), 3.84 (s, 3H).  $^{13}\text{C}$  NMR (100 MHz,  $\text{DMSO-}d_6$ ):  $\delta$  161.72, 146.50, 146.46, 138.04, 134.76, 134.72, 131.46, 128.85, 128.81, 125.99, 123.29, 122.98, 122.66, 120.88, 120.36, 120.01, 110.62, 102.08, 33.10.

**A3: 5-[4-(trifluoromethoxy)phenyl]-2-thiophenecarboxaldehyde**

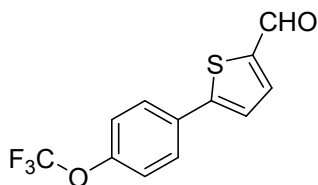

White solid.  $^1\text{H}$  NMR (400 MHz,  $\text{DMSO-}d_6$ ):  $\delta$  9.94 (s, 1H), 8.07 (d,  $J = 3.9$  Hz, 1H), 7.94 (d,  $J = 8.7$  Hz, 2H), 7.79 (d,  $J = 3.9$  Hz, 1H), 7.49 (d,  $J = 8.4$  Hz, 2H).  $^{13}\text{C}$  NMR (100 MHz,  $\text{DMSO-}d_6$ ):  $\delta$  184.65, 151.09, 149.34, 143.10, 139.62, 132.22, 128.72, 126.63, 122.31.

**A4: 1-(2,4-dimethoxyphenyl)-2-naphthalenol**

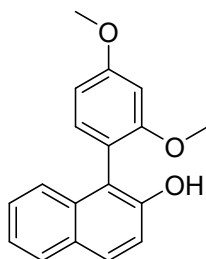

White solid.  $^1\text{H}$  NMR (400 MHz,  $\text{DMSO-}d_6$ ):  $\delta$  9.18 (s, 1H), 7.80 - 7.75 (m, 1H), 7.73 (d,  $J = 8.8$  Hz, 1H), 7.29 - 7.19 (m, 3H), 7.16 (dd,  $J = 7.9, 1.0$  Hz, 1H), 7.01 (d,  $J = 8.2$  Hz, 1H), 6.70 (d,  $J = 2.3$  Hz, 1H), 6.63 (dd,  $J = 8.3, 2.4$  Hz, 1H), 3.84 (s, 3H), 3.60 (s, 3H).  $^{13}\text{C}$  NMR (100 MHz,  $\text{DMSO-}d_6$ ):  $\delta$  160.51, 158.87, 152.78, 134.57, 133.04, 128.66, 128.27, 128.19, 126.23, 124.79, 122.64, 118.83, 118.36, 117.64, 105.37, 99.15, 55.67.

**M1: 2,6-diphenylpyridine**

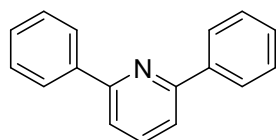

White solid.  $^1\text{H}$  NMR (400 MHz,  $\text{DMSO-}d_6$ ):  $\delta$  8.28 - 8.18 (m, 4H), 8.02 - 7.91 (m, 3H), 7.55 (t,  $J = 7.4$  Hz, 4H), 7.51 - 7.43 (m, 2H).  $^{13}\text{C}$  NMR (100 MHz,  $\text{DMSO-}d_6$ ):  $\delta$  156.11, 139.16, 138.82, 129.64, 129.27, 127.10, 119.32.

**M2: 4,4''-bis(trifluoromethoxy)-1,1':4',1''-terphenyl**

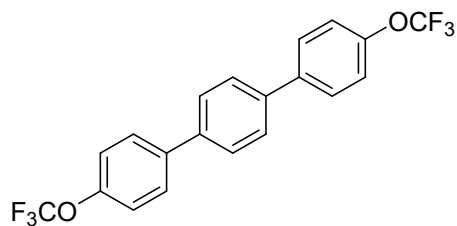

White solid.  $^1\text{H}$  NMR (400 MHz,  $\text{DMSO-}d_6$ ):  $\delta$  7.86 (d,  $J = 7.9$  Hz, 4H), 7.81 (s, 4H), 7.48 (d,  $J = 7.6$  Hz, 4H).  $^{13}\text{C}$  NMR (100 MHz,  $\text{DMSO-}d_6$ ):  $\delta$  148.43, 139.26, 138.59, 129.02, 127.92, 122.00.

### 13. <sup>1</sup>H NMR and <sup>13</sup>C NMR spectra of coupling products

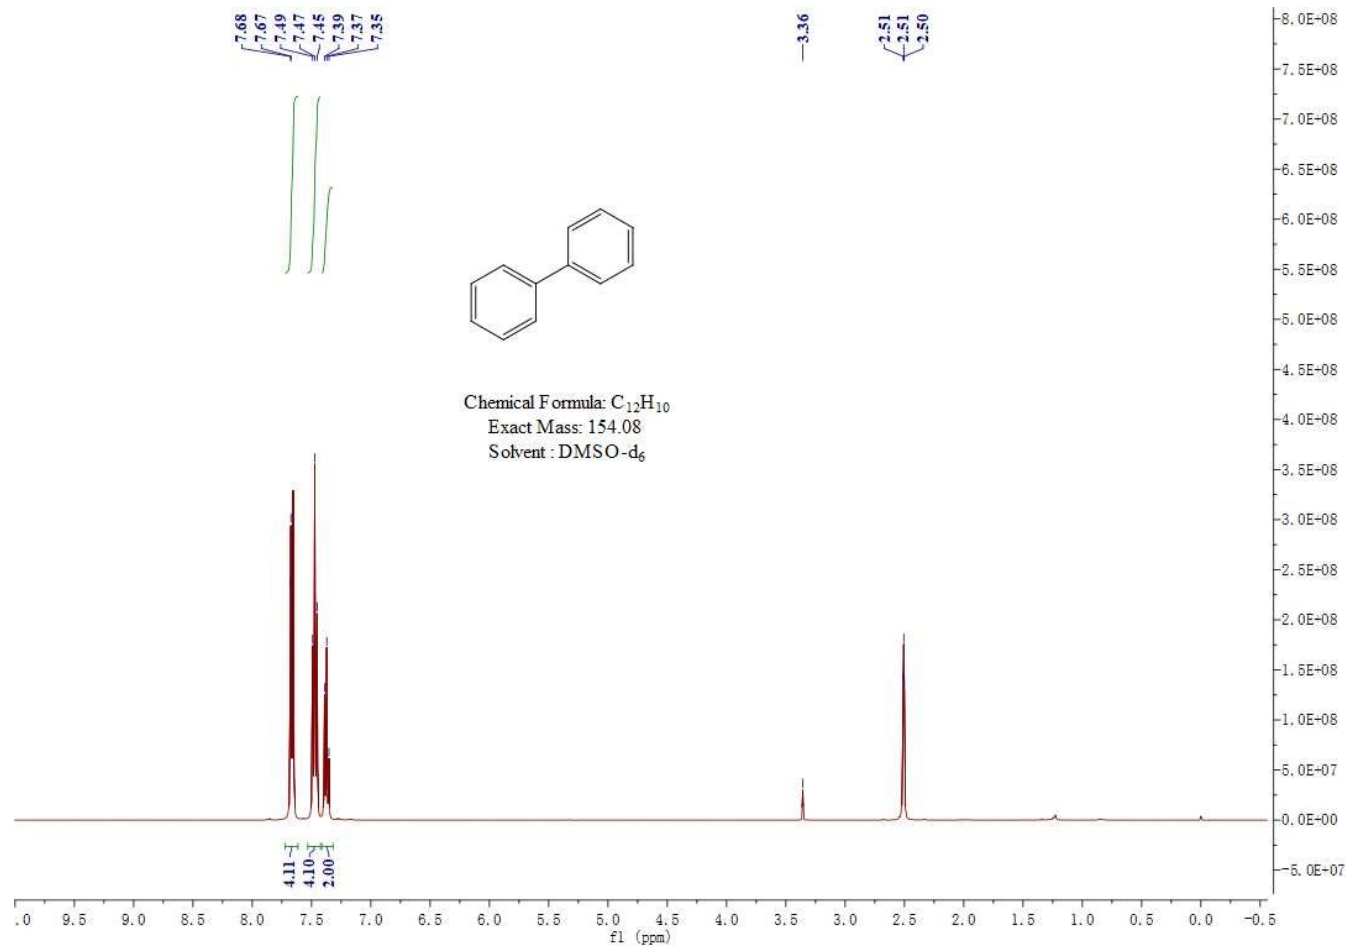

Fig. S22. The <sup>1</sup>H NMR spectrum of X1-3

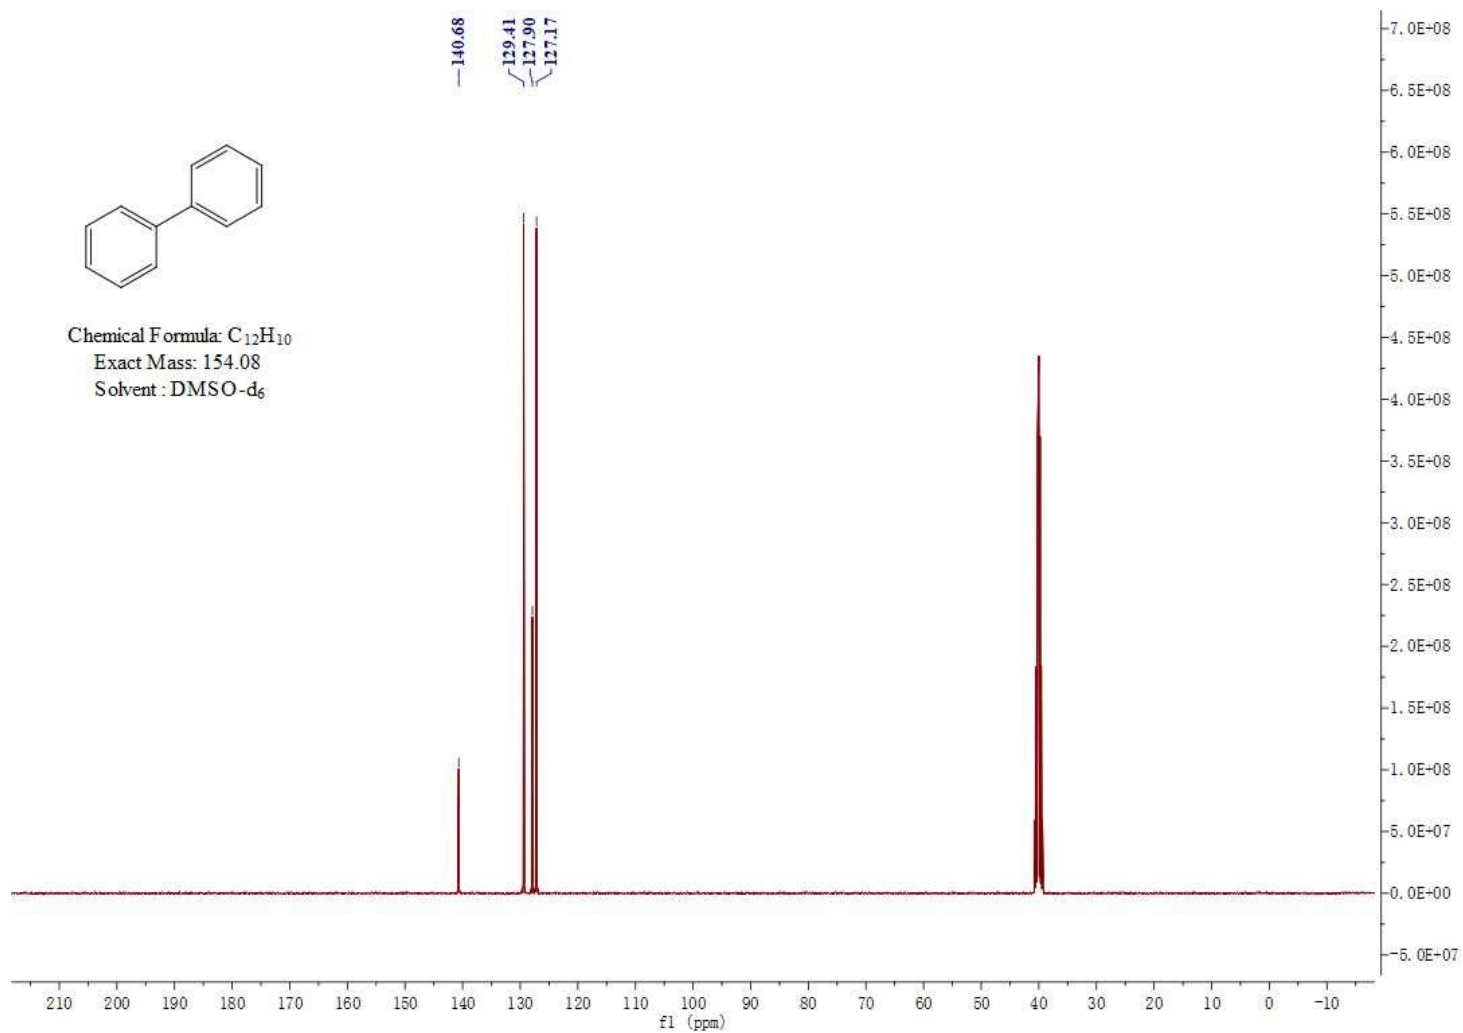

Fig. S23. The <sup>13</sup>C NMR spectrum of X1-3

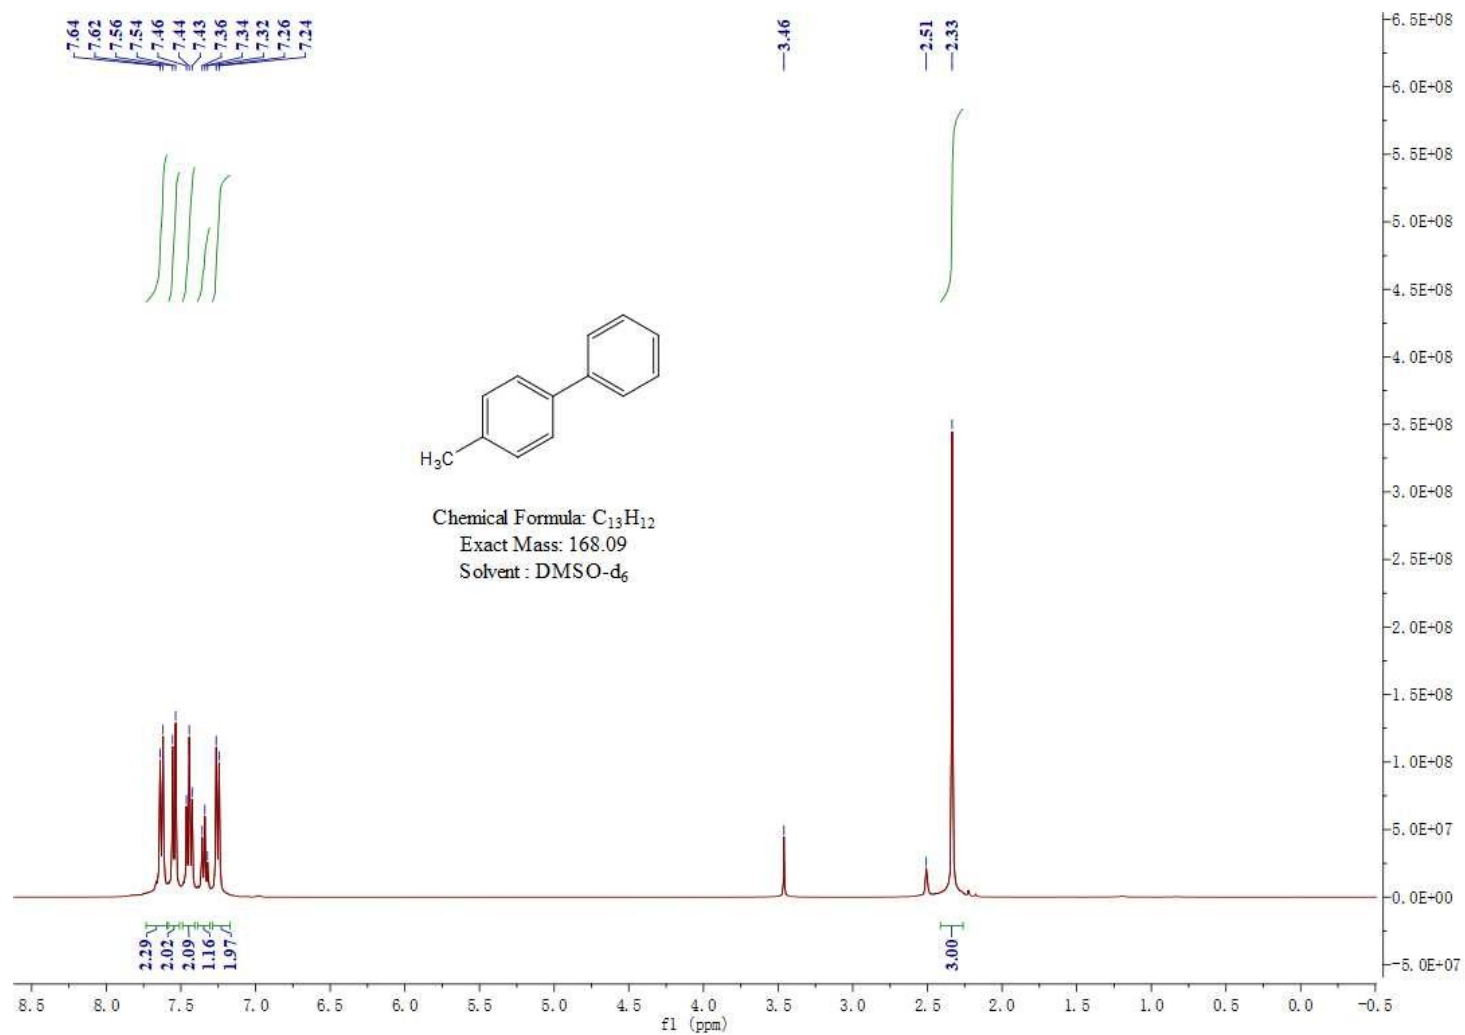

Fig. S24. The  $^1H$  NMR spectrum of X4-6

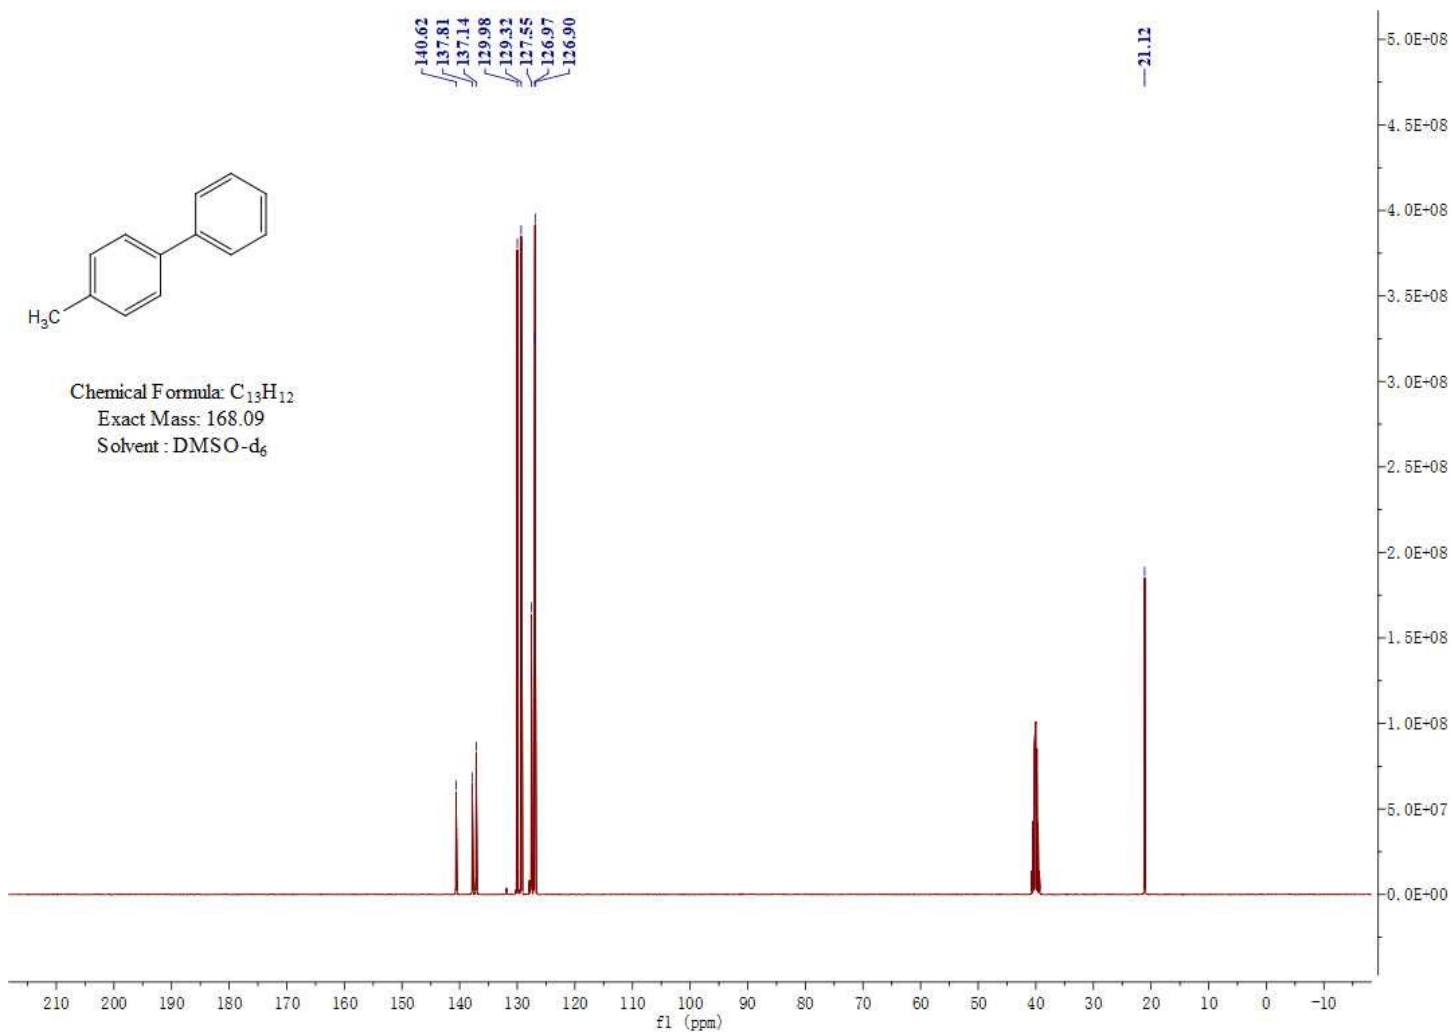

Fig. S25. The <sup>13</sup>C NMR spectrum of X4-6

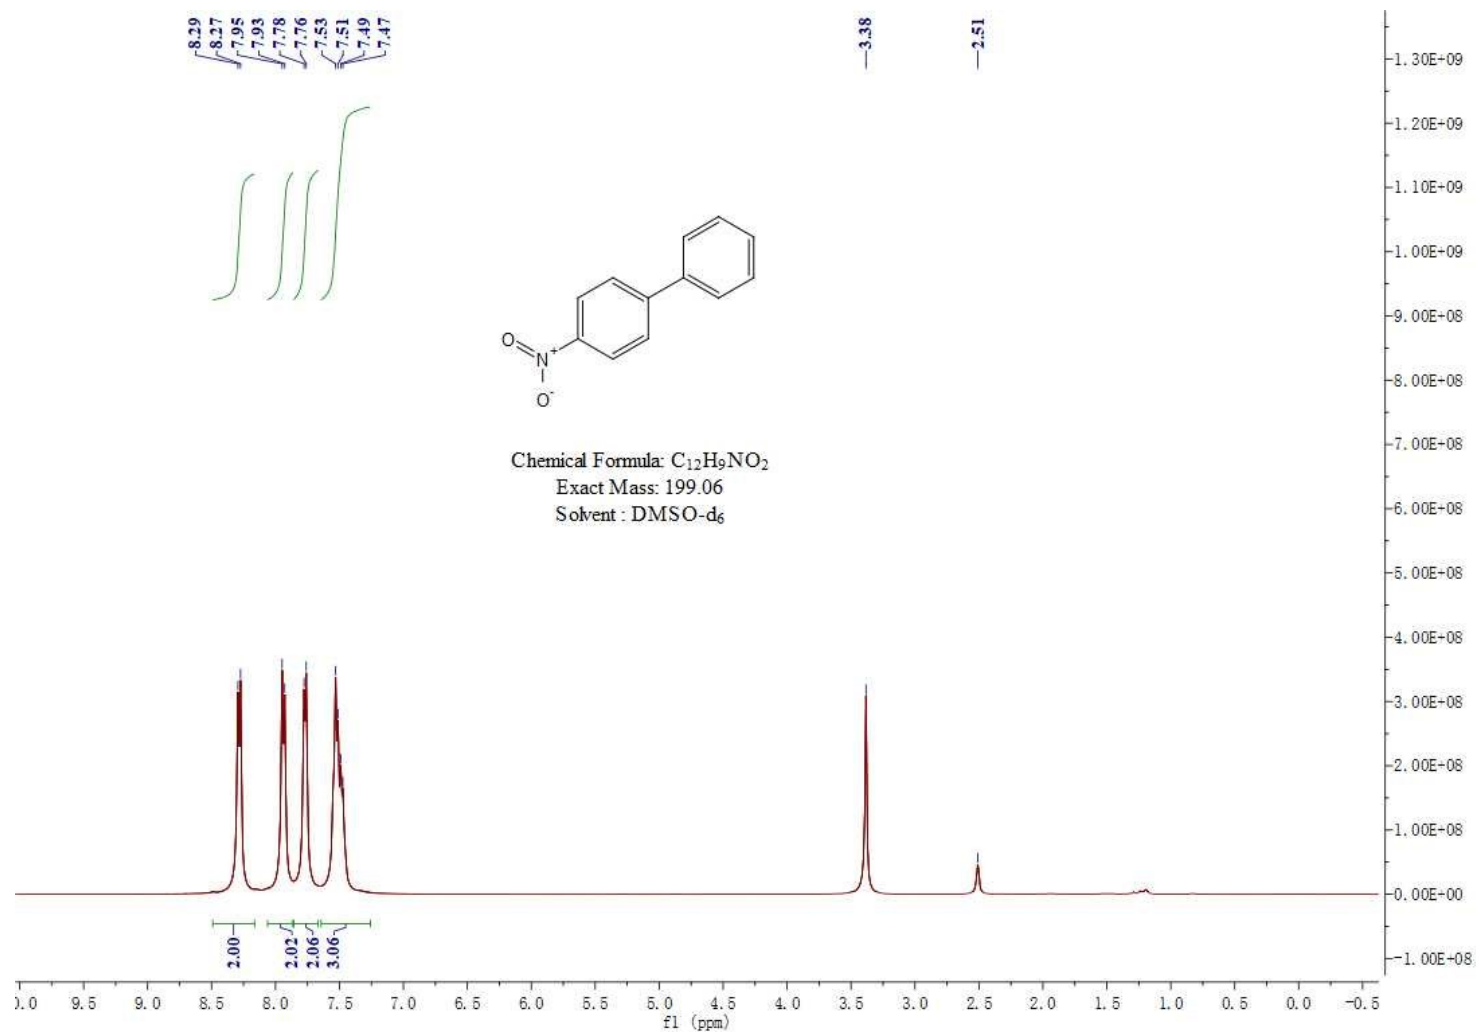

Fig. S26 The <sup>1</sup>H NMR spectrum of X7-9

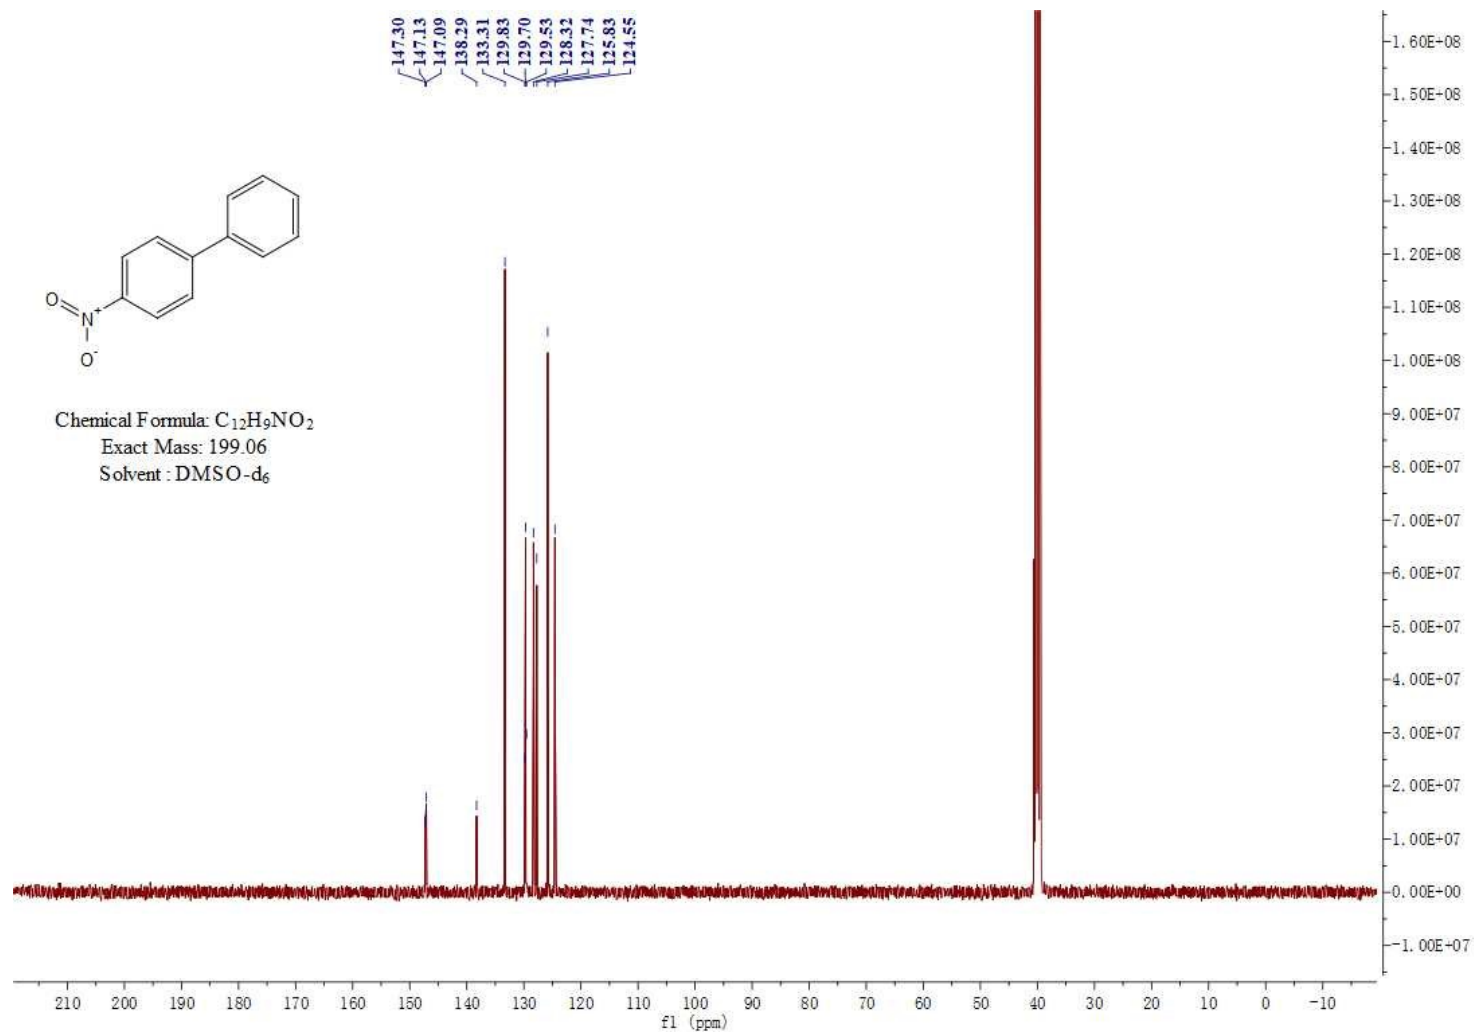

Fig. S27. The <sup>13</sup>C NMR spectrum of X7-9



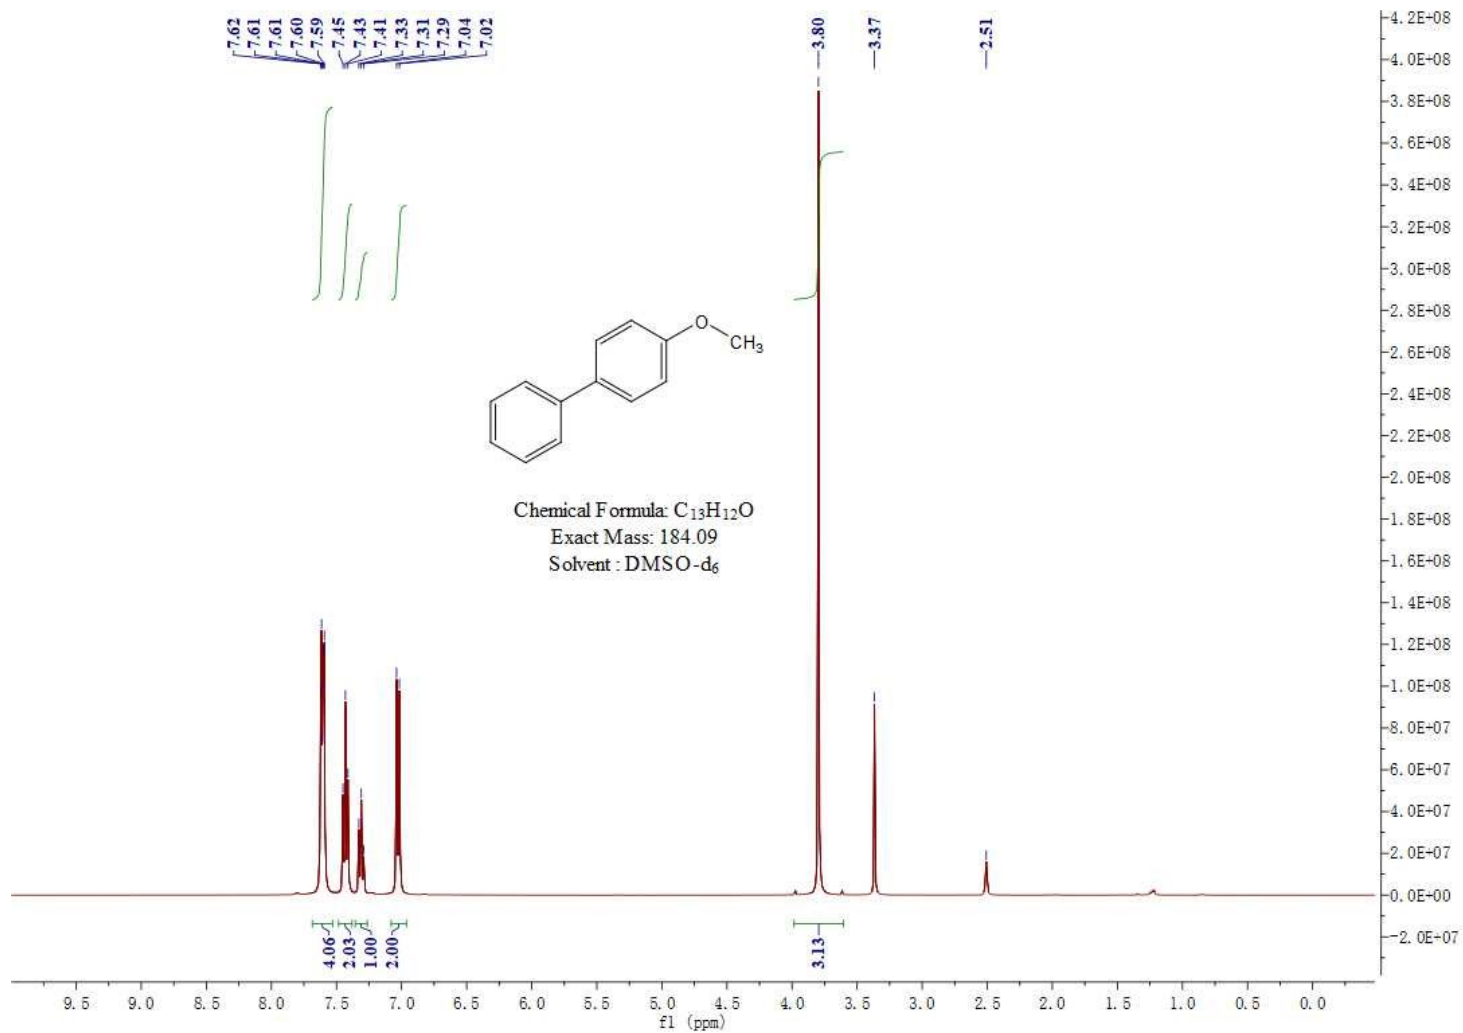

Fig. S28. The <sup>1</sup>H NMR spectrum of X10-12; B1

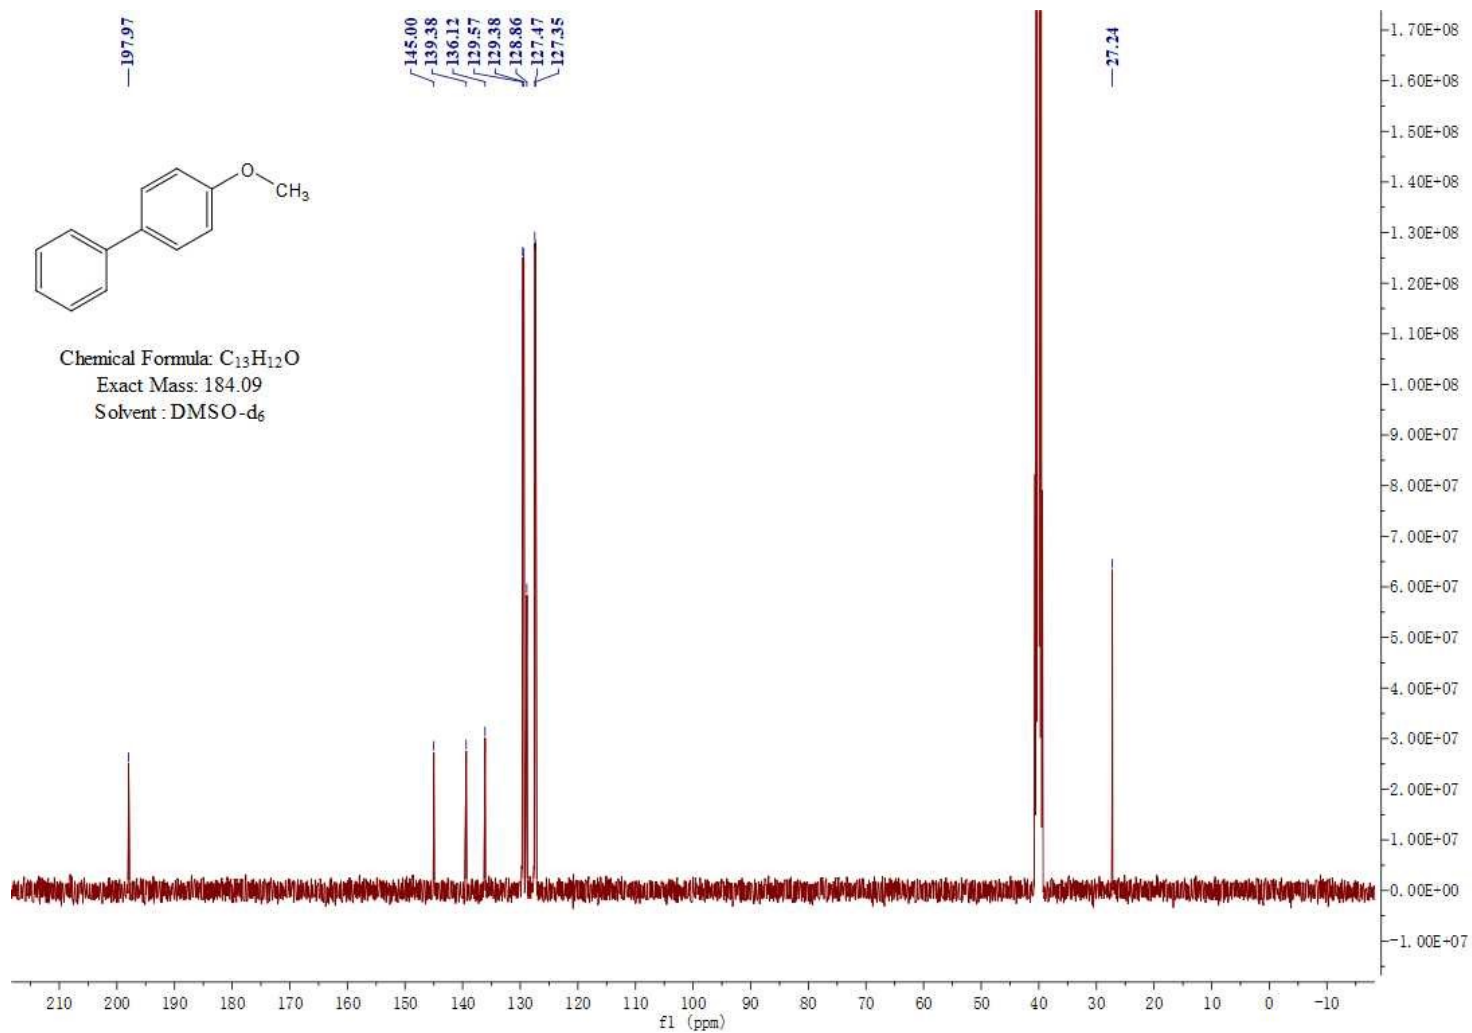

Fig. S29. The <sup>13</sup>C NMR spectrum of X10-12; B1

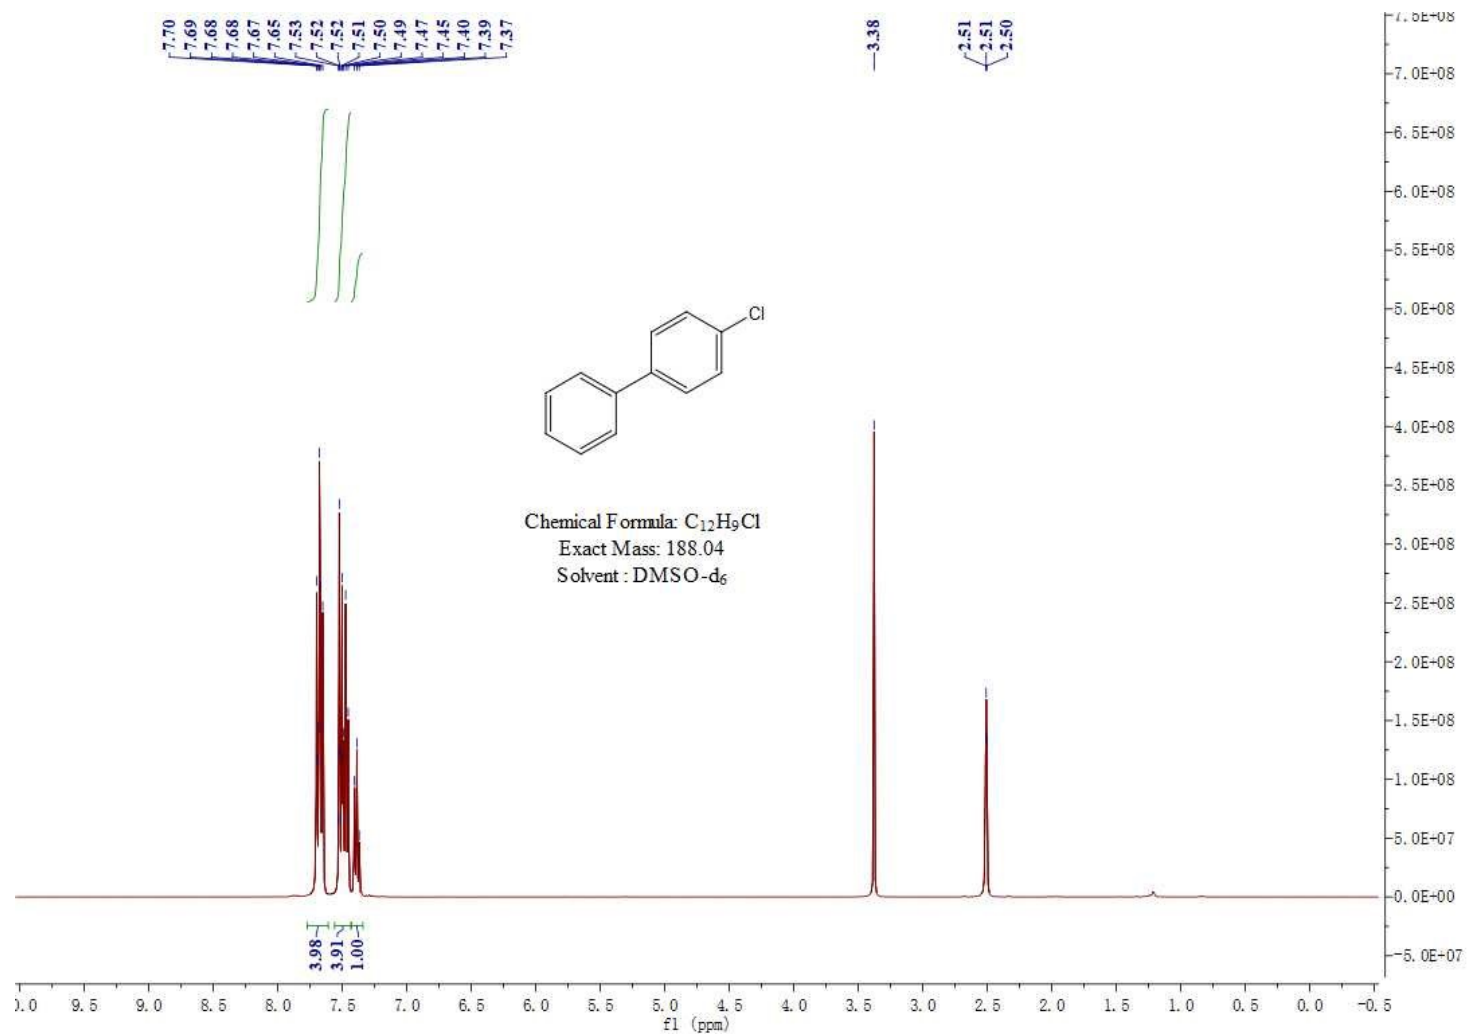

Fig. S30. The <sup>1</sup>H NMR spectrum of X13

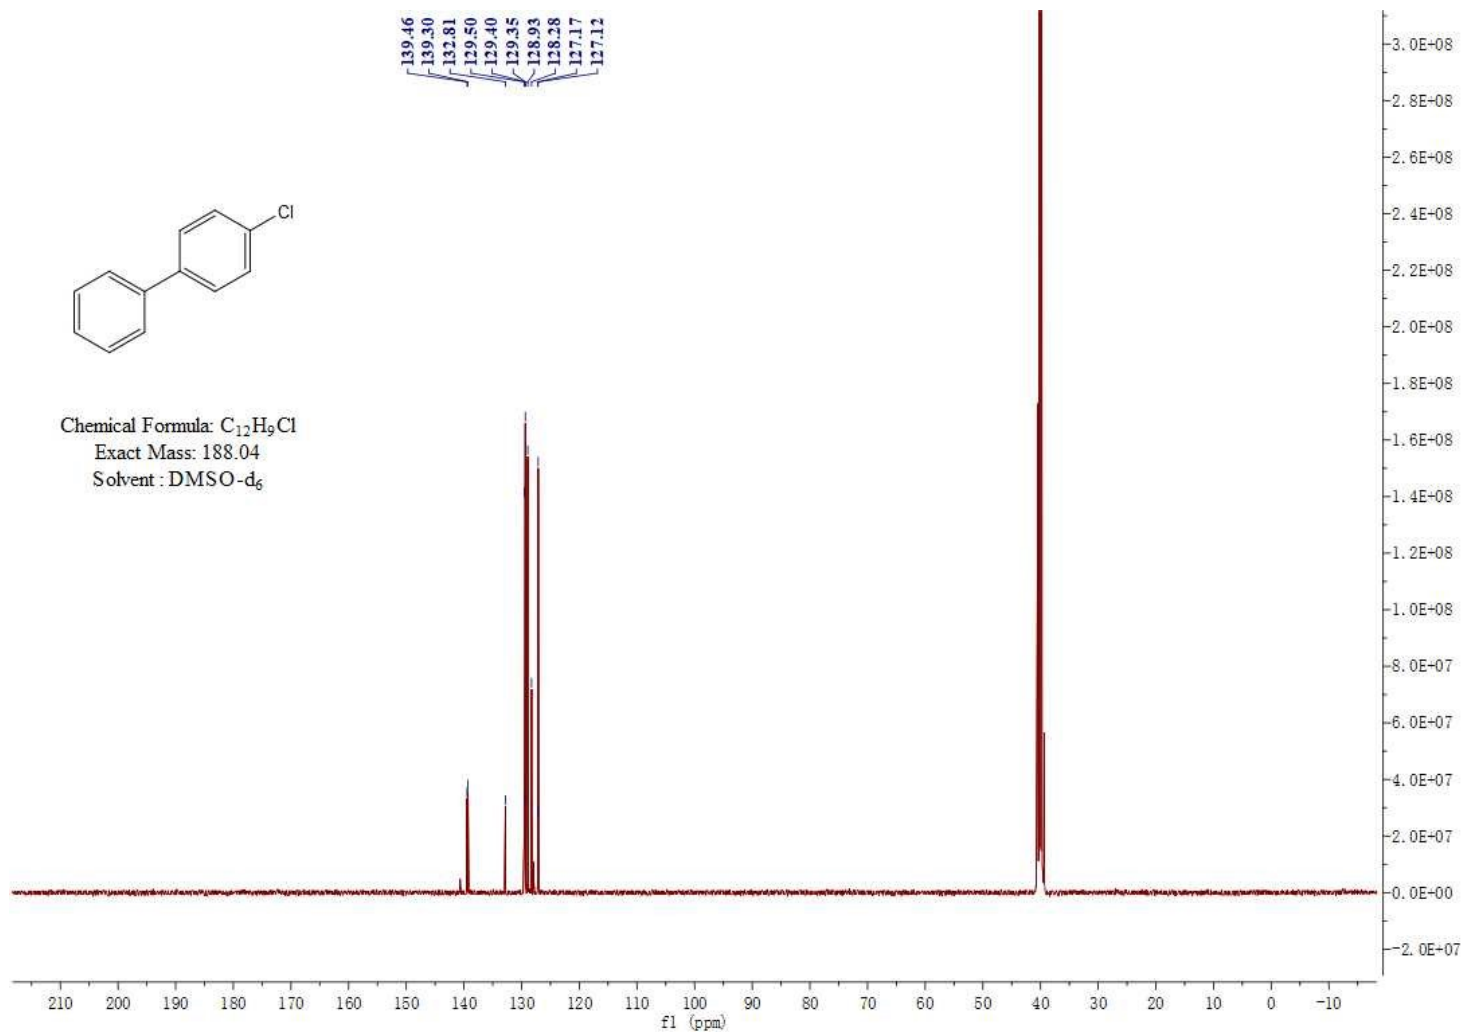

Fig. S31. The <sup>13</sup>C NMR spectrum of X13

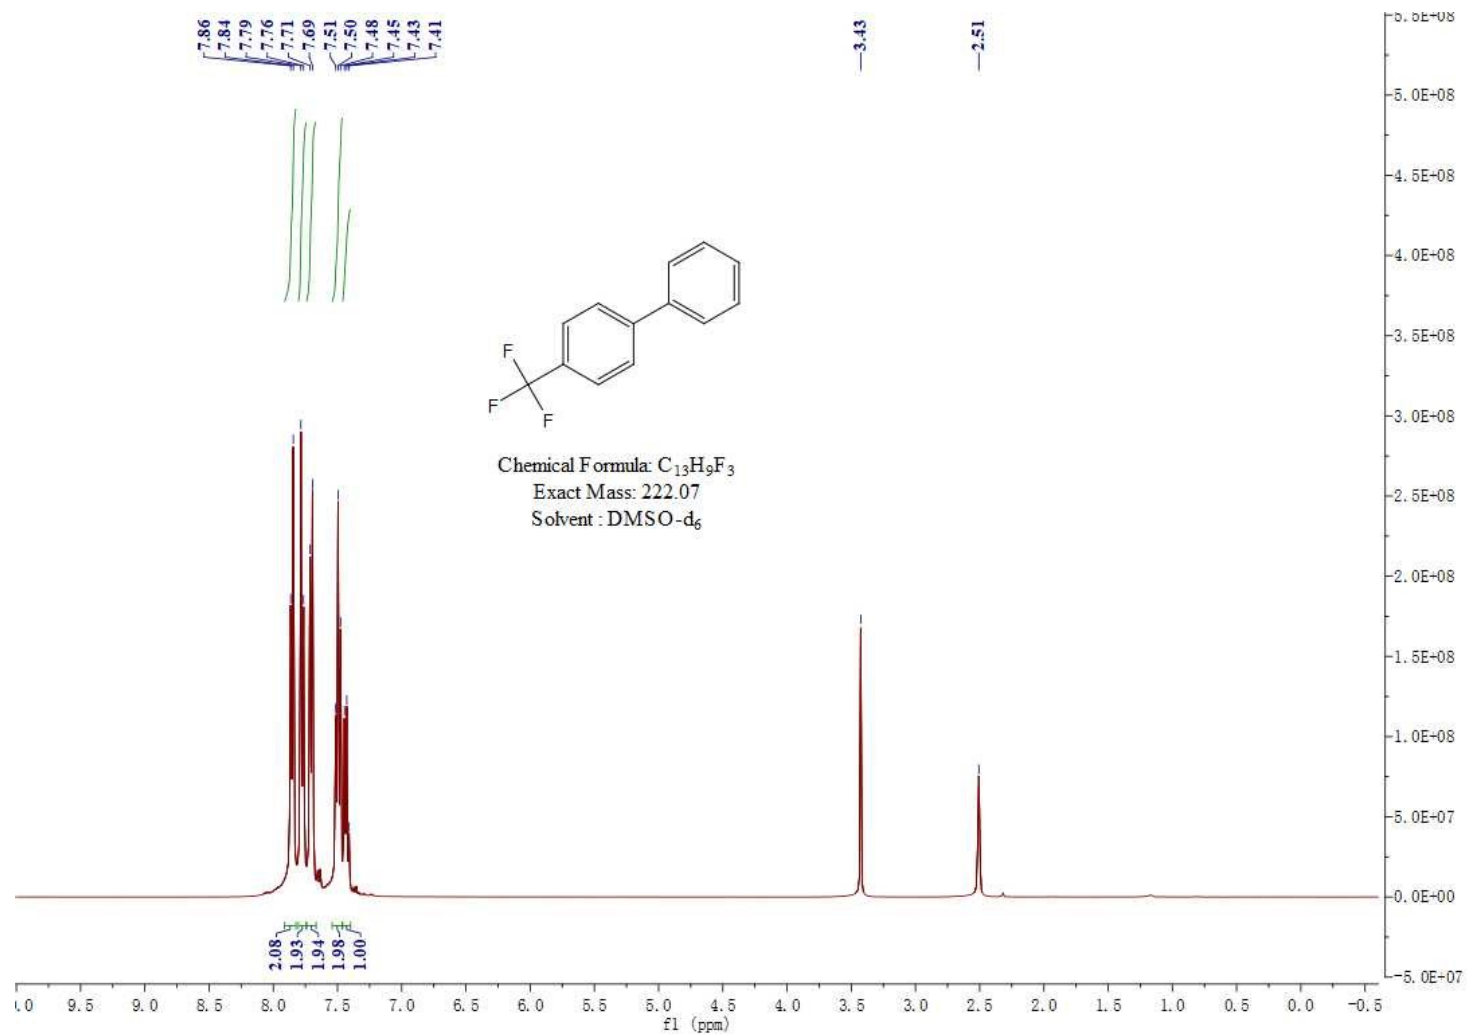

Fig. S32. The  $^1H$  NMR spectrum of X14

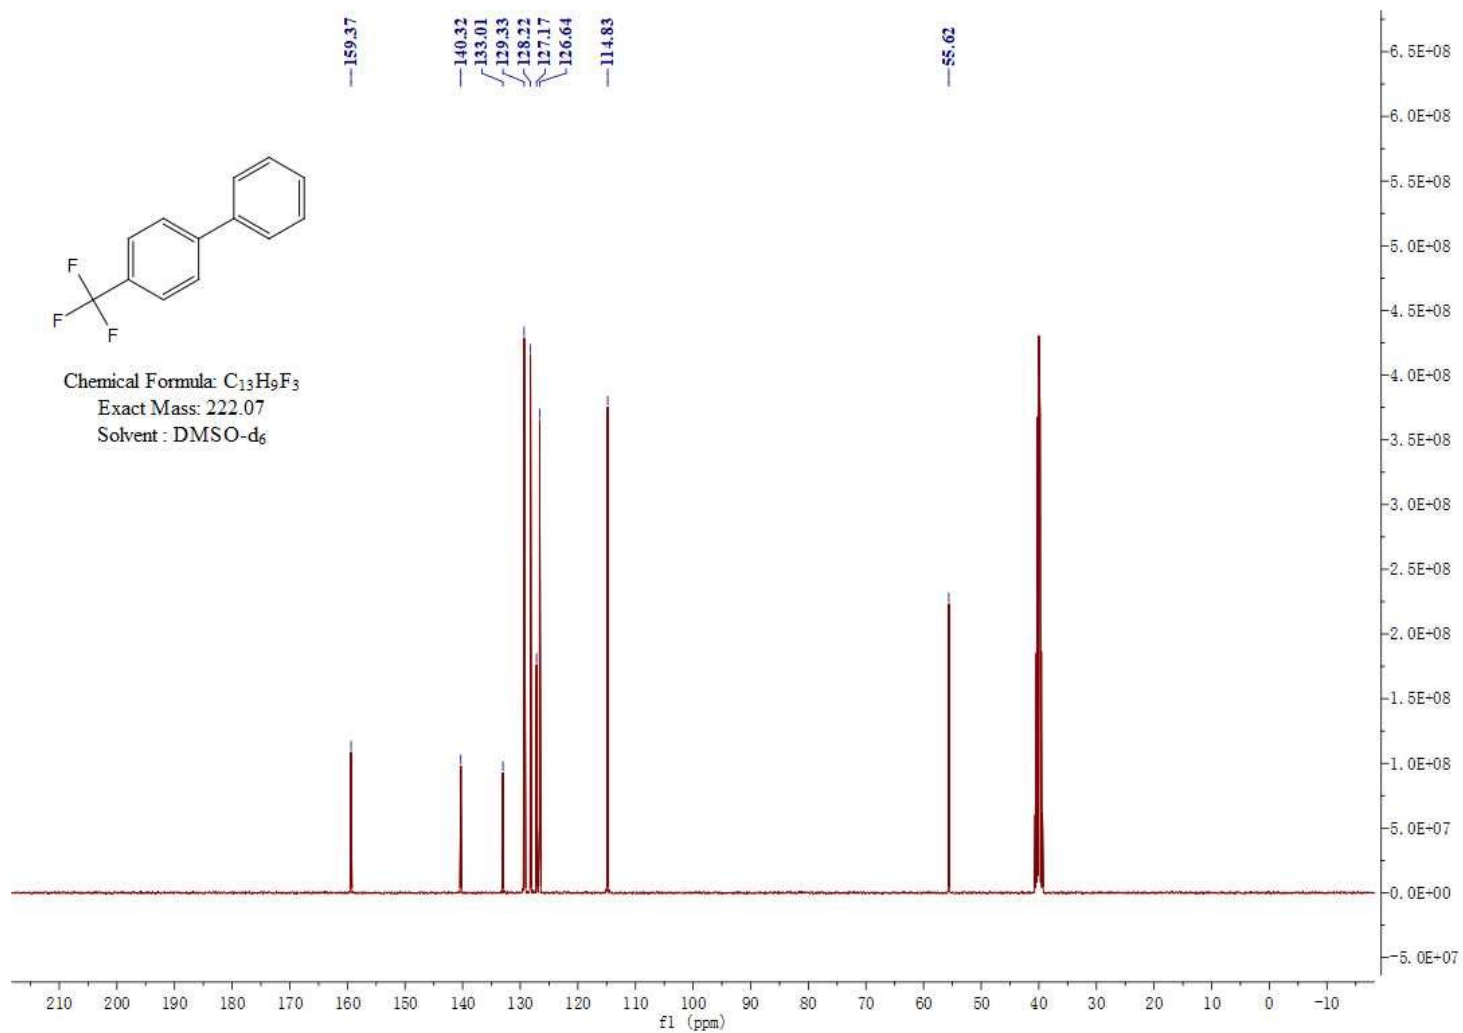

Fig. S33. The <sup>13</sup>C NMR spectrum of X14

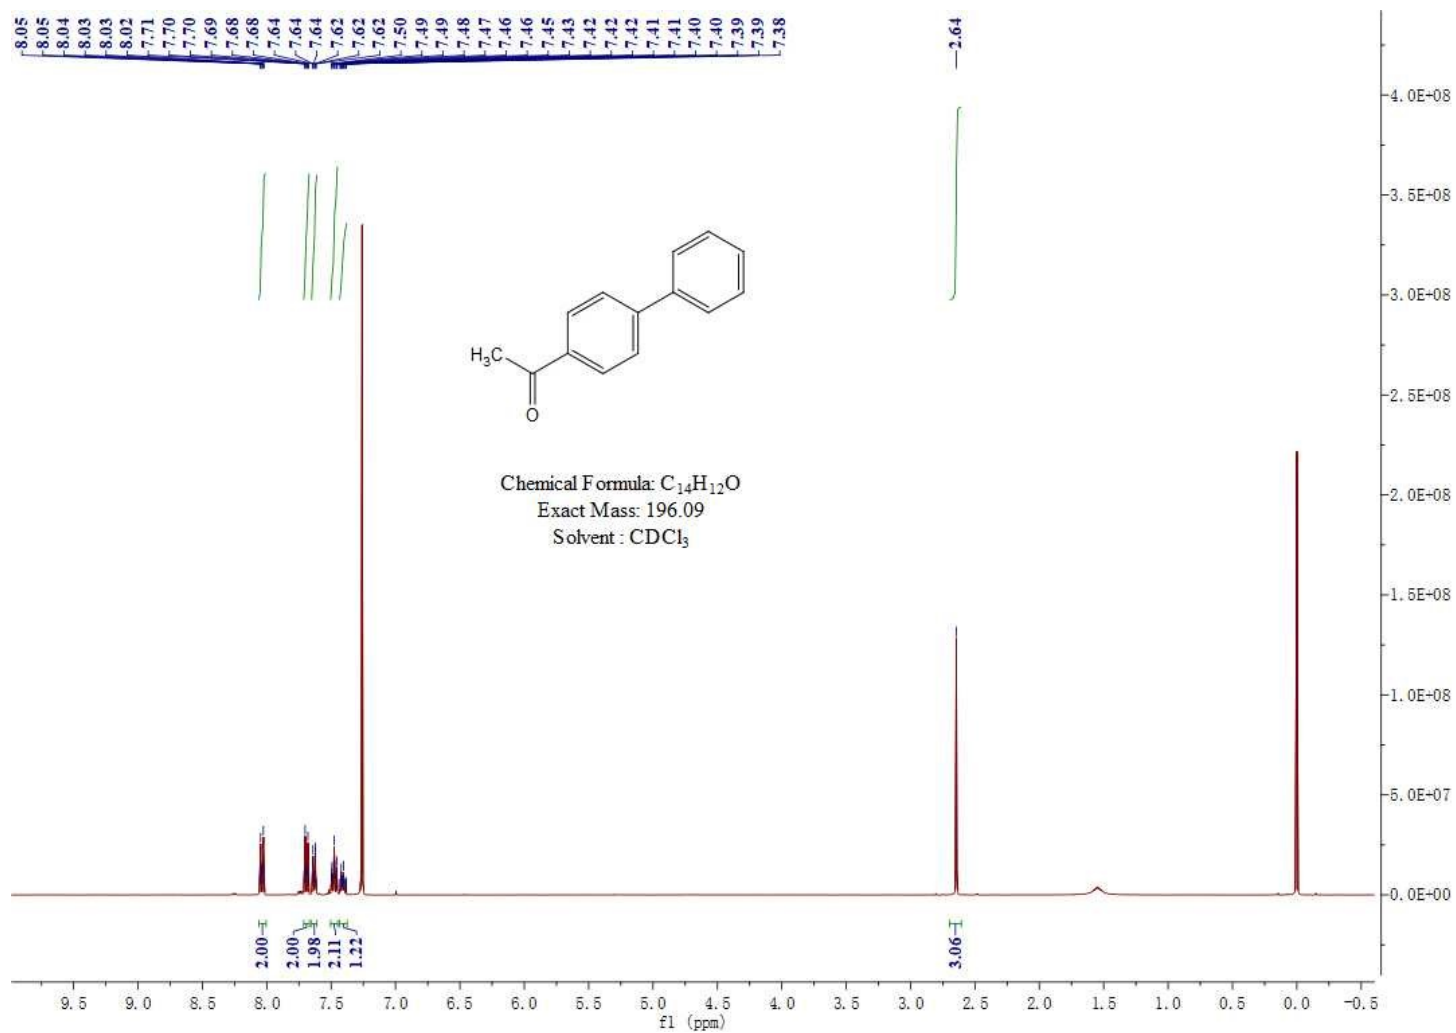

Fig. S34. The <sup>1</sup>H NMR spectrum of X15

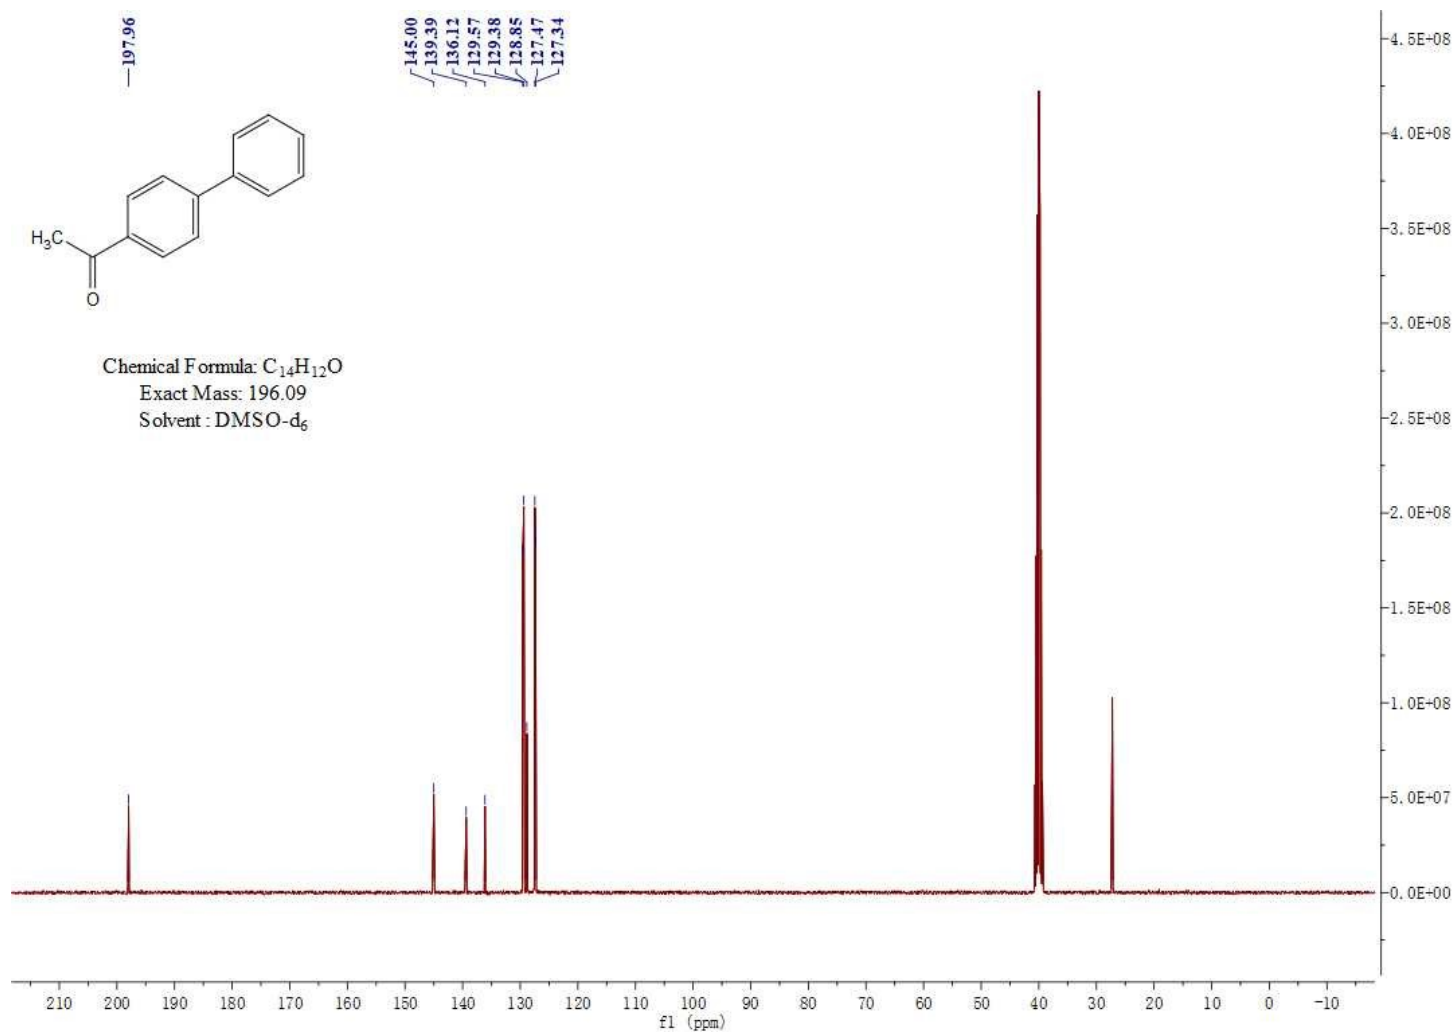

Fig. S35. The <sup>13</sup>C NMR spectrum of X15



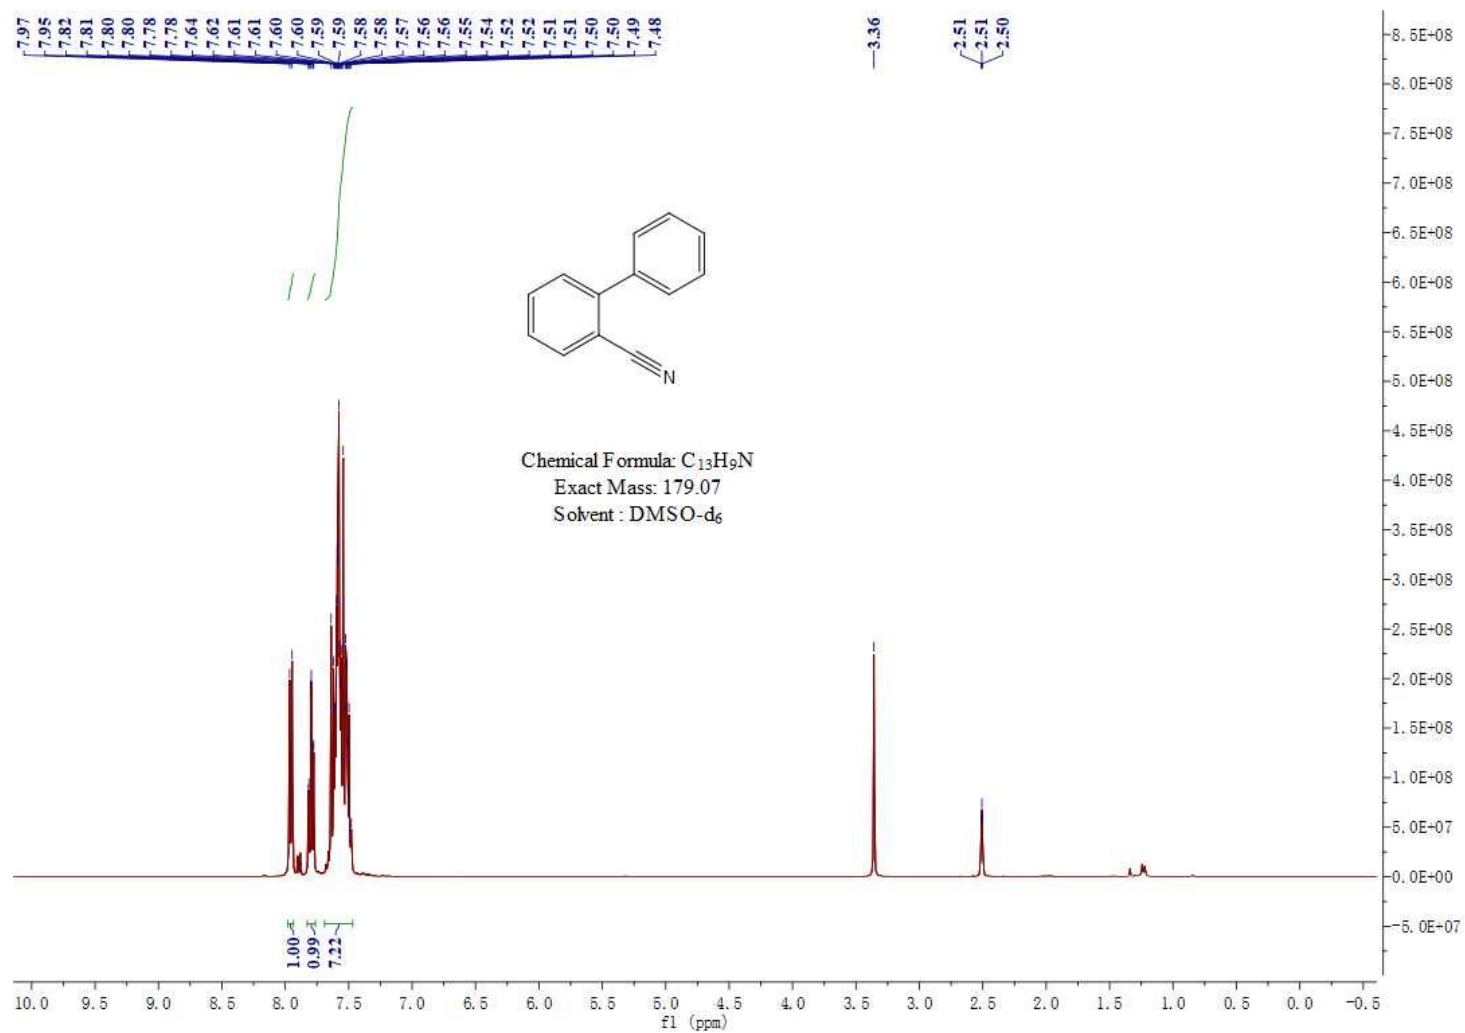

Fig. S36. The <sup>1</sup>H NMR spectrum of X16

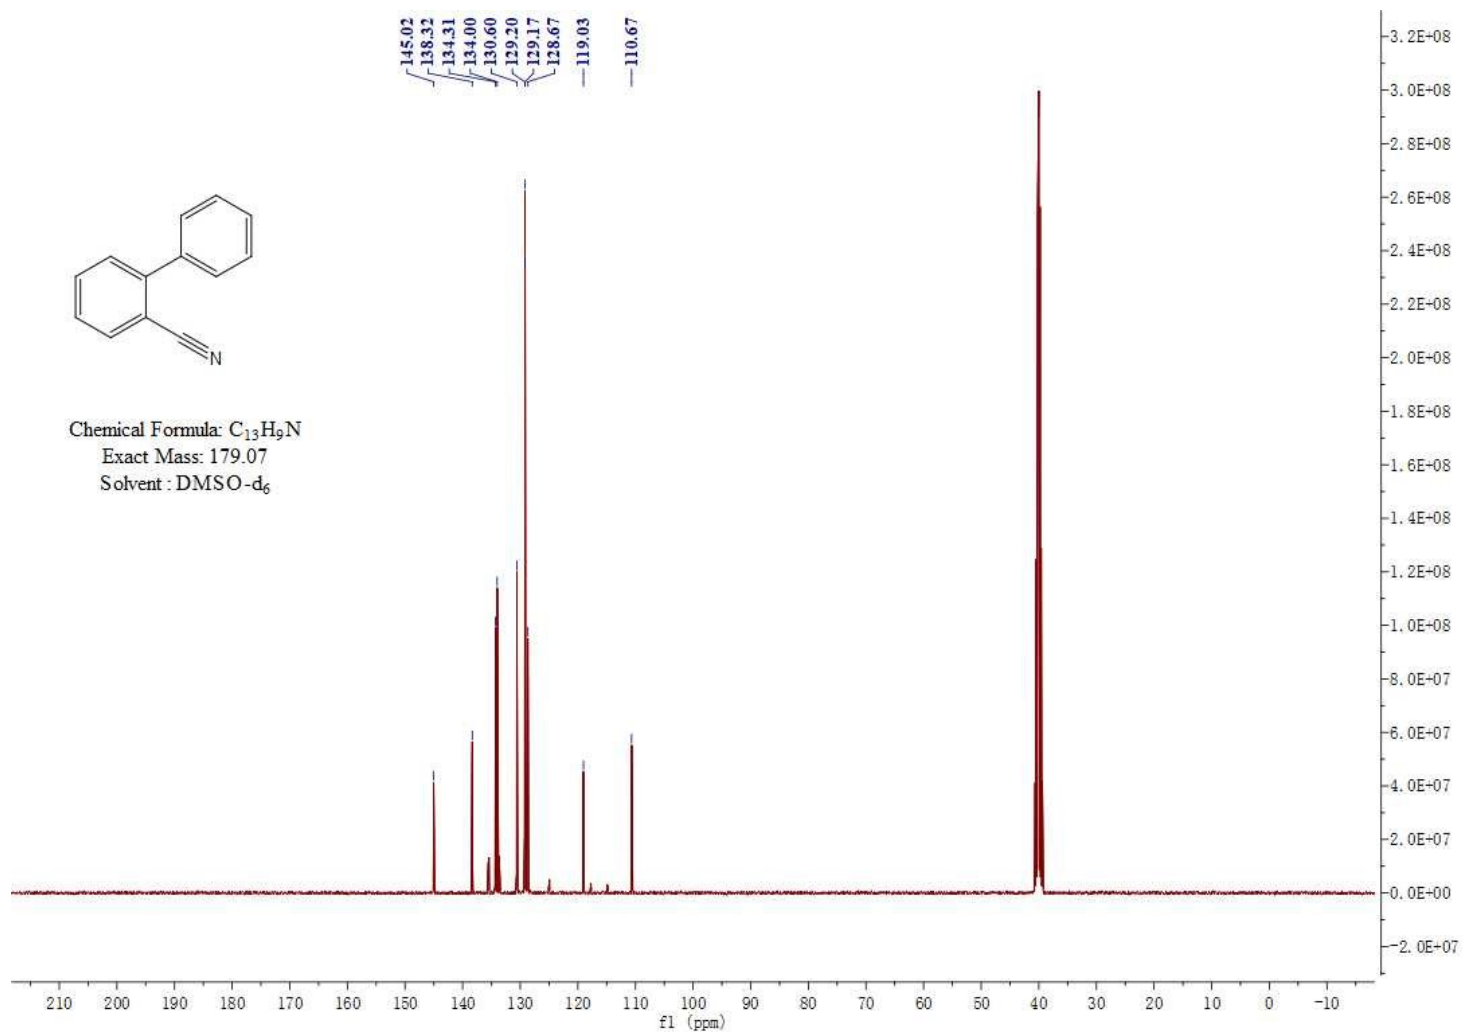

Fig. S37. The <sup>13</sup>C NMR spectrum of X16

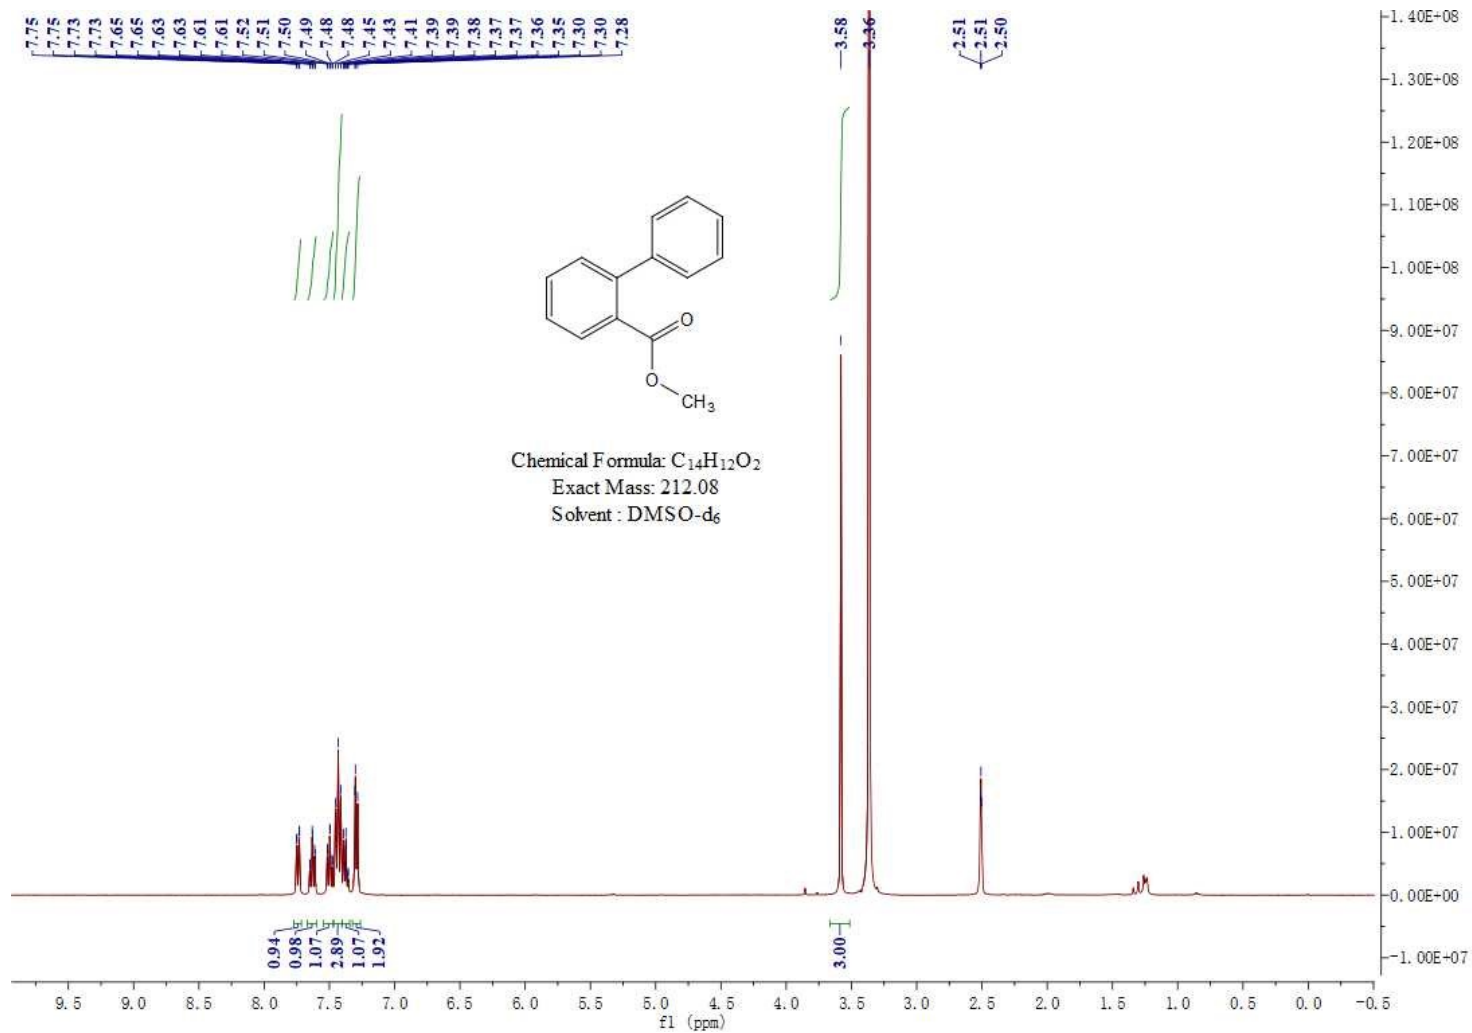

Fig. S38. The <sup>1</sup>H NMR spectrum of X17

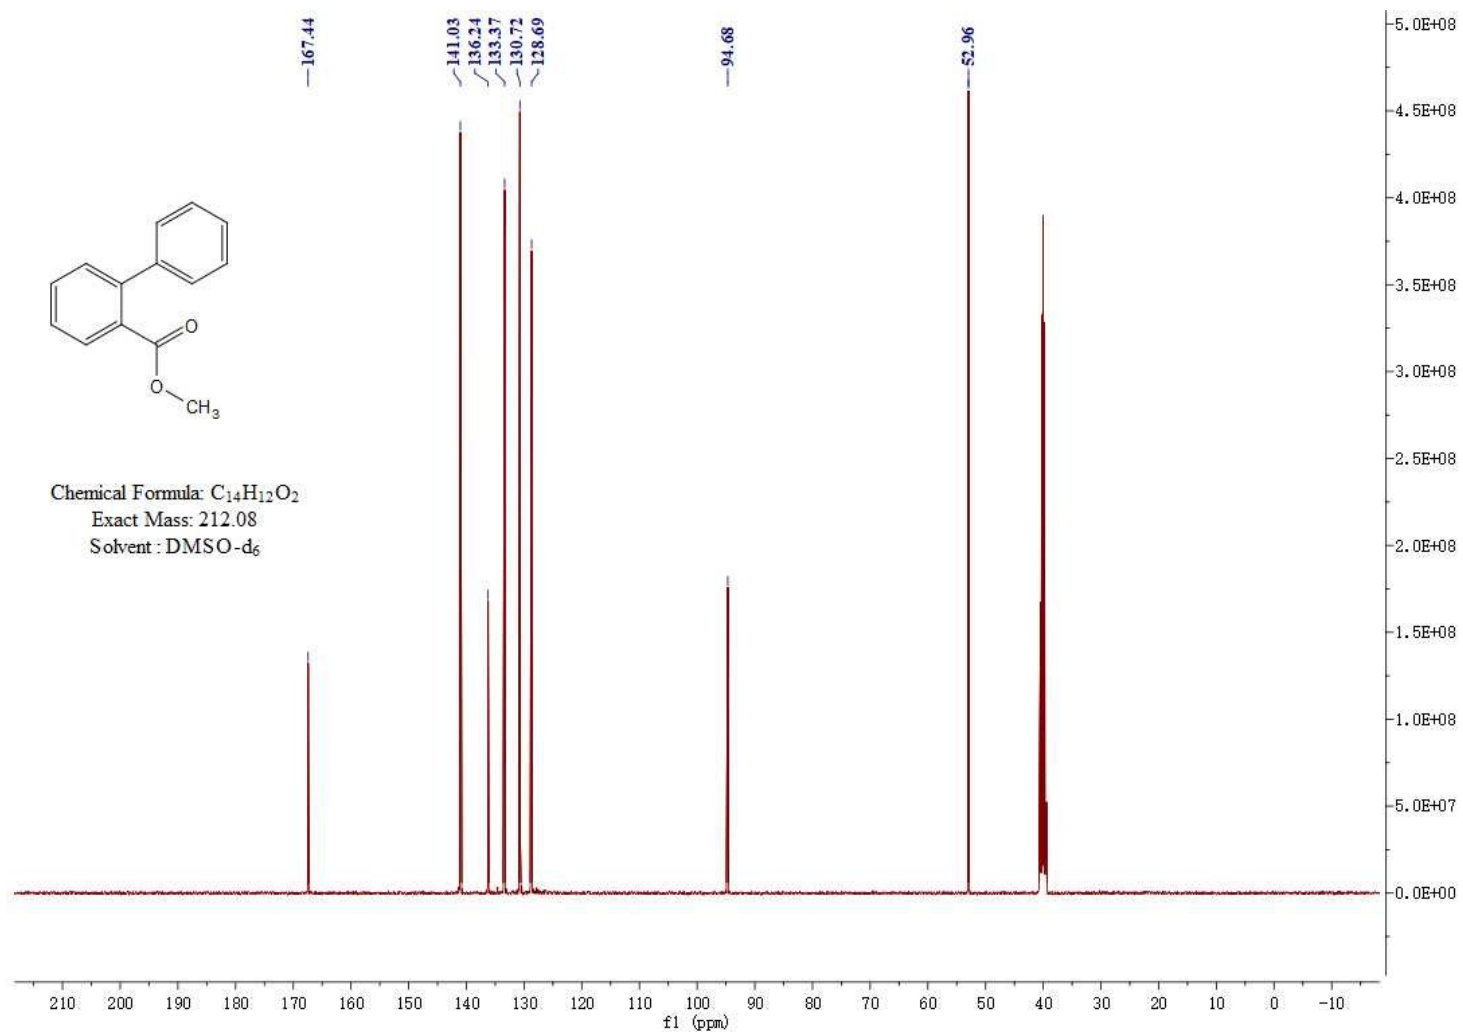

Fig. S39. The <sup>13</sup>C NMR spectrum of X17

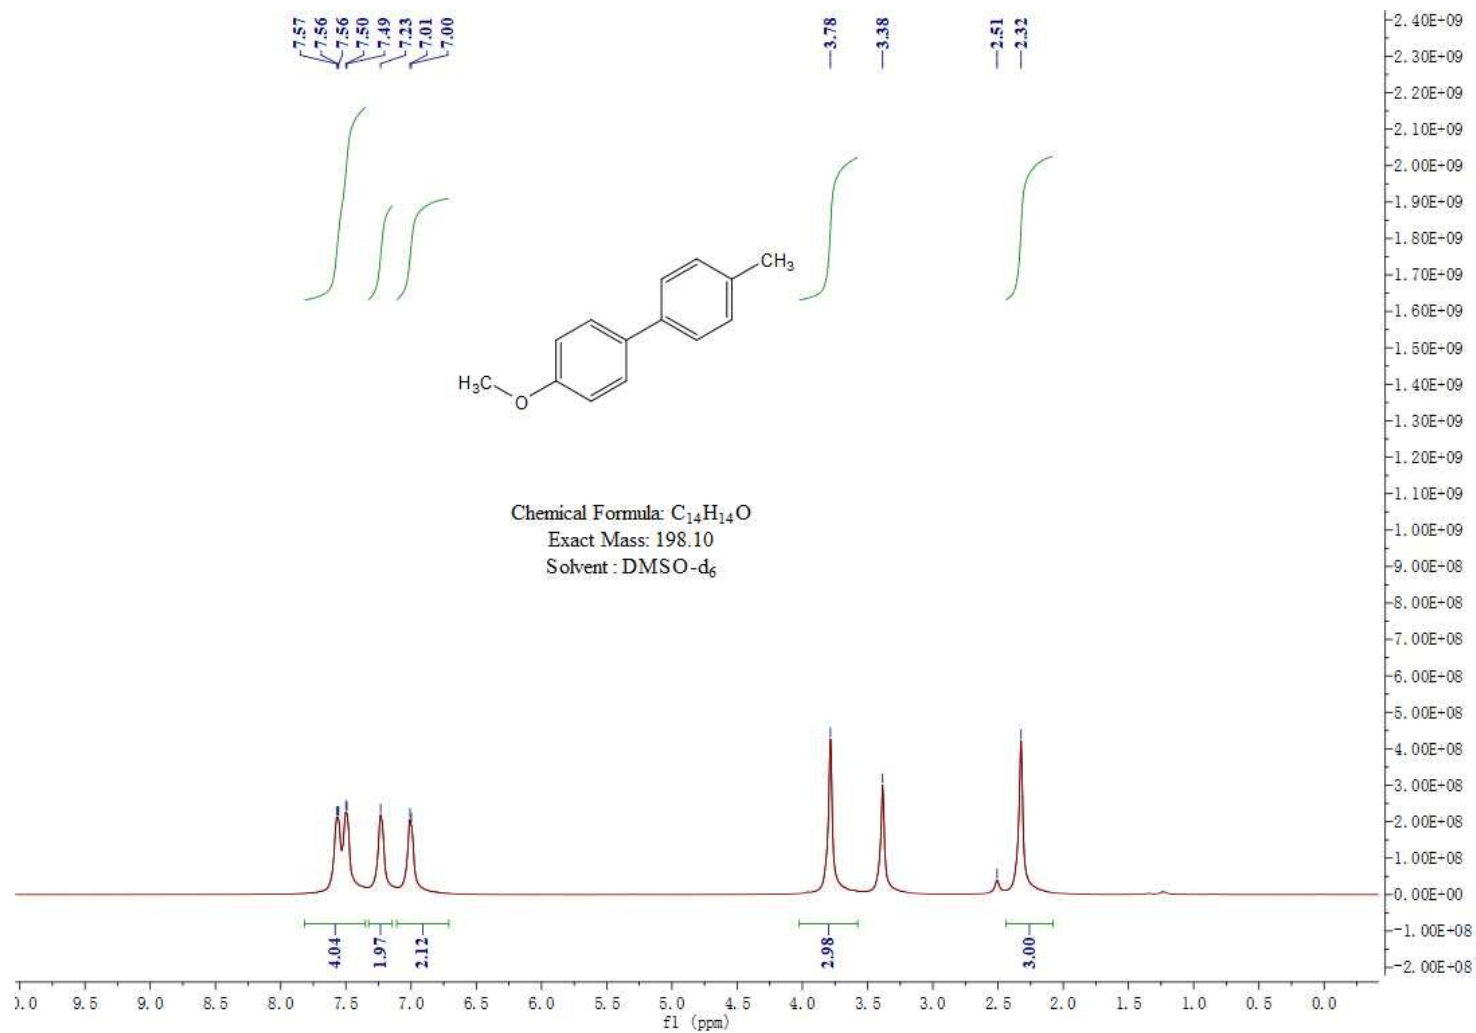

Fig. S40. The <sup>1</sup>H NMR spectrum of B2-3

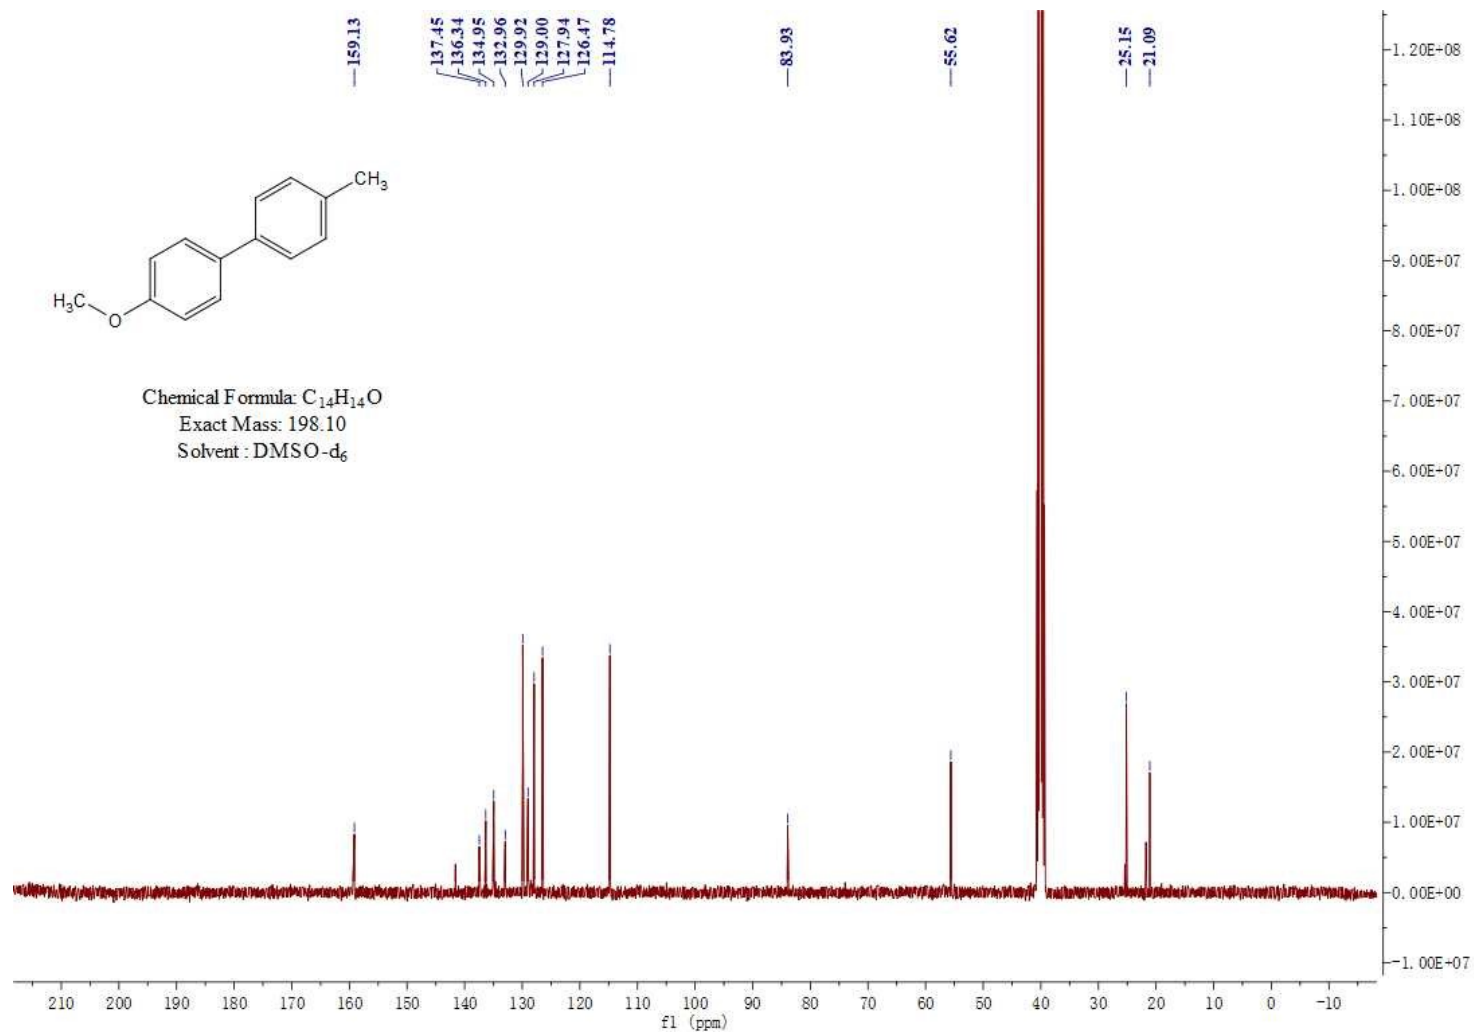

Fig. S41. The <sup>13</sup>C NMR spectrum of B2-3

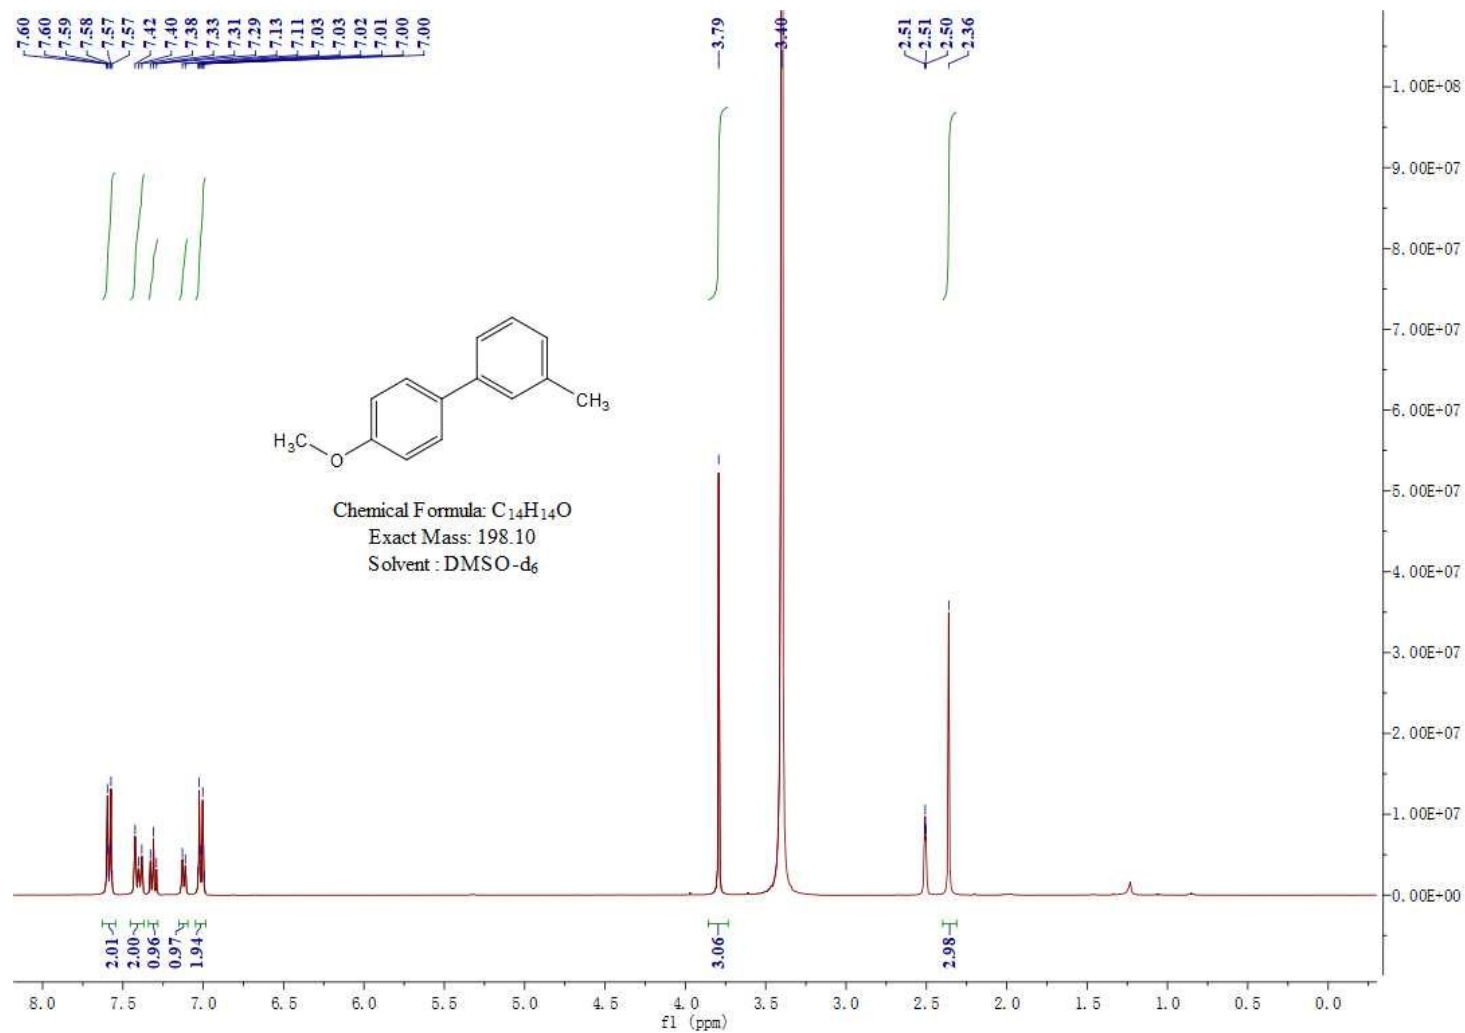

Fig. S42. The <sup>1</sup>H NMR spectrum of B4

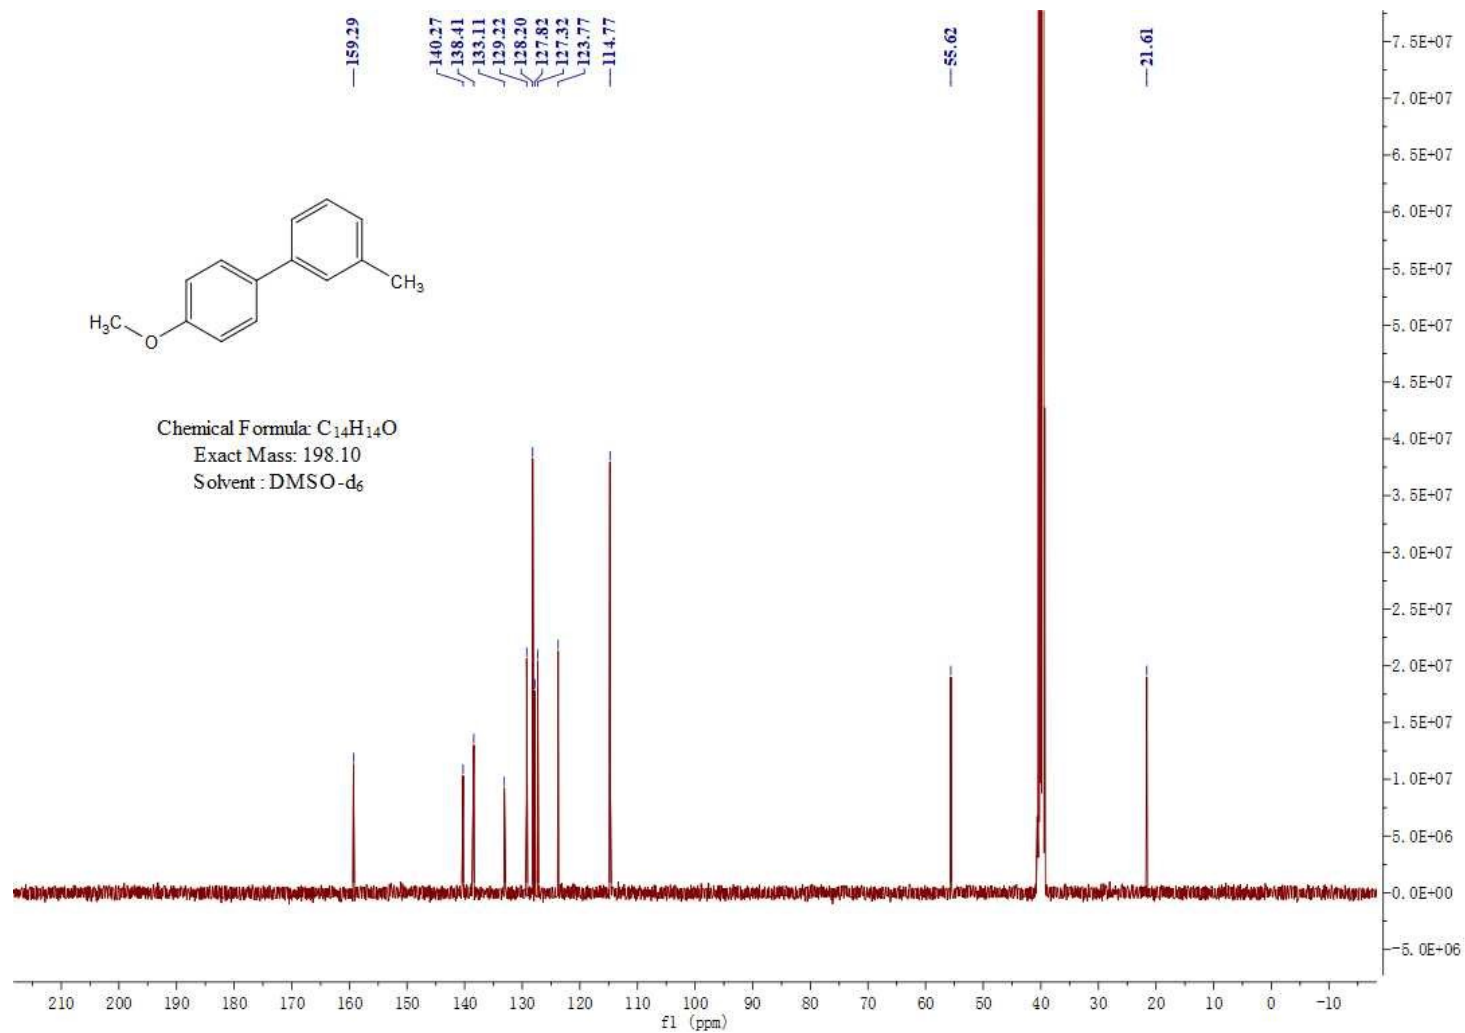

Fig. S43. The <sup>13</sup>C NMR spectrum of B4



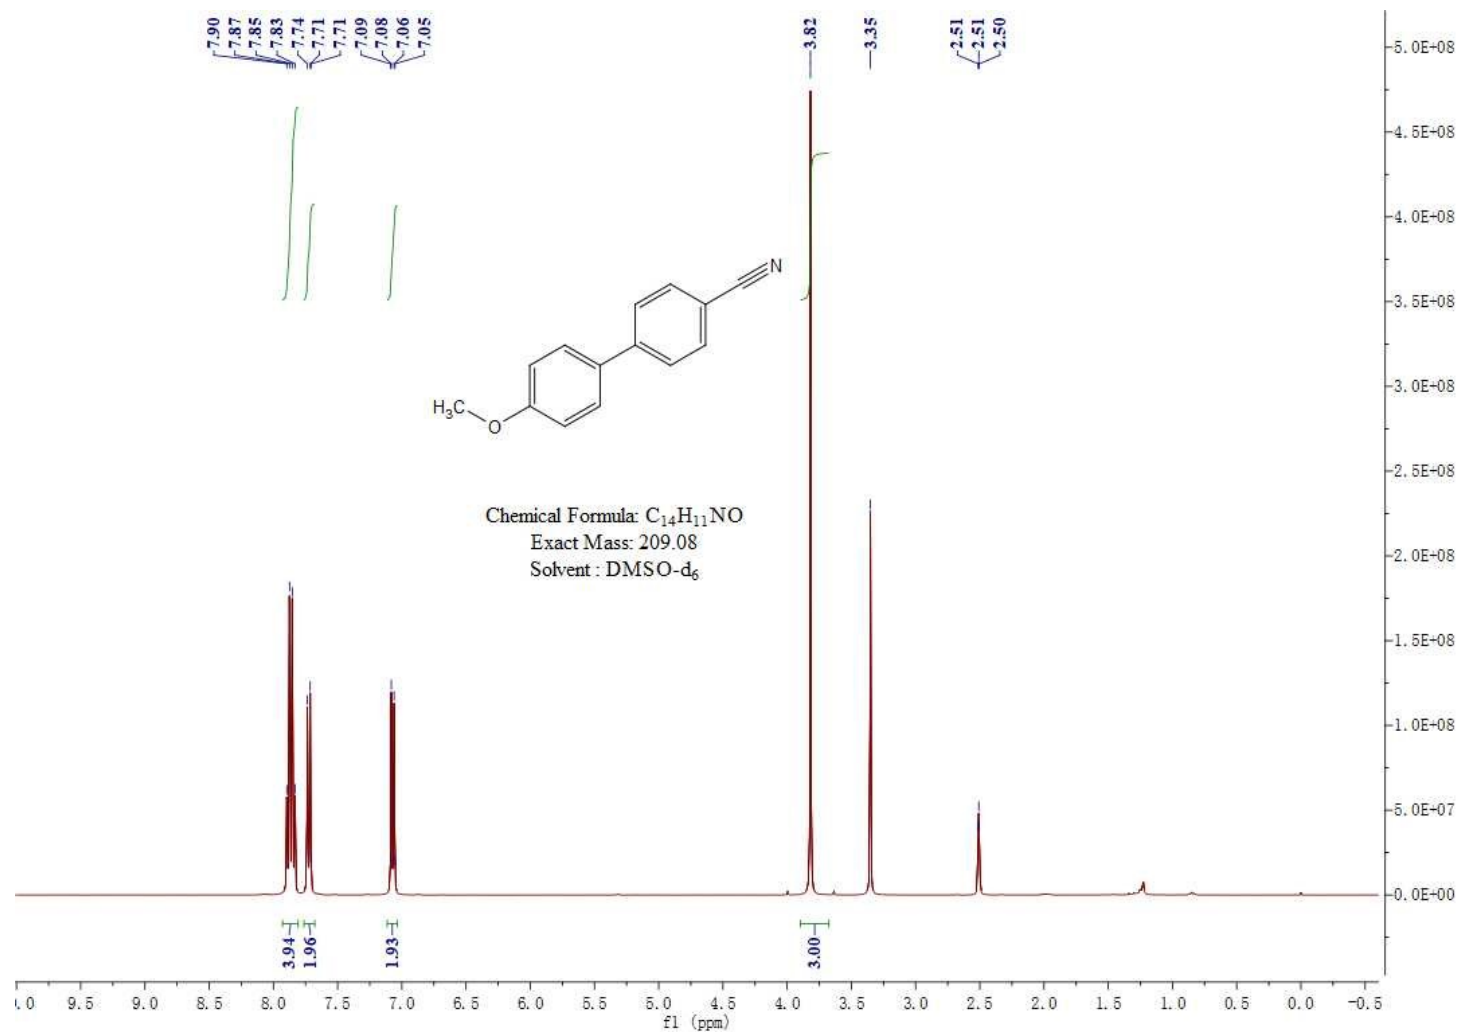

Fig. S44. The  $^1H$  NMR spectrum of B5

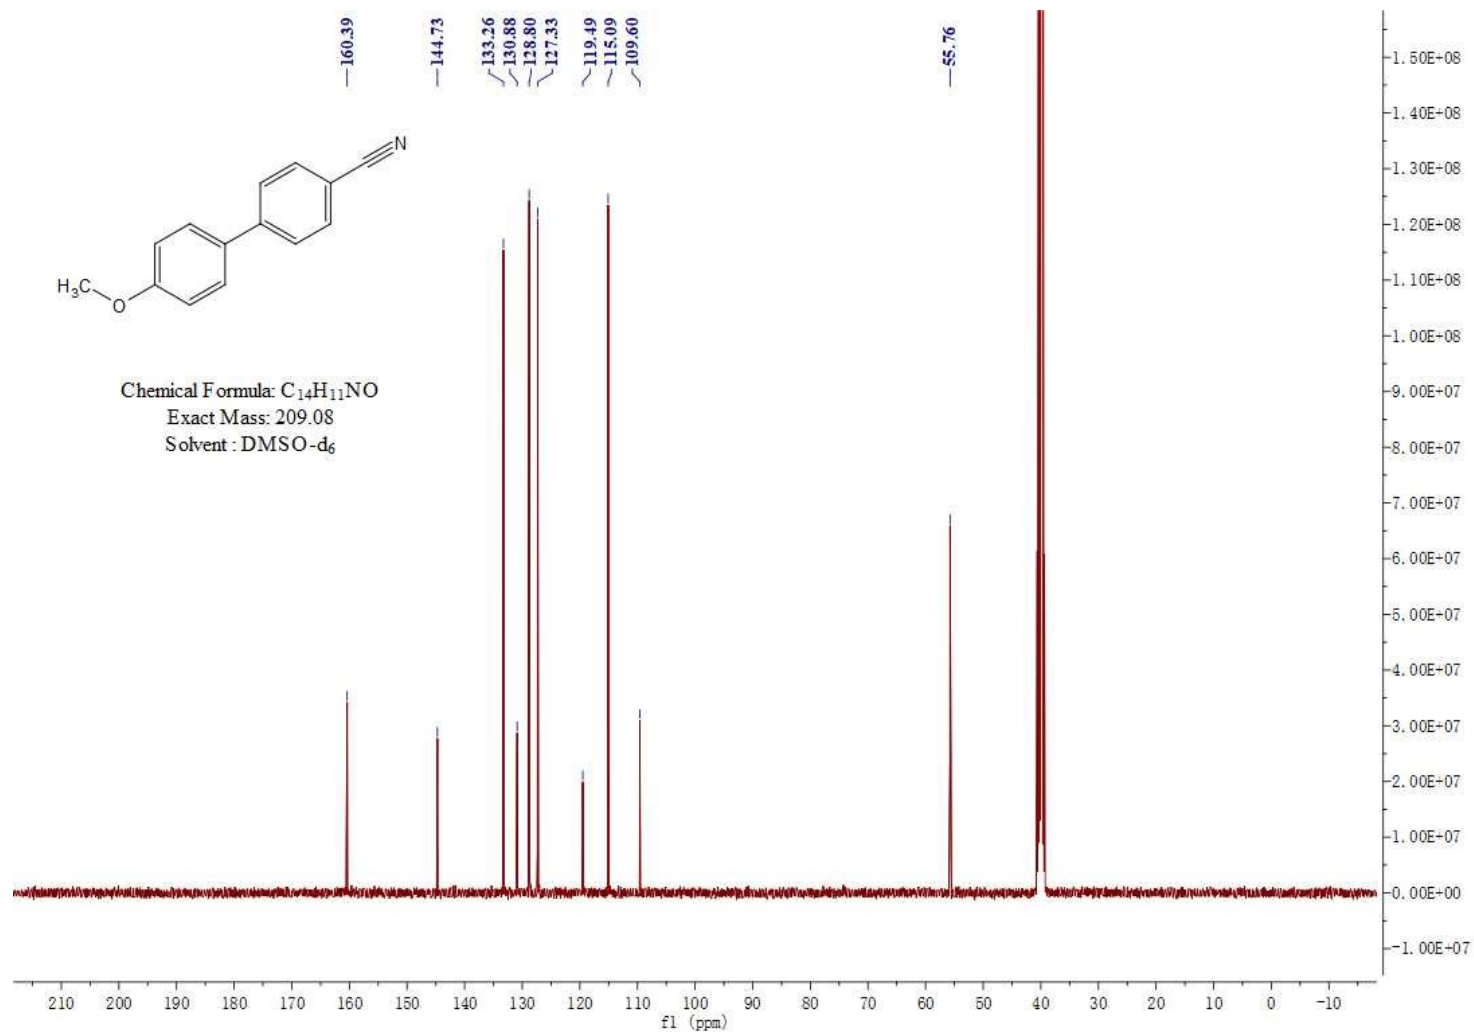

Fig. S45. The <sup>13</sup>C NMR spectrum of B5

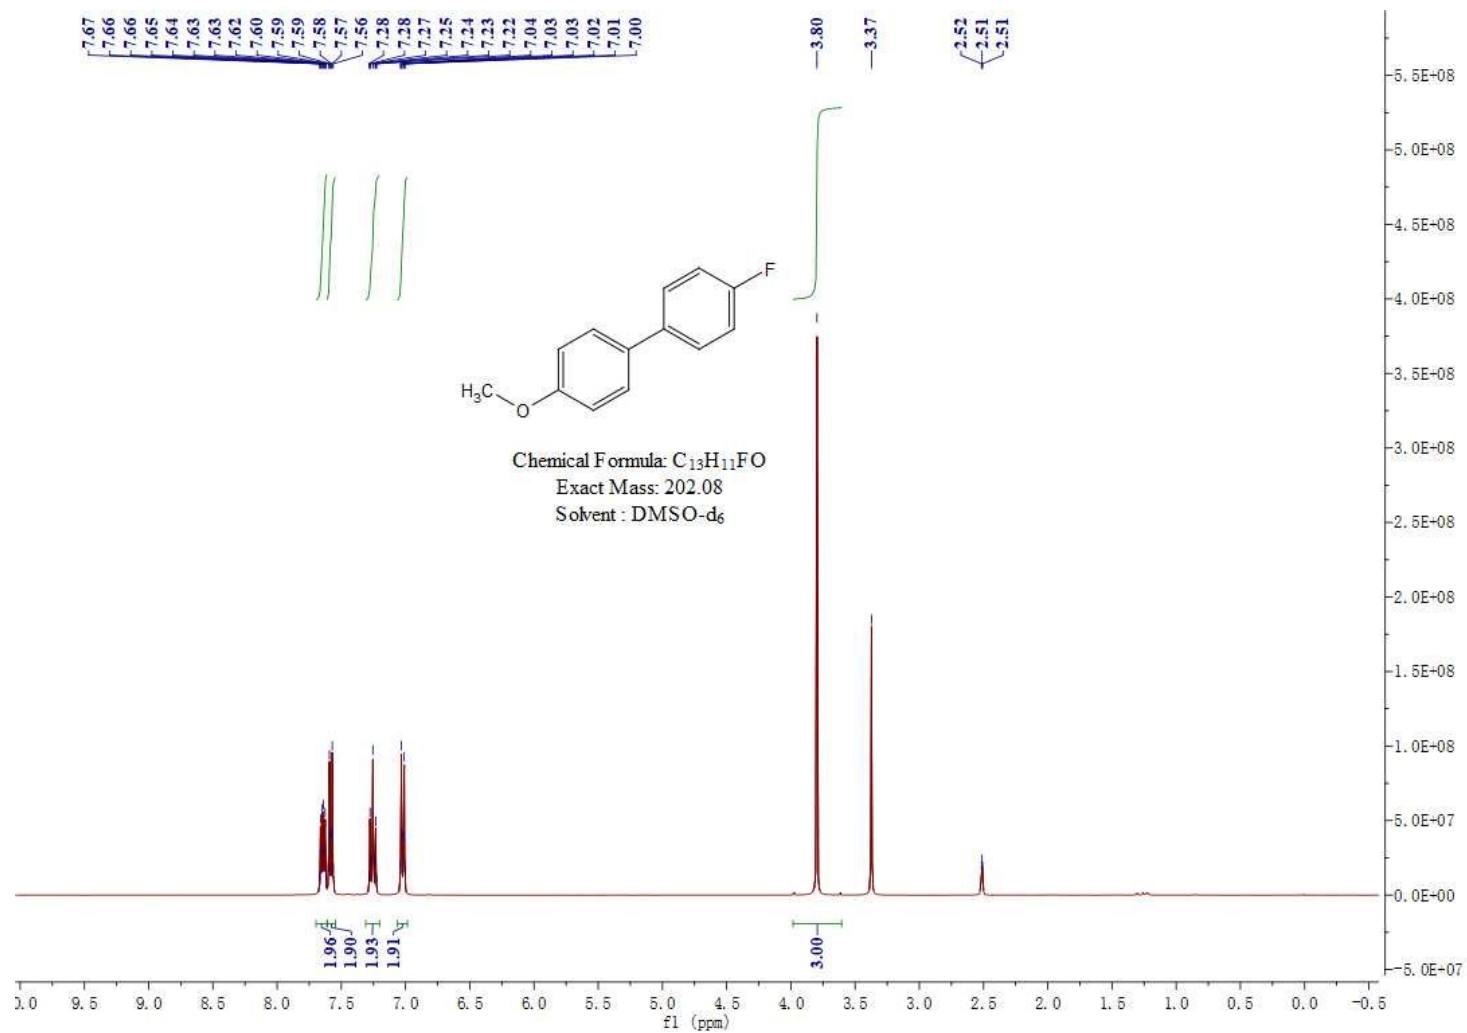

Fig. S46. The <sup>1</sup>H NMR spectrum of B6

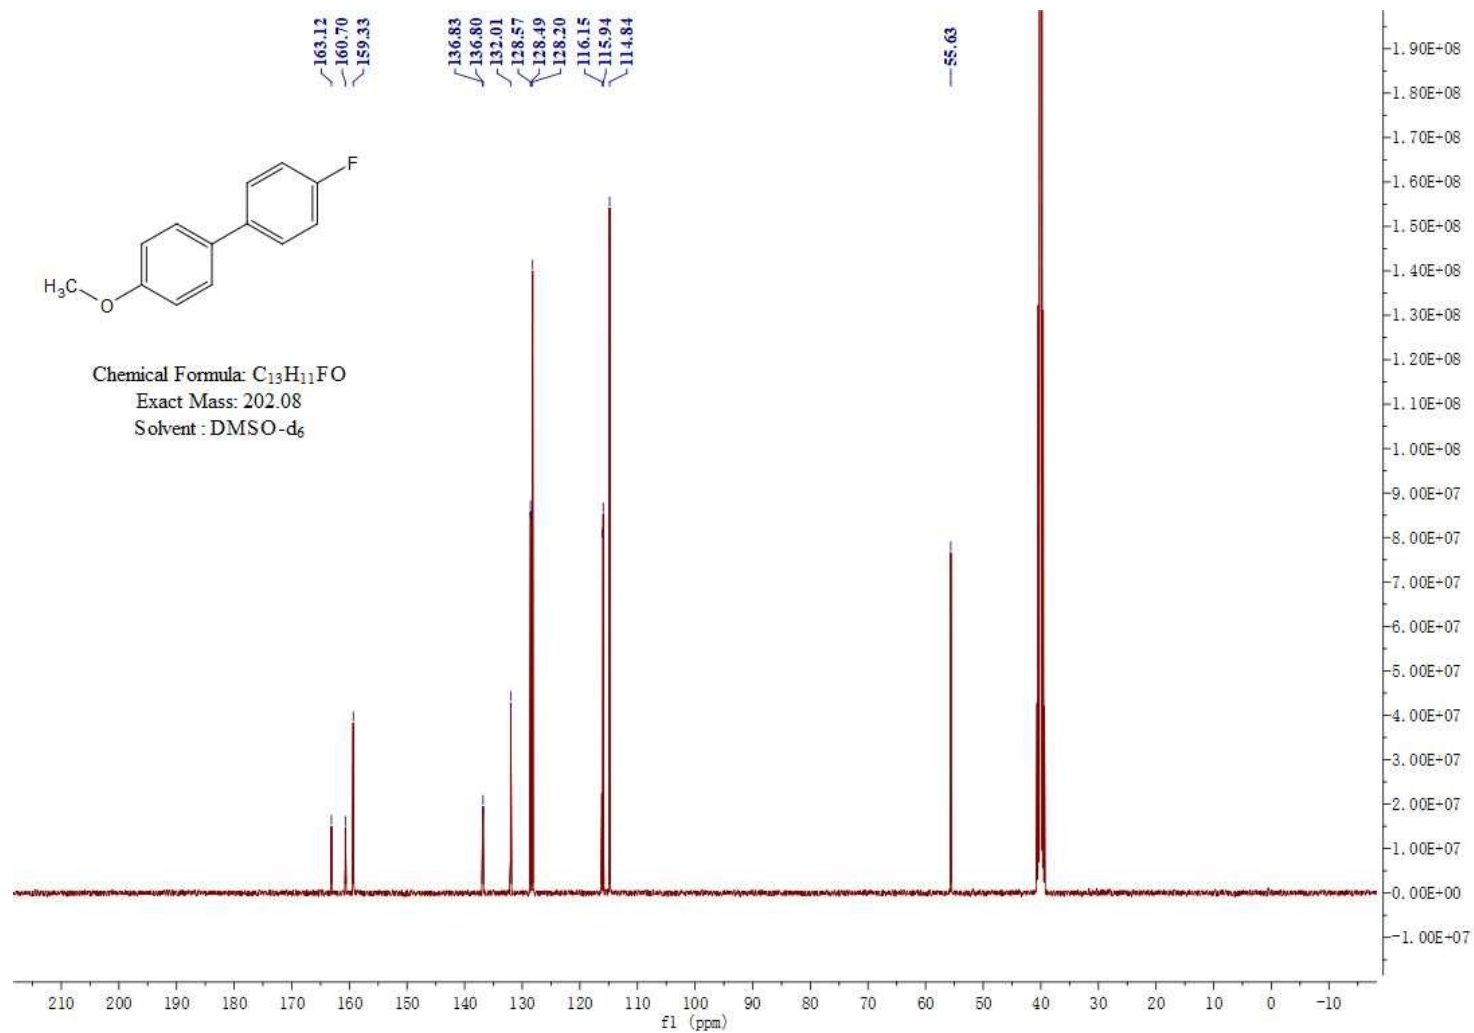

Fig. S47. The <sup>13</sup>C NMR spectrum of B6

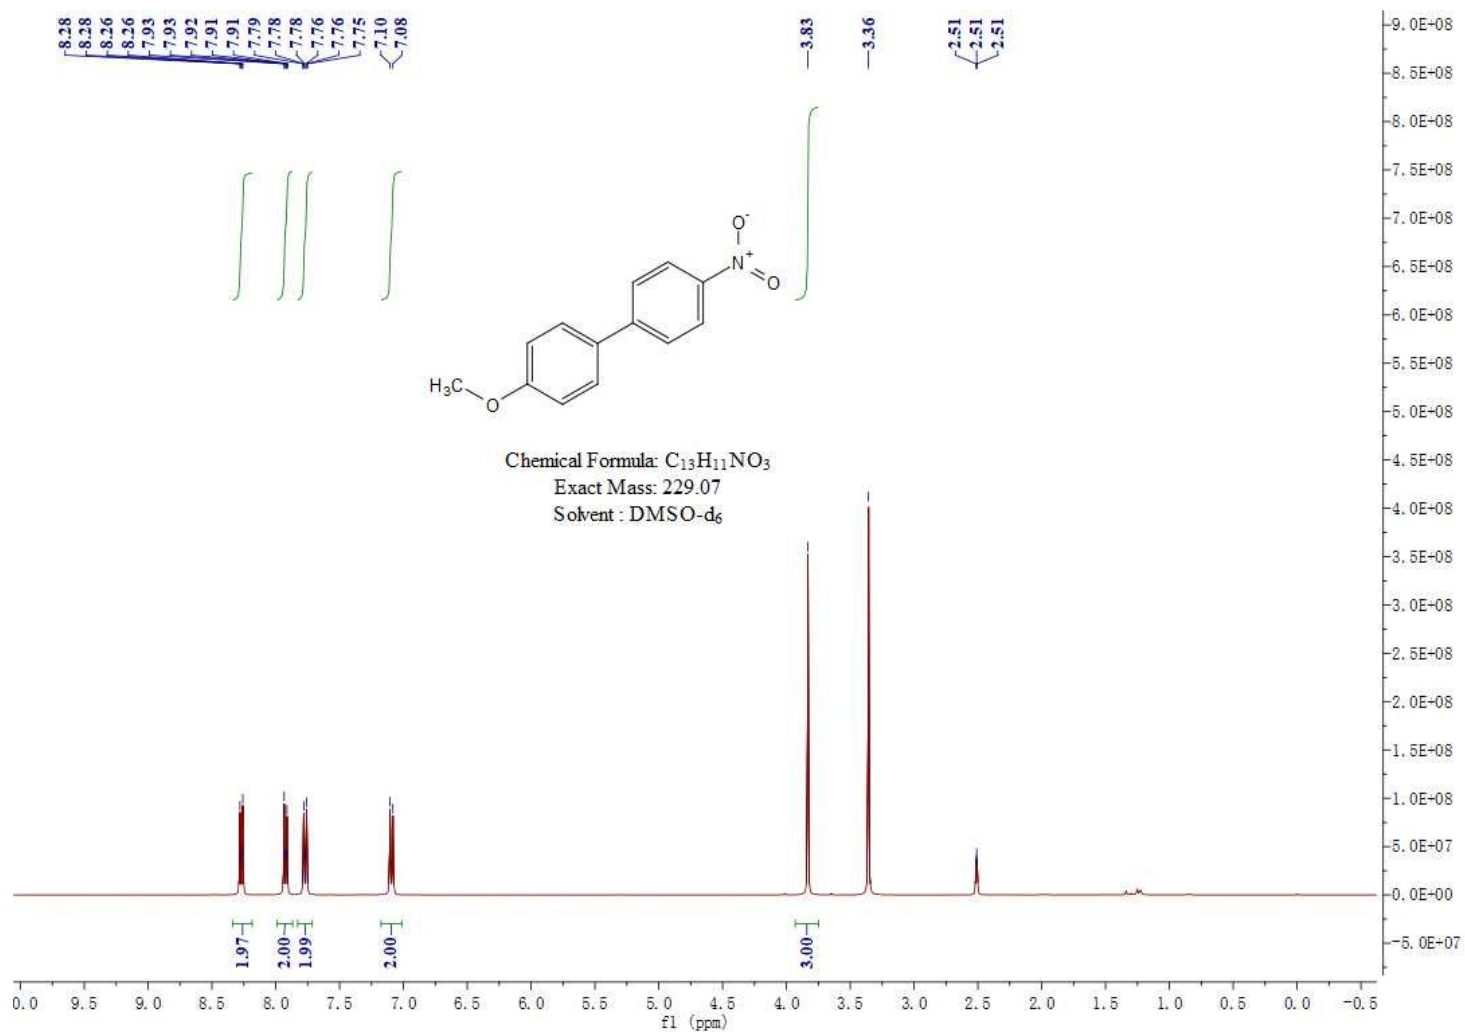

Fig. S48. The <sup>1</sup>H NMR spectrum of B7

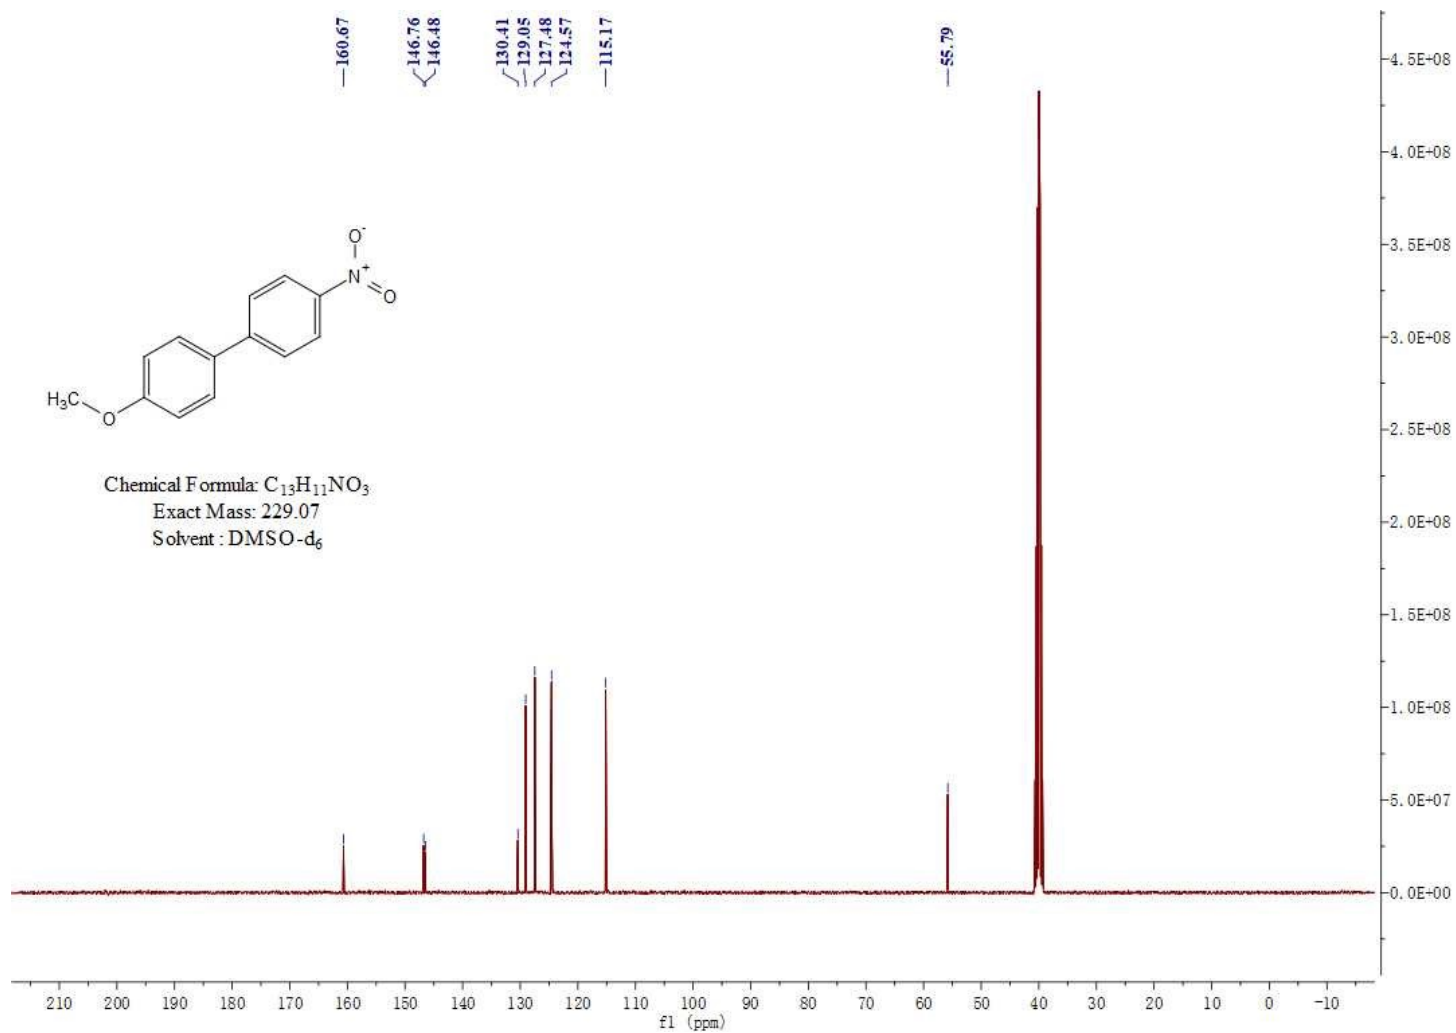

Fig. S49. The  $^{13}C$  NMR spectrum of B7

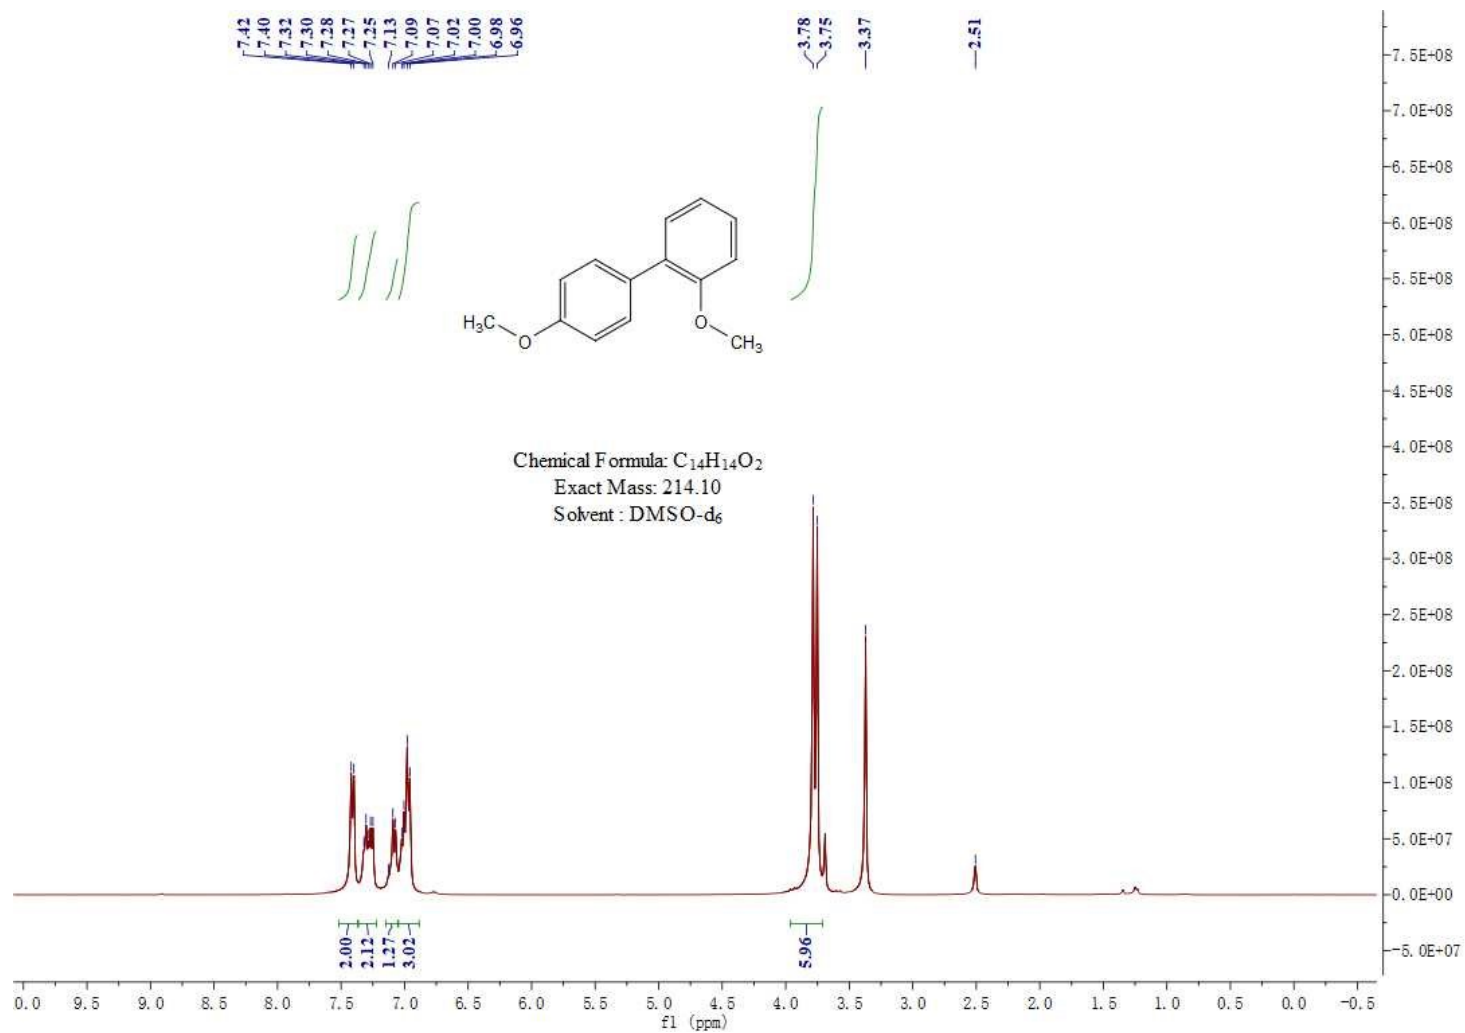

Fig. S50. The <sup>1</sup>H NMR spectrum of B8

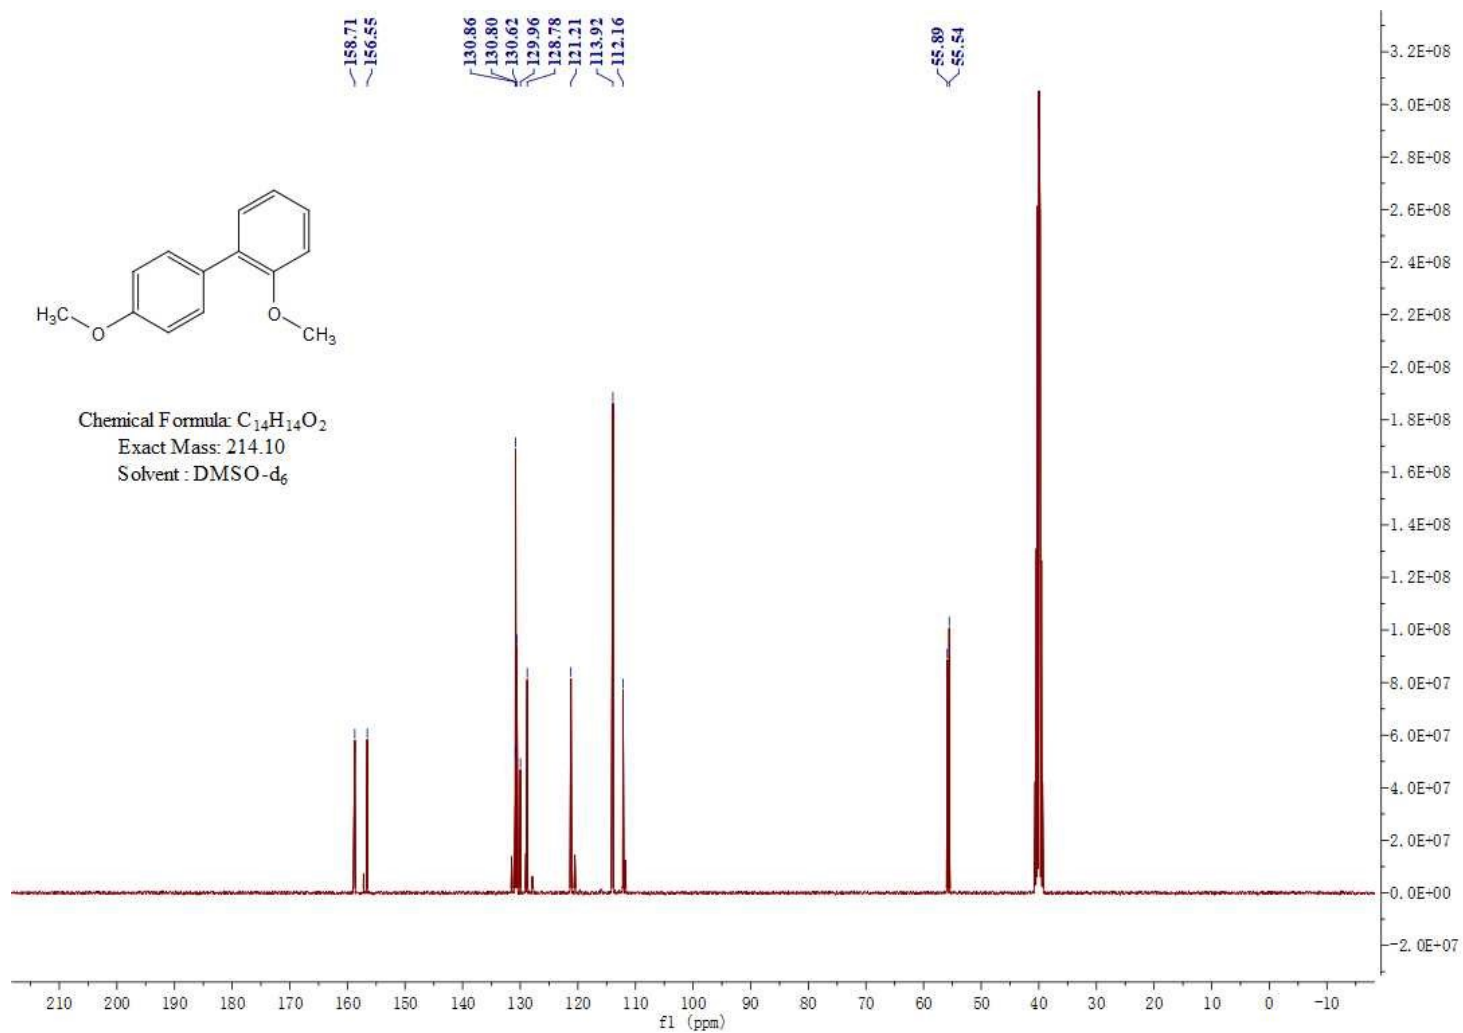

Fig. S51. The  $^{13}C$  NMR spectrum of B8



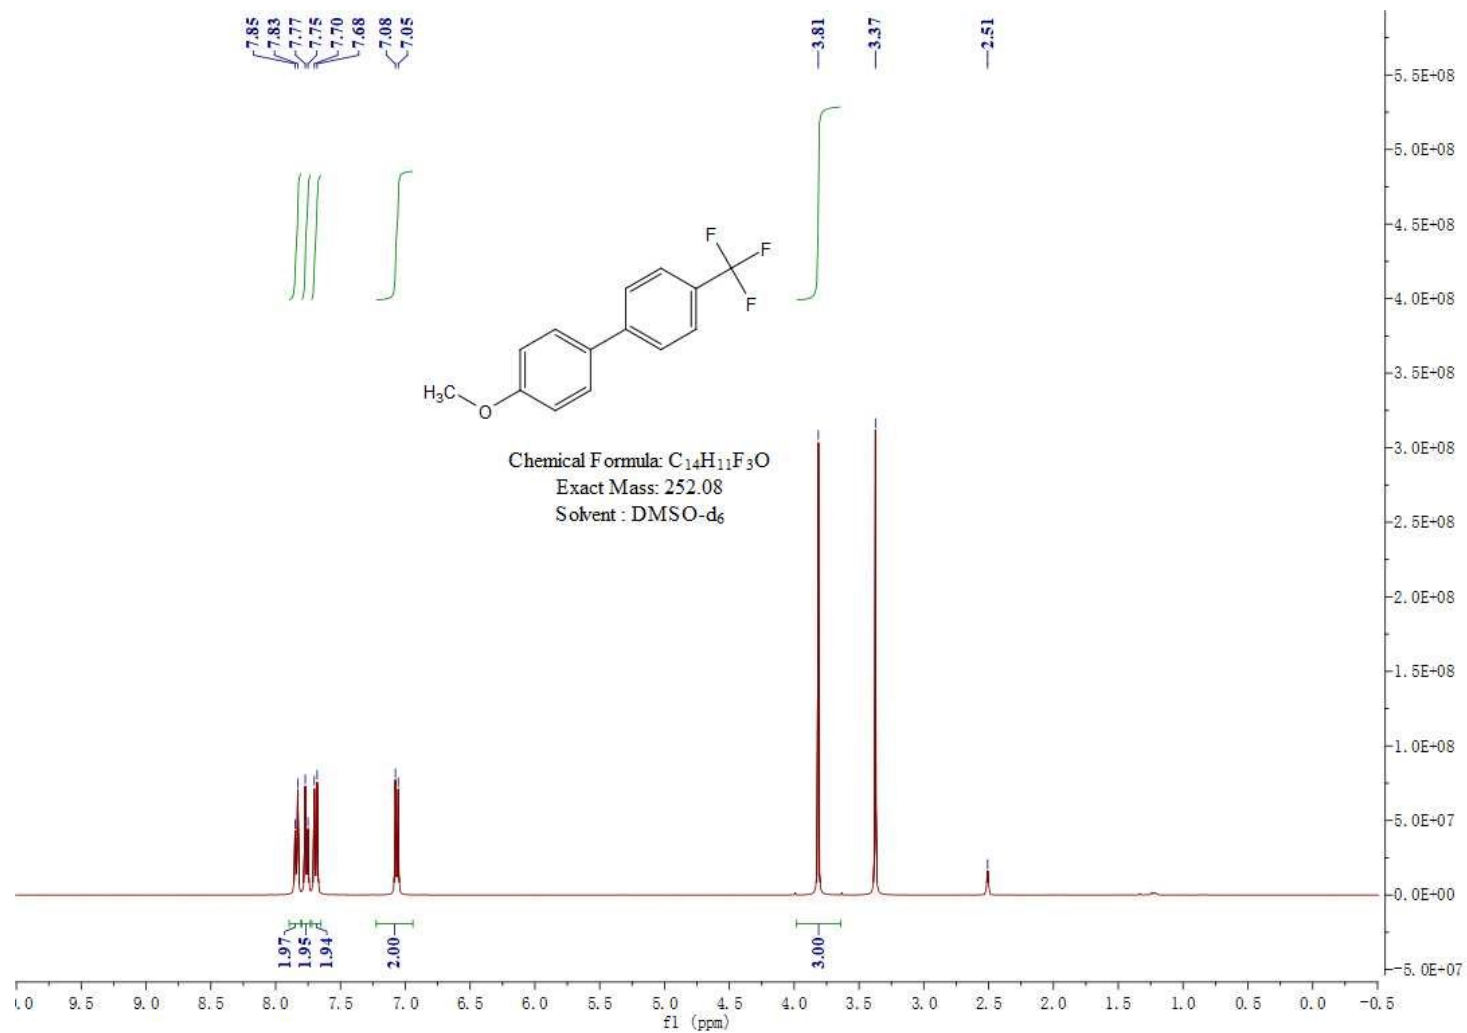

Fig. S52. The <sup>1</sup>H NMR spectrum of B9

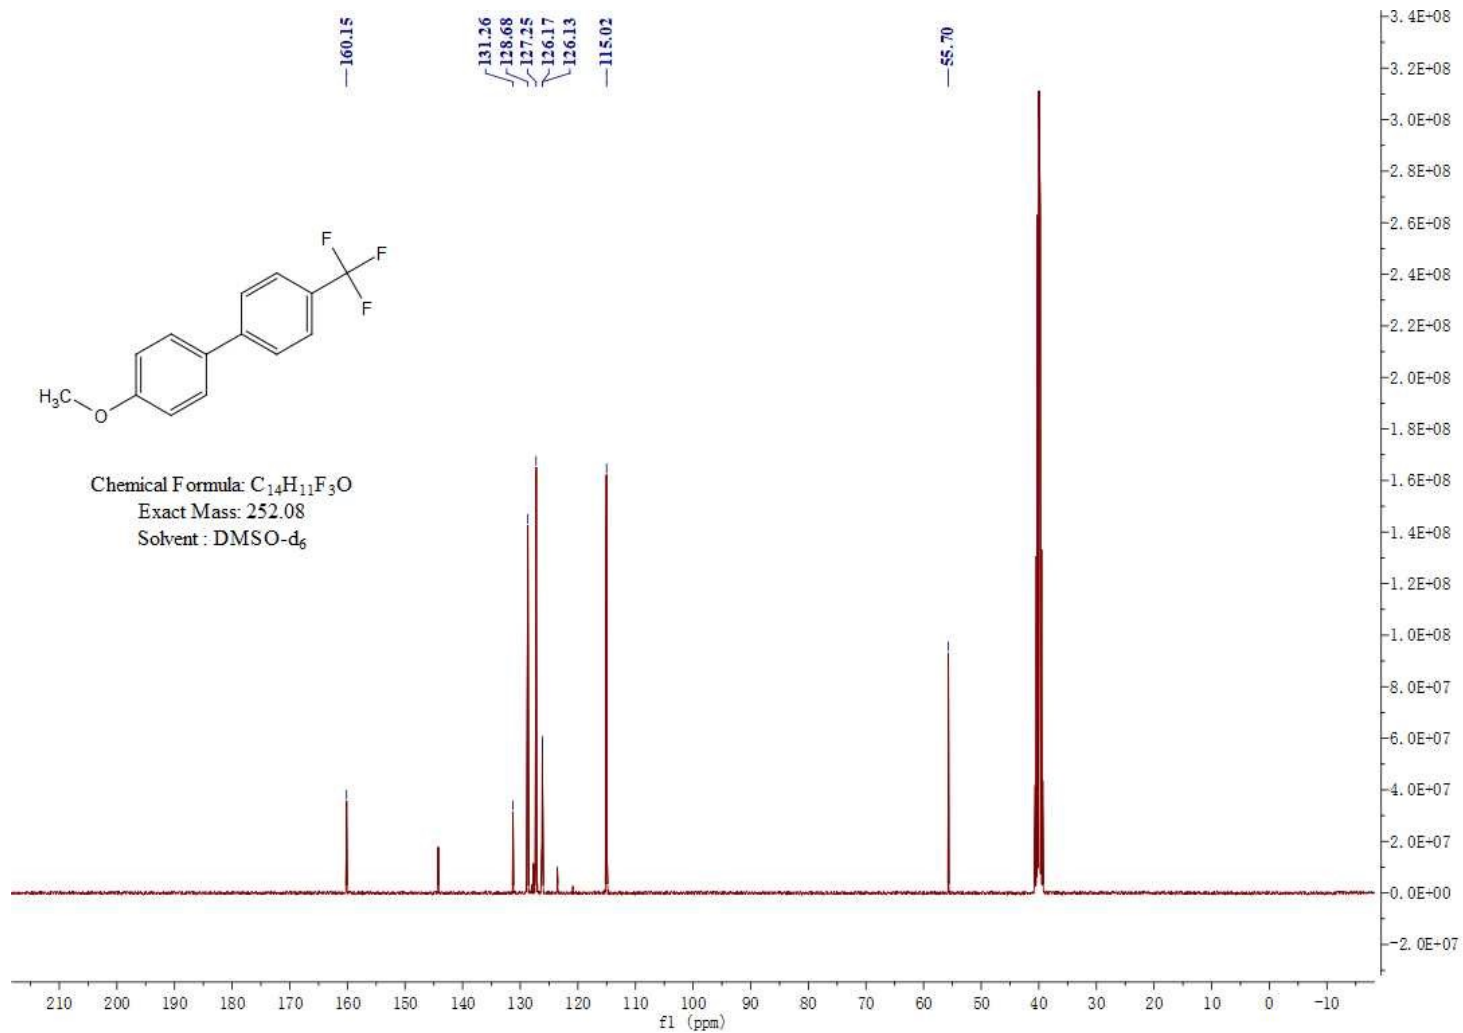

Fig S53. The <sup>13</sup>C NMR spectrum of B9

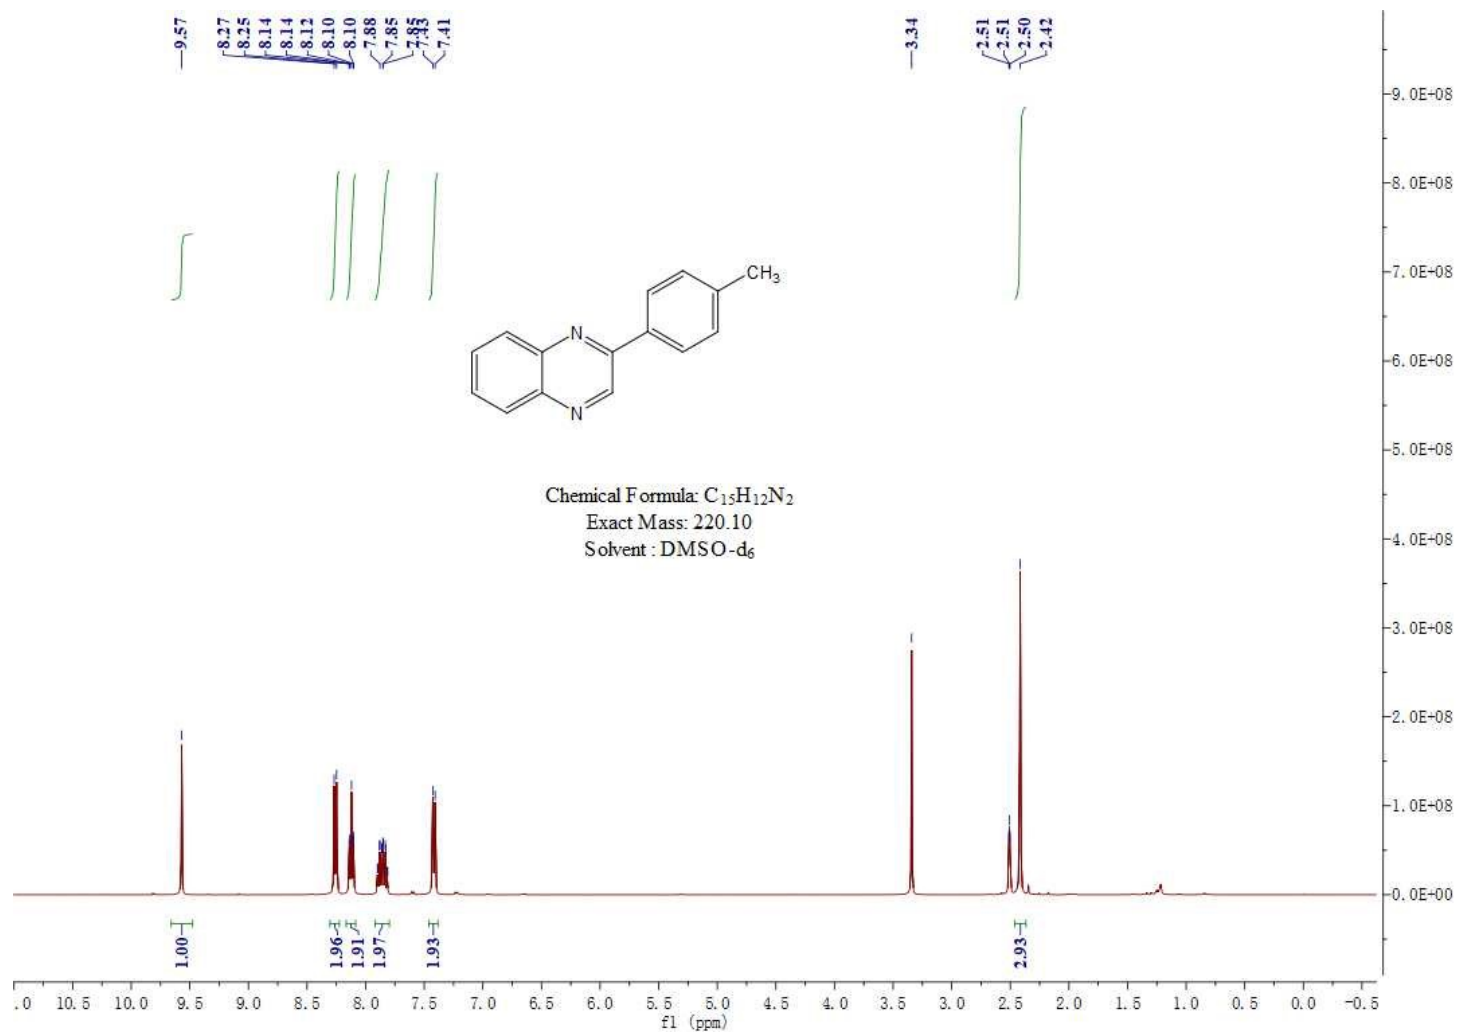

Fig. S54. The <sup>1</sup>H NMR spectrum of A1

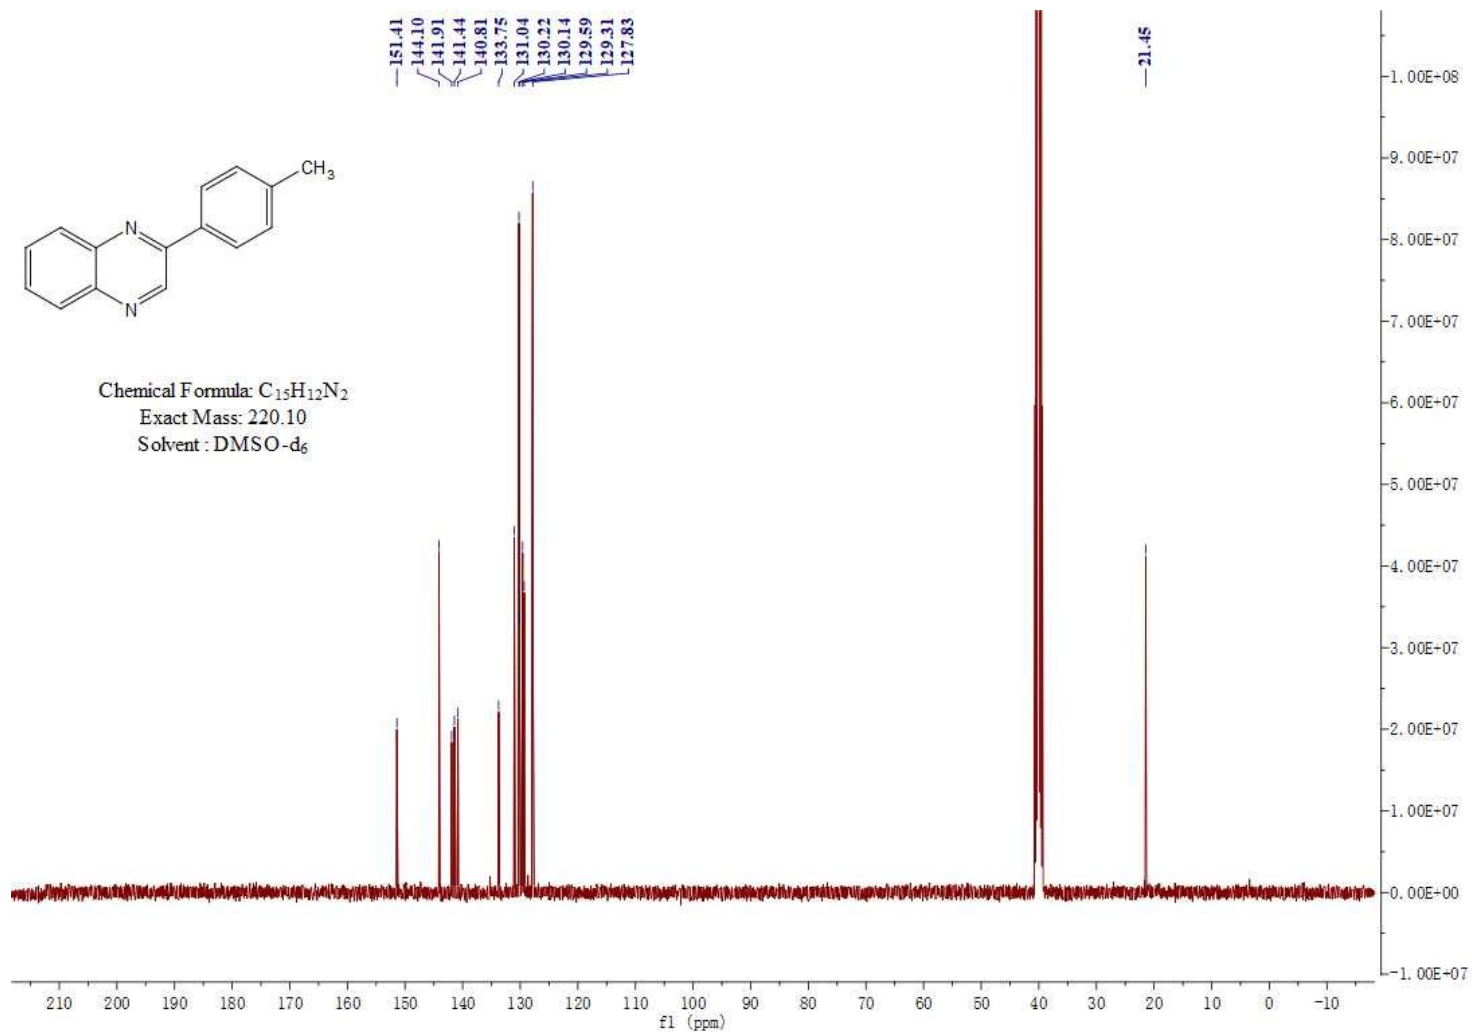

Fig. S55. The <sup>13</sup>C NMR spectrum of A1

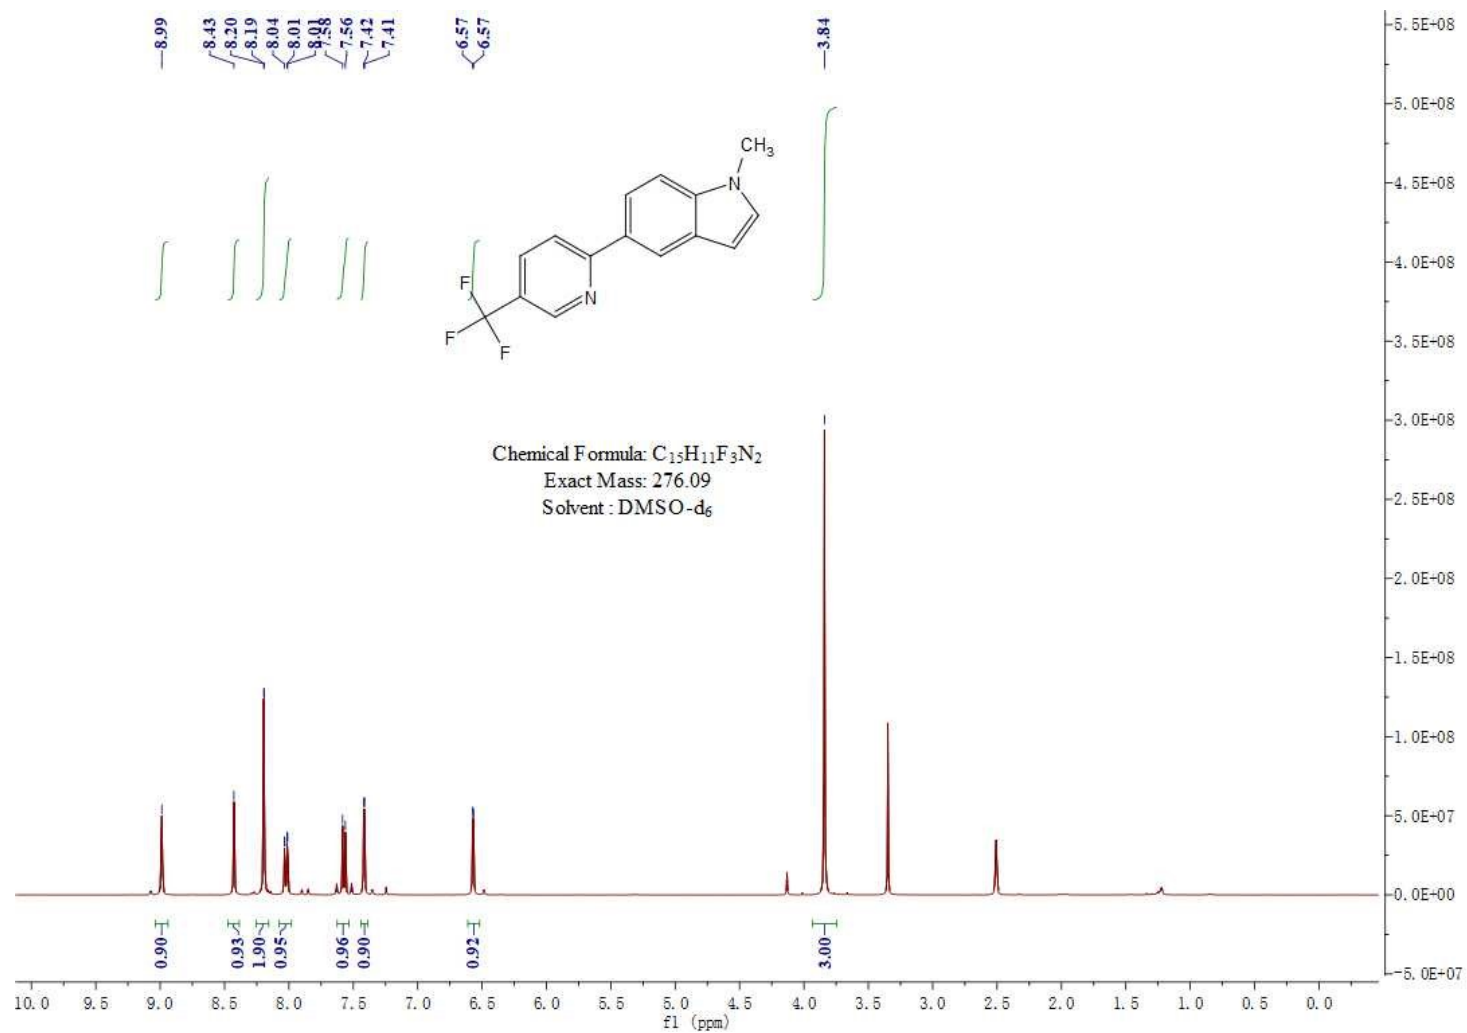

Fig. S56. The  $^1H$  NMR spectrum of A2

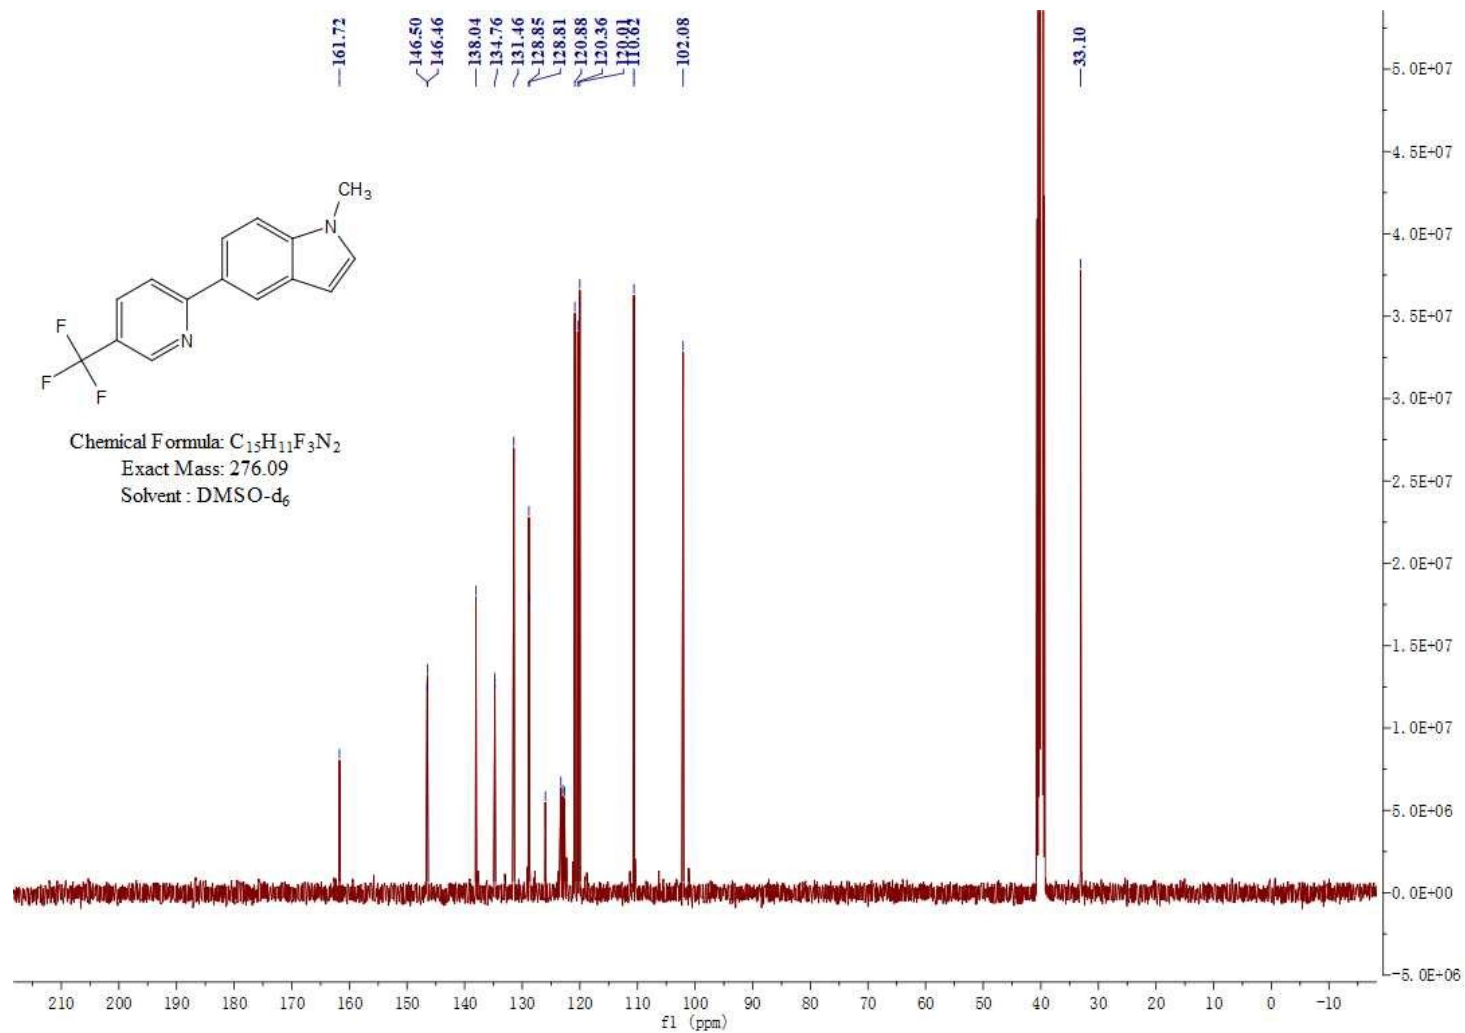

Fig. S57. The  $^{13}C$  NMR spectrum of A2

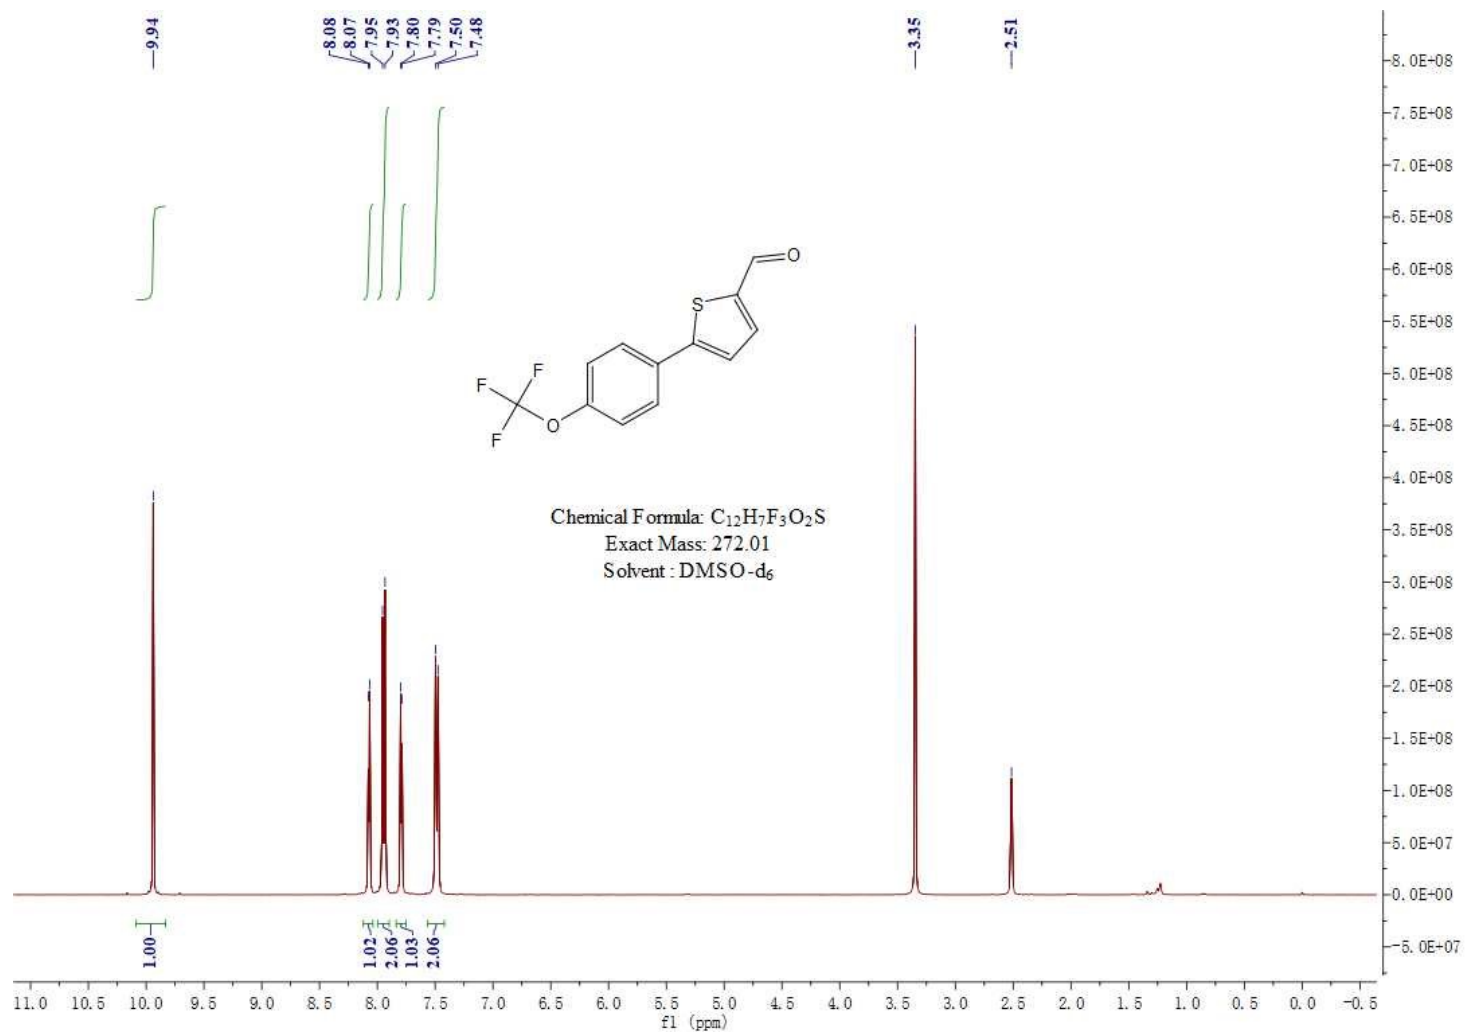

Fig. S58. The  $^1H$  NMR spectrum of A3

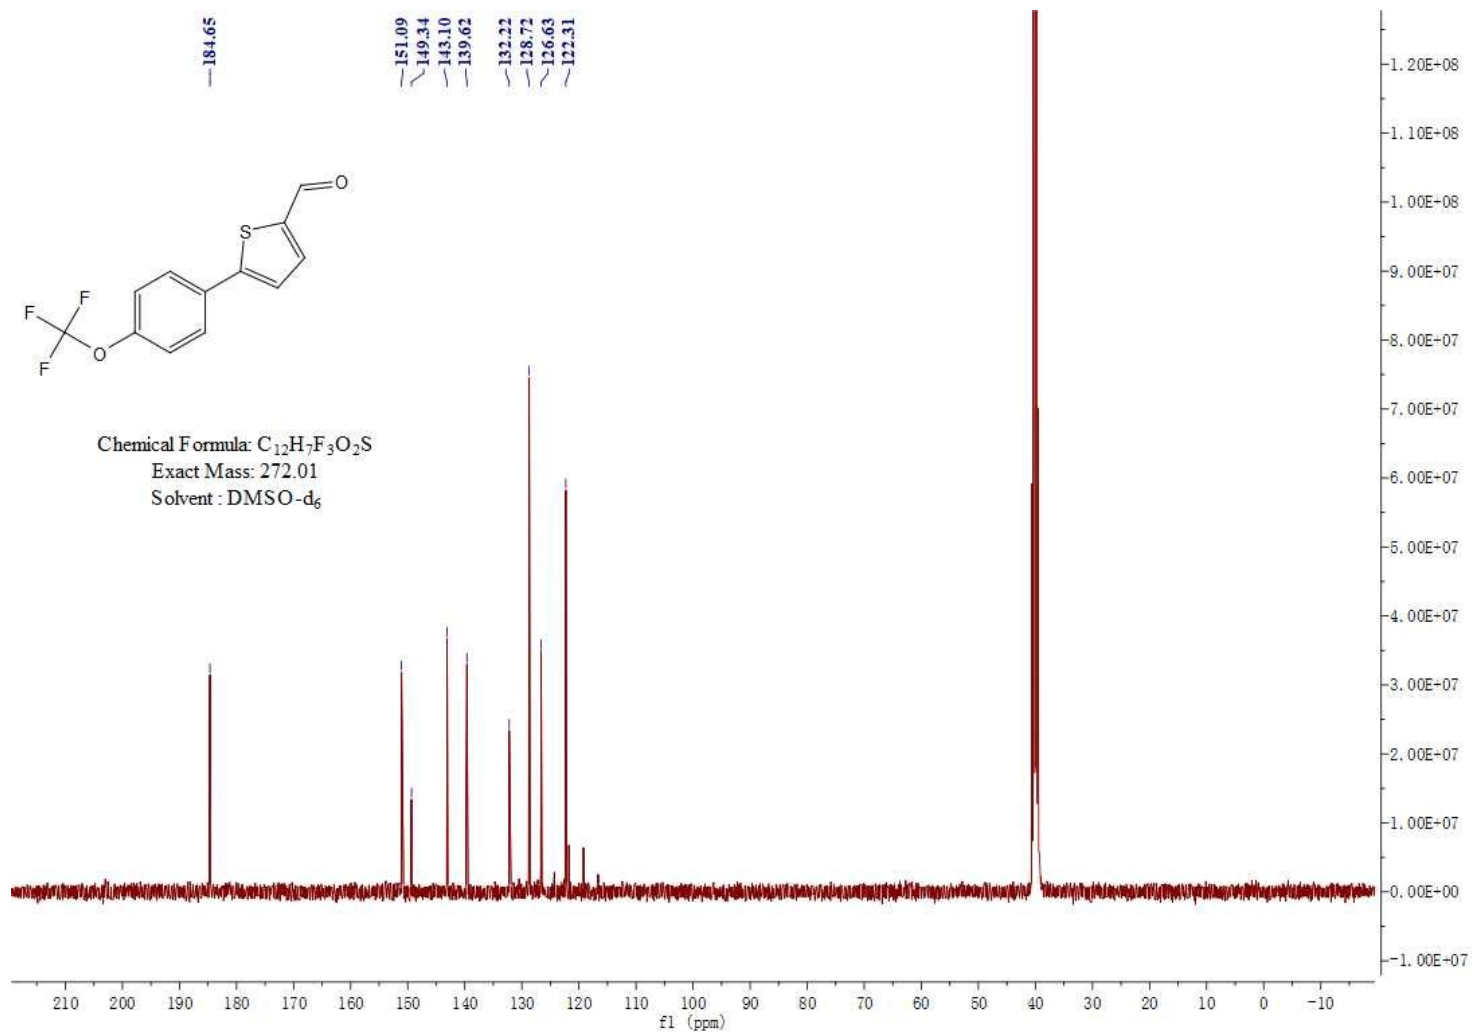

Fig. S59. The <sup>13</sup>C NMR spectrum of A3



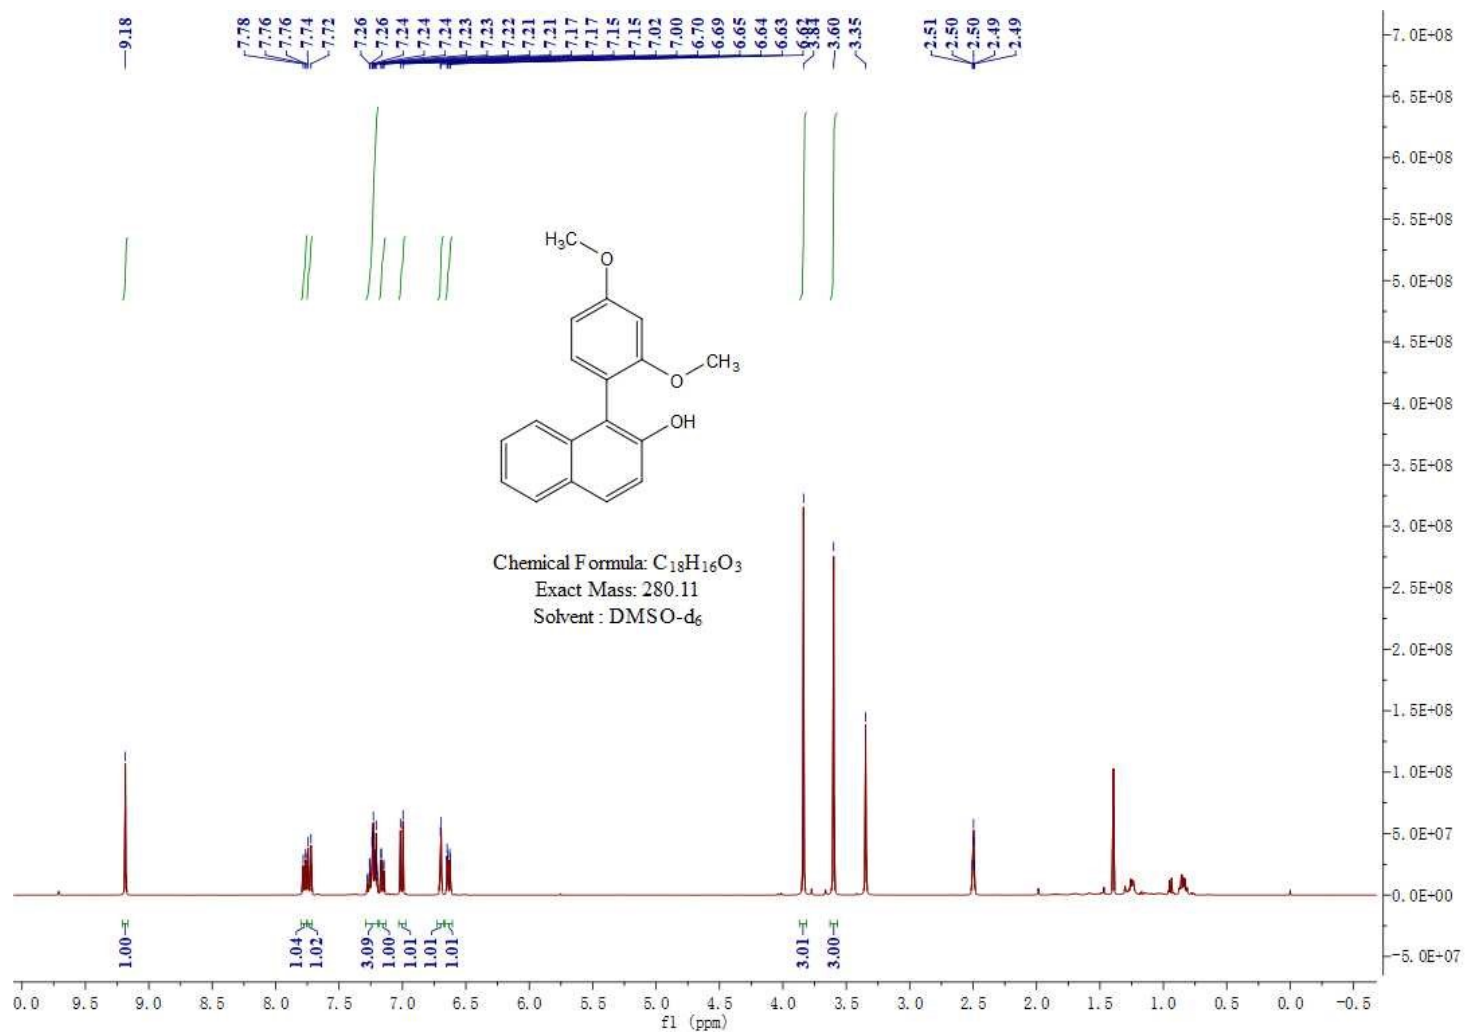

Fig. S60. The <sup>1</sup>H NMR spectrum of A4

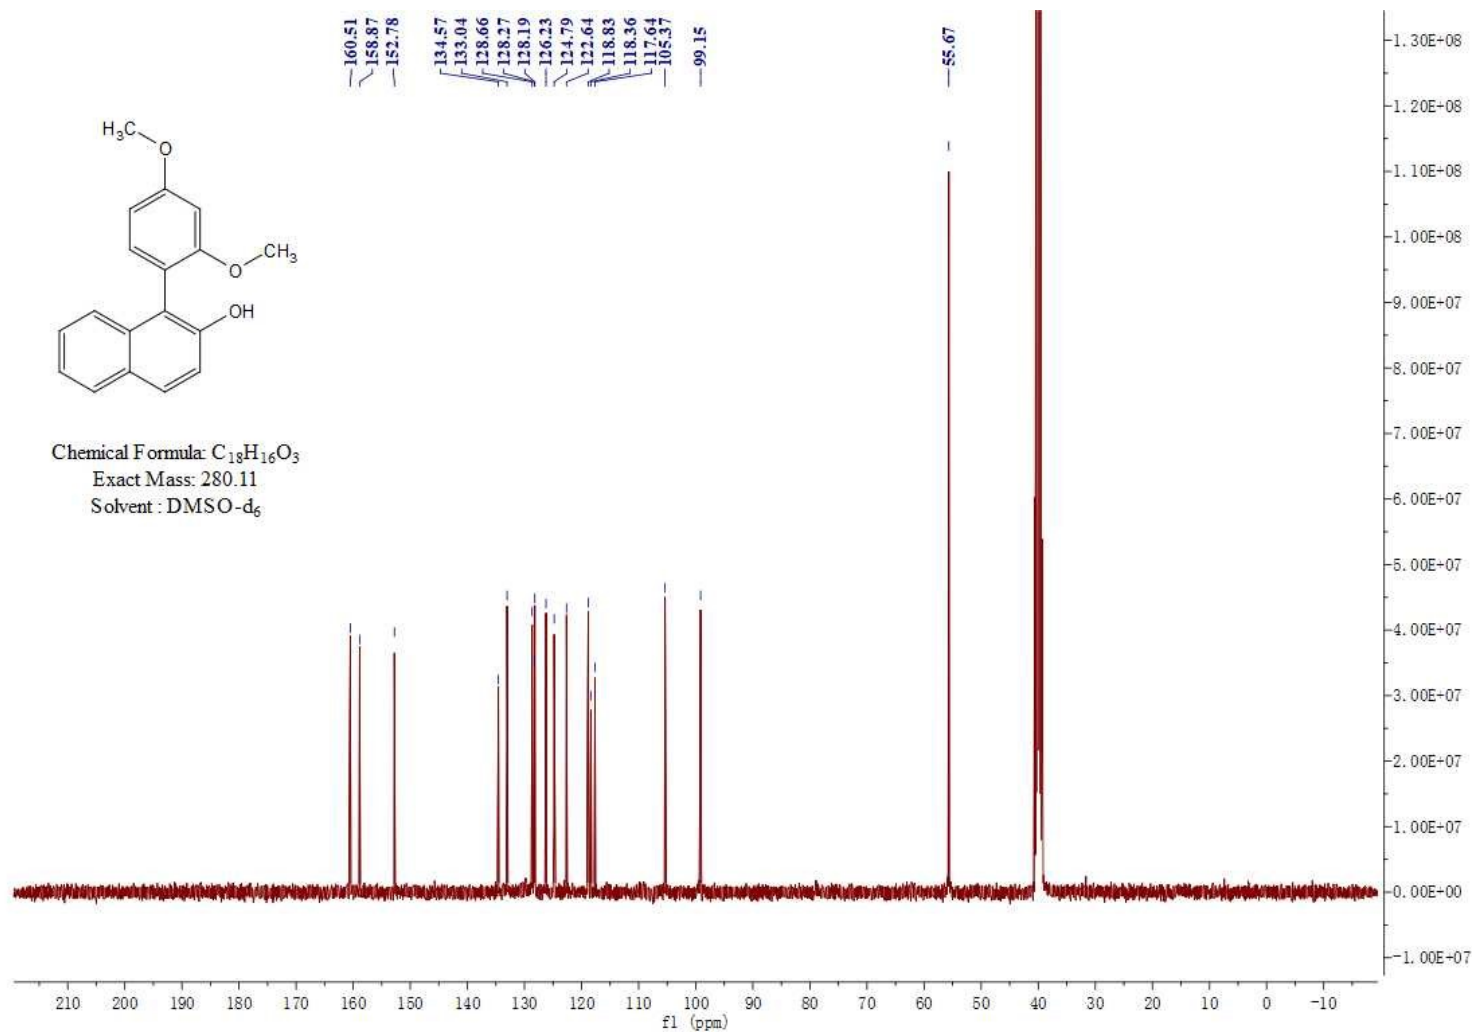

Fig. S61. The  $^{13}C$  NMR spectrum of A4

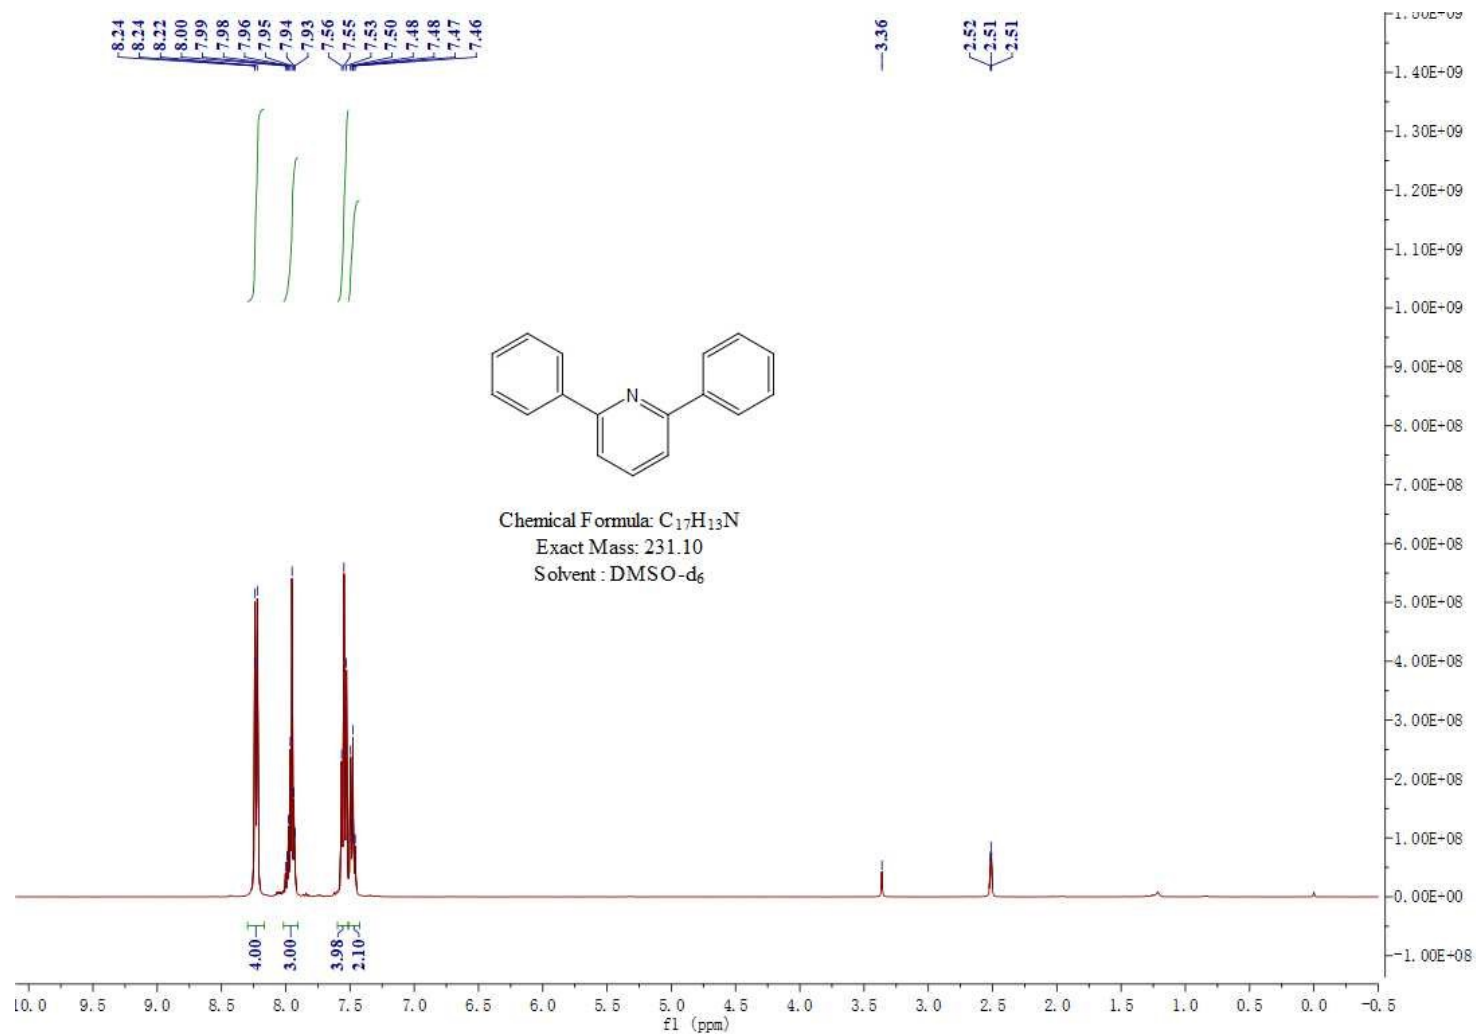

Fig. S62. The <sup>1</sup>H NMR spectrum of M1

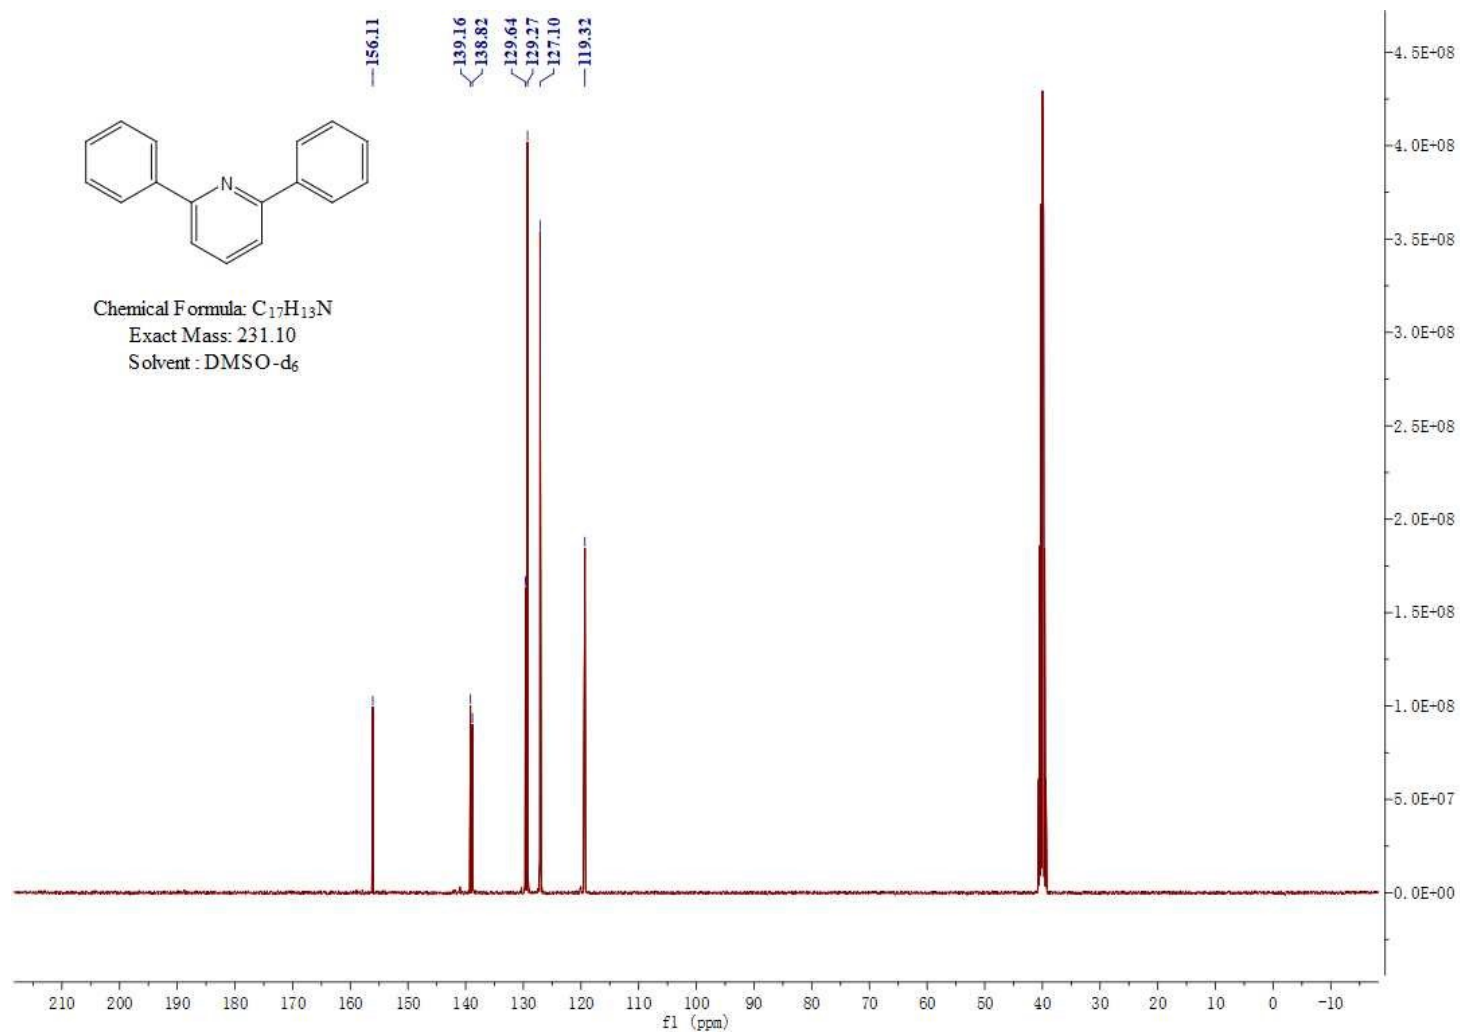

Fig. S63. The <sup>13</sup>C NMR spectrum of M1

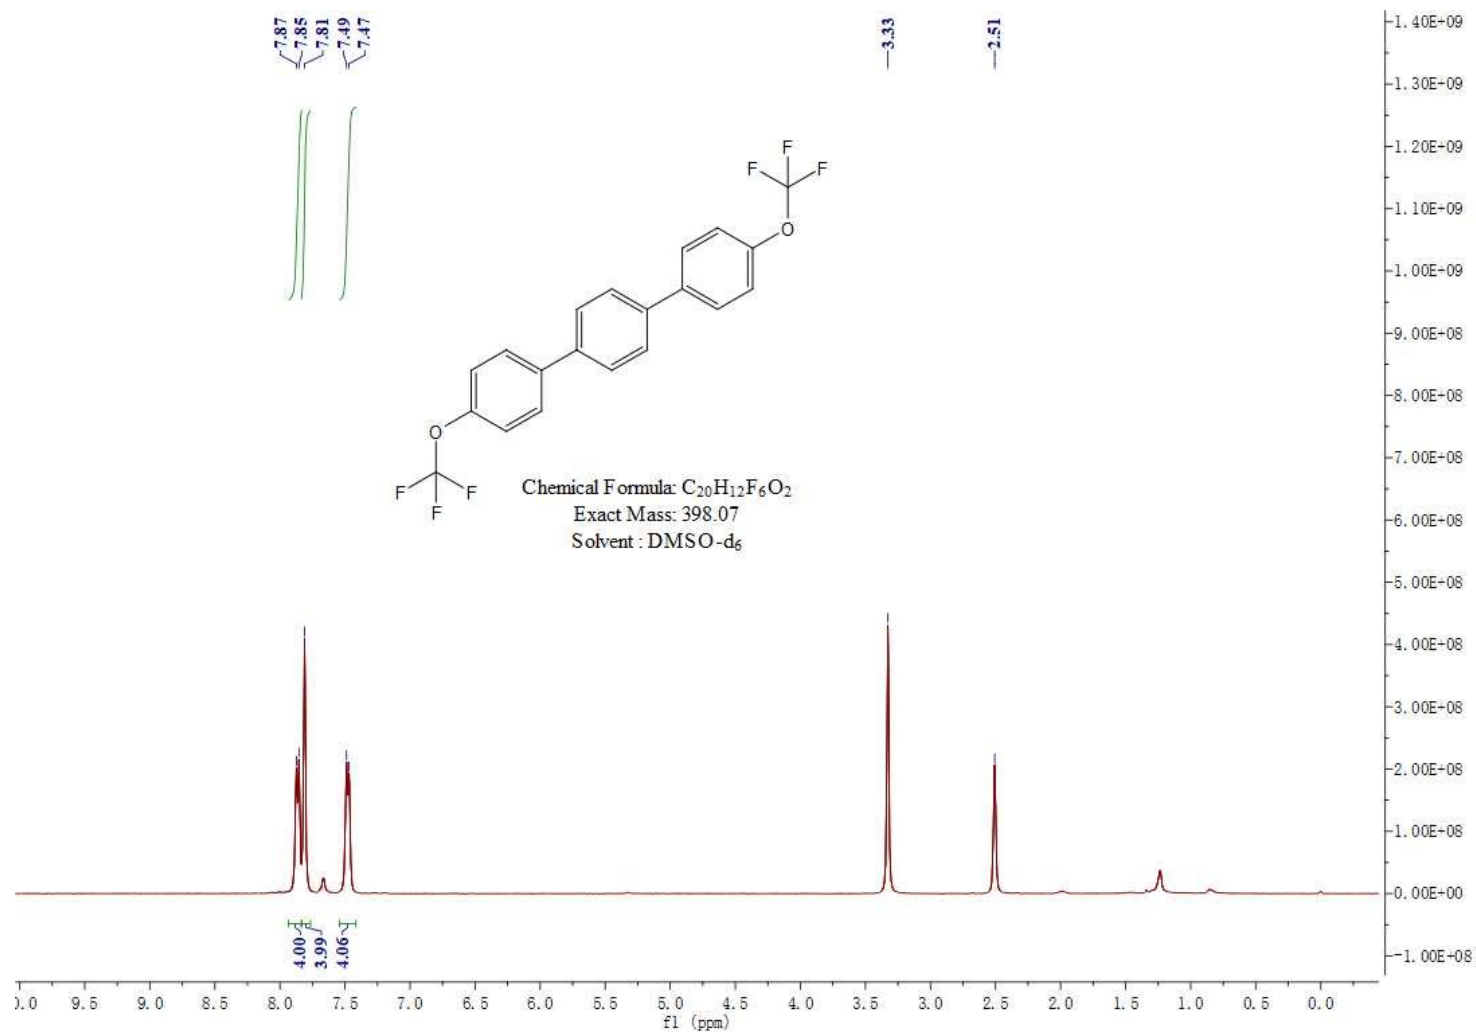

Fig. S64. The  $^1H$  NMR spectrum of M2

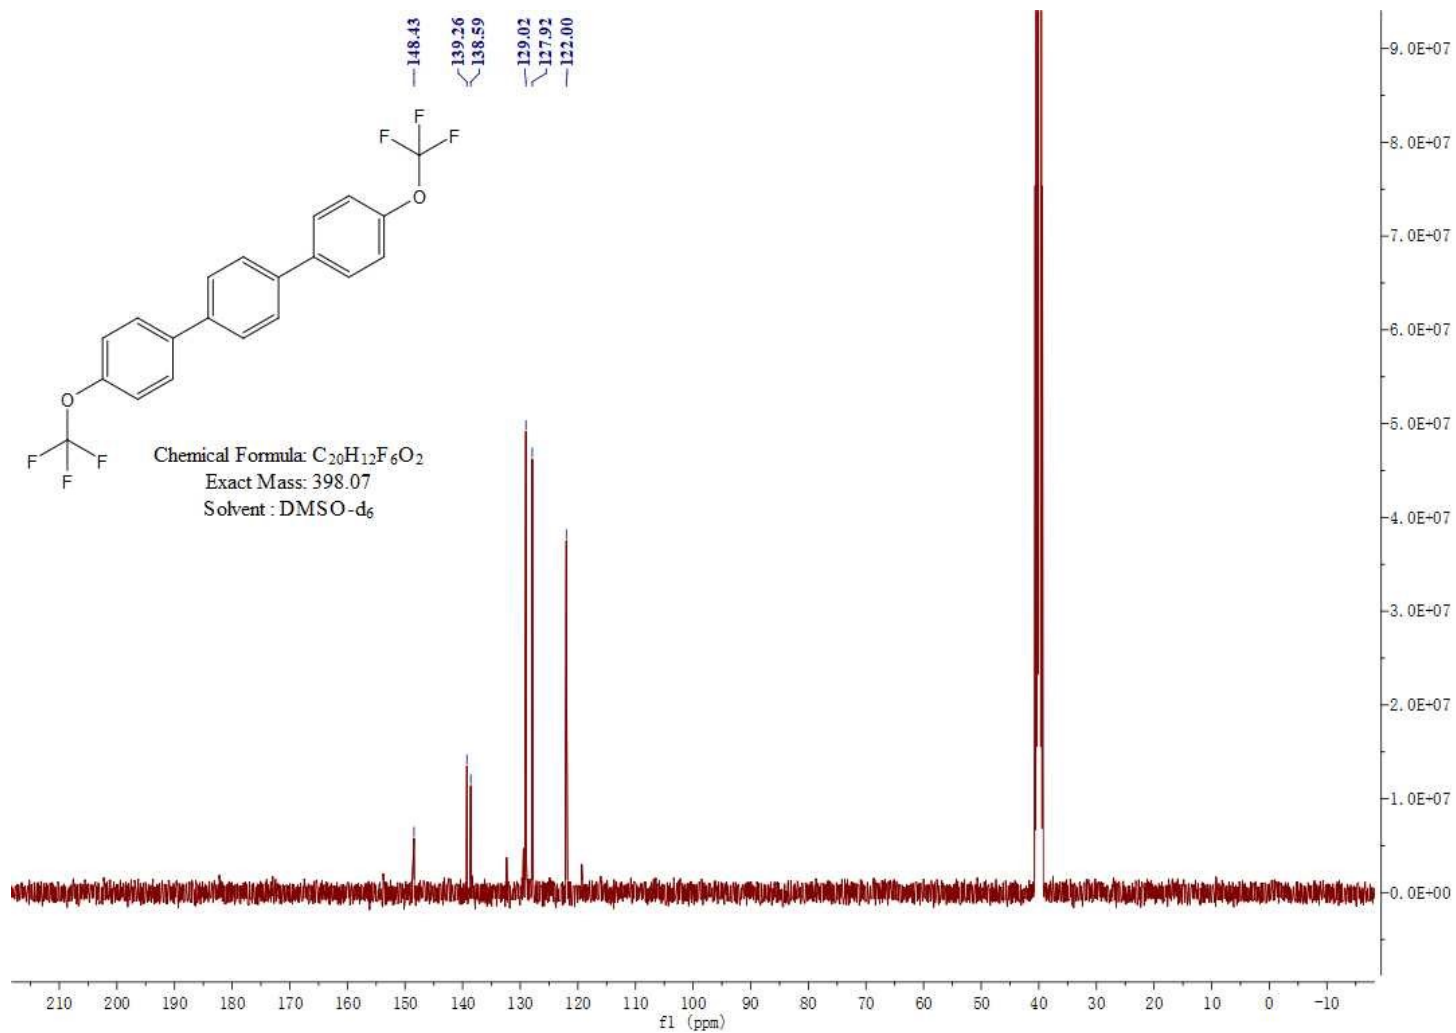

Fig. S65. The <sup>13</sup>C NMR spectrum of M2

#### 14. Spectroscopic data of API intermediates

##### API intermediates 1: 4'-Methyl-2-cyanobiphenyl

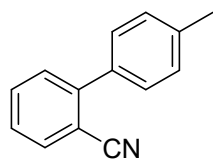

White solid.  $^1\text{H-NMR}$  (400 MHz,  $\text{DMSO-}d_6$ ):  $\delta$  7.94 (dd,  $J = 7.7, 0.7$  Hz, 1H), 7.78 (td,  $J = 7.8, 1.2$  Hz, 1H), 7.57 (ddd,  $J = 9.6, 8.6, 4.4$  Hz, 2H), 7.48 (d,  $J = 8.1$  Hz, 2H), 7.35 (d,  $J = 7.9$  Hz, 2H), 3.35 (s, 2H), 2.39 (s, 3H).  $^{13}\text{C-NMR}$  (100 MHz,  $\text{DMSO-}d_6$ ):  $\delta$  145.02, 138.73, 135.45, 134.28, 133.92, 130.45, 129.77, 129.01, 128.39, 119.12, 110.57, 21.23. MS (HR-ESI)  $m/z$ , calcd. For  $[\text{C}_{14}\text{H}_{11}\text{N} + \text{Na}^+]$  216.0784, found 216.0790.

##### API intermediates 2: Methyl 2-methyl-4'-(trifluoromethoxy)[1,1'-biphenyl]-3-carboxylate

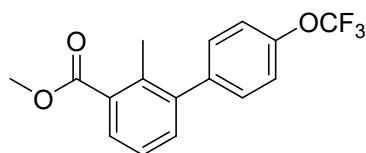

White solid.  $^1\text{H NMR}$  (400 MHz,  $\text{CDCl}_3$ ):  $\delta$  7.83 (dd,  $J = 7.5, 1.3$  Hz, 1H), 7.36 - 7.30 (m, 2H), 7.27 (dd,  $J = 7.4, 2.5$  Hz, 3H), 3.92 (s, 3H), 2.40 (s, 3H).  $^{13}\text{C NMR}$  (100 MHz,  $\text{DMSO-}d_6$ )  $\delta$  168.49, 148.07, 142.17, 140.50, 136.15, 135.69, 133.49, 132.05, 131.66, 129.51, 126.31, 121.33, 52.61, 18.45. MS (HR-ESI)  $m/z$ , calcd. For  $[\text{C}_{16}\text{H}_{13}\text{F}_3\text{O}_3 + \text{H}^+]$  311.0890, found 311.0894.

##### API intermediates 3: 7-Bromo-2-(1-methyl-1H-pyrazol-4-yl)quinoxaline

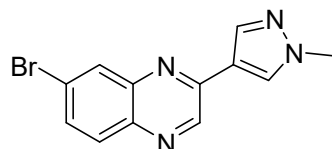

White solid.  $^1\text{H-NMR}$  (400 MHz,  $\text{DMSO-}d_6$ ):  $\delta$  9.32 (s, 1H), 8.63 (s, 1H), 8.29 (s, 1H), 8.17 (d,  $J = 2.1$  Hz, 1H), 7.97 (d,  $J = 8.8$  Hz, 1H), 7.86 (dd,  $J = 8.8, 2.2$  Hz, 1H), 3.97 (s, 3H).  $^{13}\text{C-NMR}$  (101 MHz,  $\text{DMSO-}d_6$ ):  $\delta$  148.44 (s), 144.91 (s), 142.89 (s), 139.64 (s), 138.73 (s), 132.17 (s), 131.86 (s), 131.23 (s), 130.75 (s), 123.79 (s), 120.18 (s), 25.42 (s), 25.07 (s). MS (HR-ESI)  $m/z$ , calcd. For  $[\text{C}_{12}\text{H}_9\text{BrN}_4 + \text{H}^+]$  289.0083, found 289.0087.

##### API intermediates 4: 1-chloro-7-(1-methyl-1H-indol-5-yl)-isoquinoline

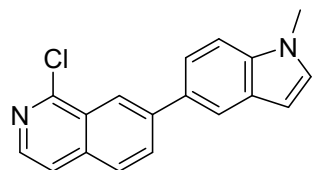

White solid.  $^1\text{H-NMR}$  (400 MHz,  $\text{DMSO-}d_6$ ):  $\delta$  8.43 (s, 1H), 8.33 - 8.23 (m, 2H), 8.15 (d,  $J = 8.6$  Hz, 1H), 8.04 (d,  $J = 1.0$  Hz, 1H), 7.92 (d,  $J = 5.5$  Hz, 1H), 7.63 (dt,  $J = 16.8, 5.1$  Hz, 2H), 7.42 (d,

$J = 3.0$  Hz, 1H), 6.57 (d,  $J = 2.8$  Hz, 1H), 3.86 (s, 3H).  $^{13}\text{C}$ -NMR (100 MHz,  $\text{DMSO-}d_6$ ):  $\delta$  150.57, 142.94, 141.47, 136.93, 136.56, 131.76, 131.28, 130.43, 129.25, 128.50, 127.05, 122.17, 121.60, 121.10, 119.78, 111.00, 101.61, 33.10. MS (HR-ESI)  $m/z$ , calcd. For  $[\text{C}_{18}\text{H}_{13}\text{ClN}_2 + \text{H}^+]$  293.0840, found 293.0874.

**API intermediates 5: *tert*-Butyl 3-(3-methylpyridin-2-yl)benzoate**

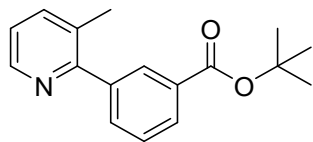

White solid.  $^1\text{H}$ -NMR (400 MHz,  $\text{DMSO-}d_6$ ):  $\delta$  8.52 (dd,  $J = 4.6, 1.1$  Hz, 1H), 8.05 (t,  $J = 1.6$  Hz, 1H), 7.99 - 7.93 (m, 1H), 7.82 (dd,  $J = 6.5, 1.2$  Hz, 1H), 7.76 (d,  $J = 7.7$  Hz, 1H), 7.60 (t,  $J = 7.7$  Hz, 1H), 7.34 (dd,  $J = 7.7, 4.7$  Hz, 1H), 2.33 (s, 3H), 1.56 (s, 9H).  $^{13}\text{C}$ -NMR (100 MHz,  $\text{DMSO-}d_6$ ):  $\delta$  165.26, 157.13, 147.48, 141.02, 139.29, 133.72, 131.75, 131.09, 129.98, 128.90, 128.79, 123.19, 81.36, 28.23, 20.06. MS (HR-ESI)  $m/z$ , calcd. For  $[\text{C}_{17}\text{H}_{19}\text{NO}_2 + \text{H}^+]$  270.1489, found 270.1495.



15. <sup>1</sup>H NMR, <sup>13</sup>C NMR and HRMS spectra of API intermediates

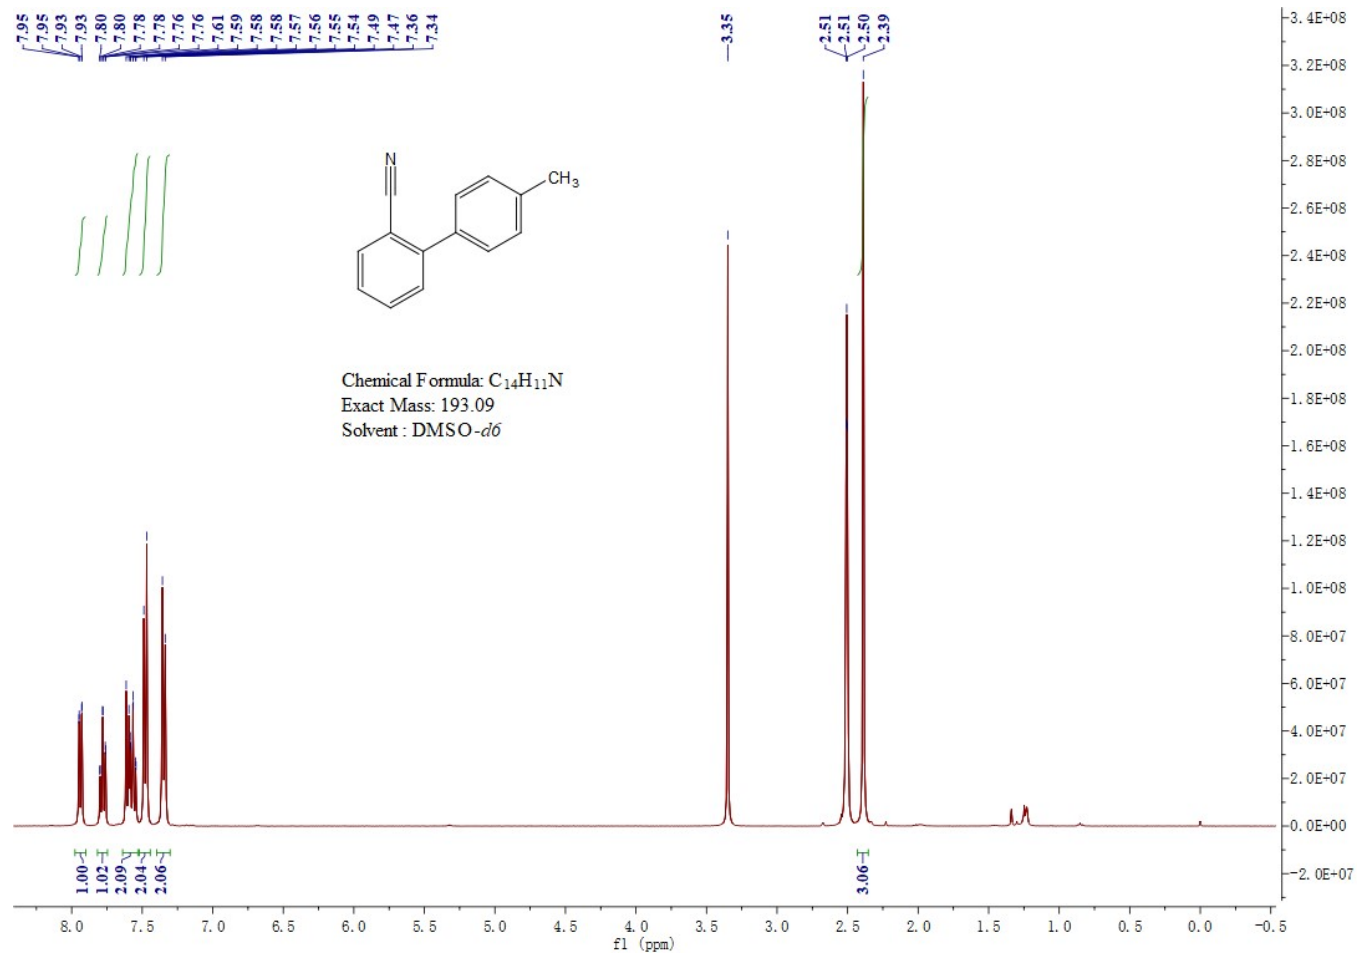

Fig. S66. The <sup>1</sup>H NMR spectrum of intermediate 1

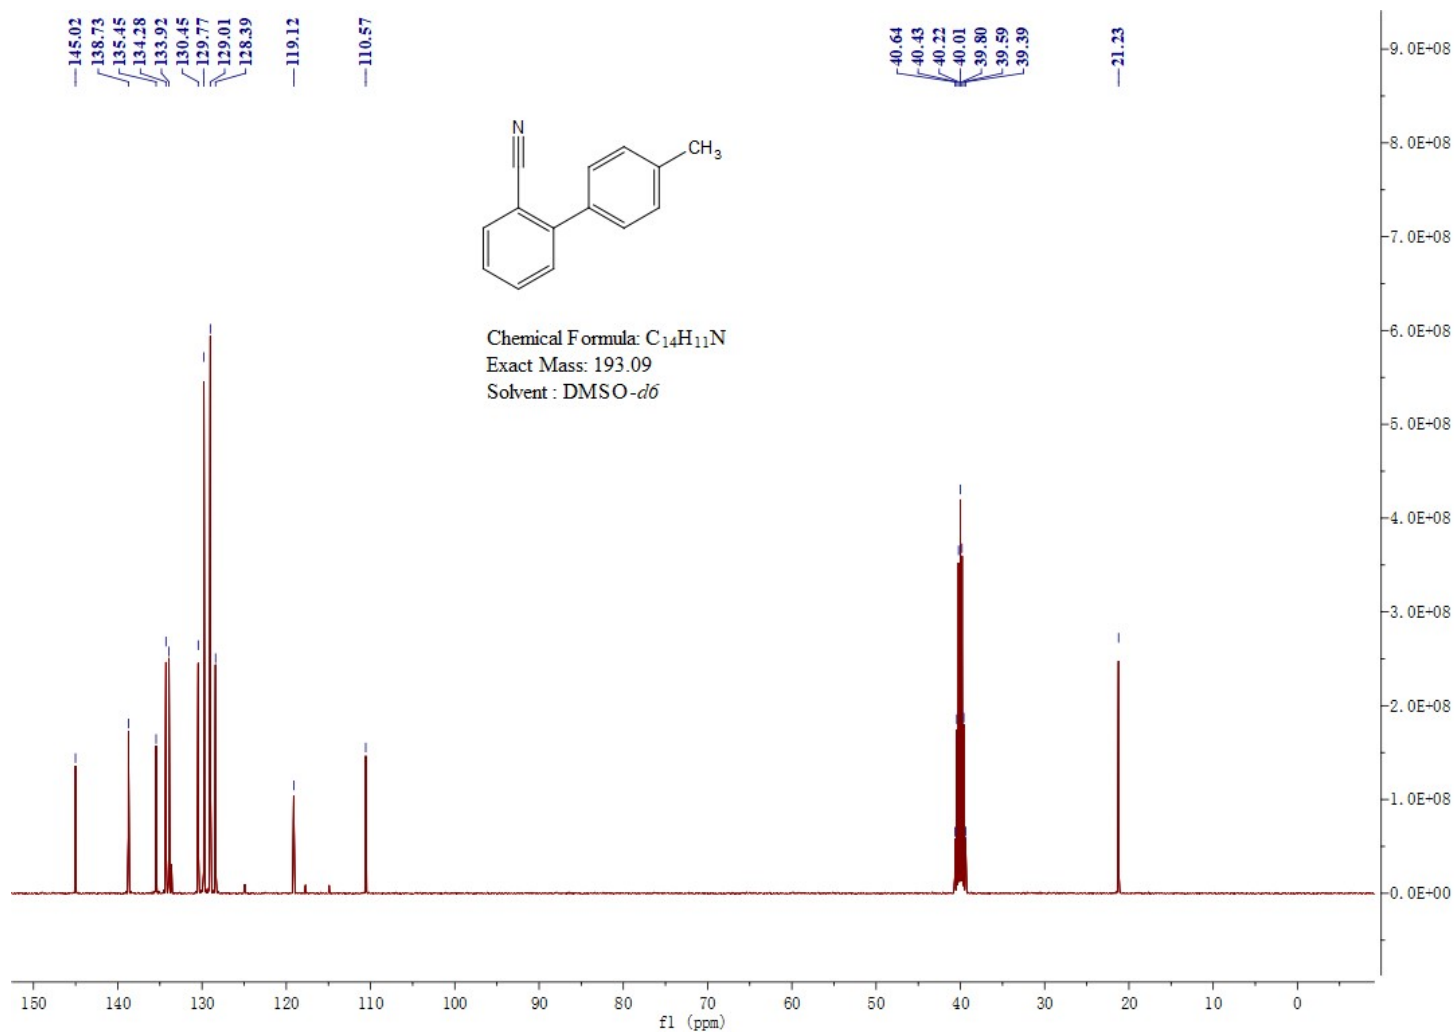

Fig. S67. The <sup>13</sup>C NMR spectrum of intermediate 1

Y30181244-I2

XEVO-G2TOF#NotSet

11-Mar-2021 10:30:00

20210684 188 (1.846) Cm (188-(659:660+665:668))

1: TOF MS ES+  
1.61e5

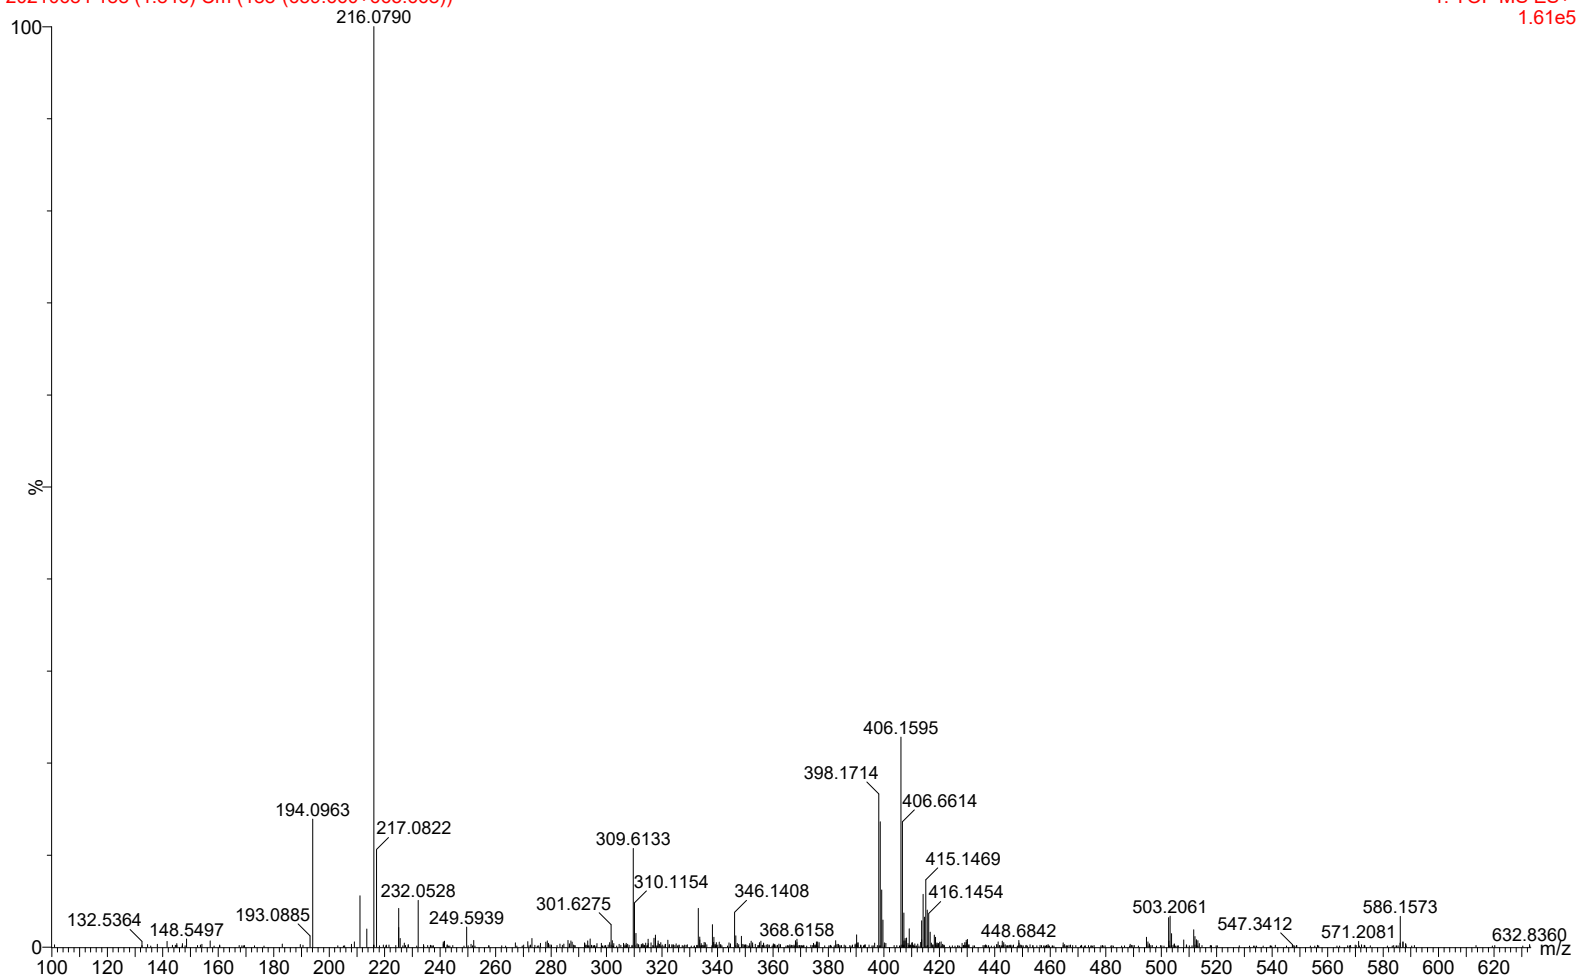

Fig. S68. The HRMS spectrum of intermediate 1

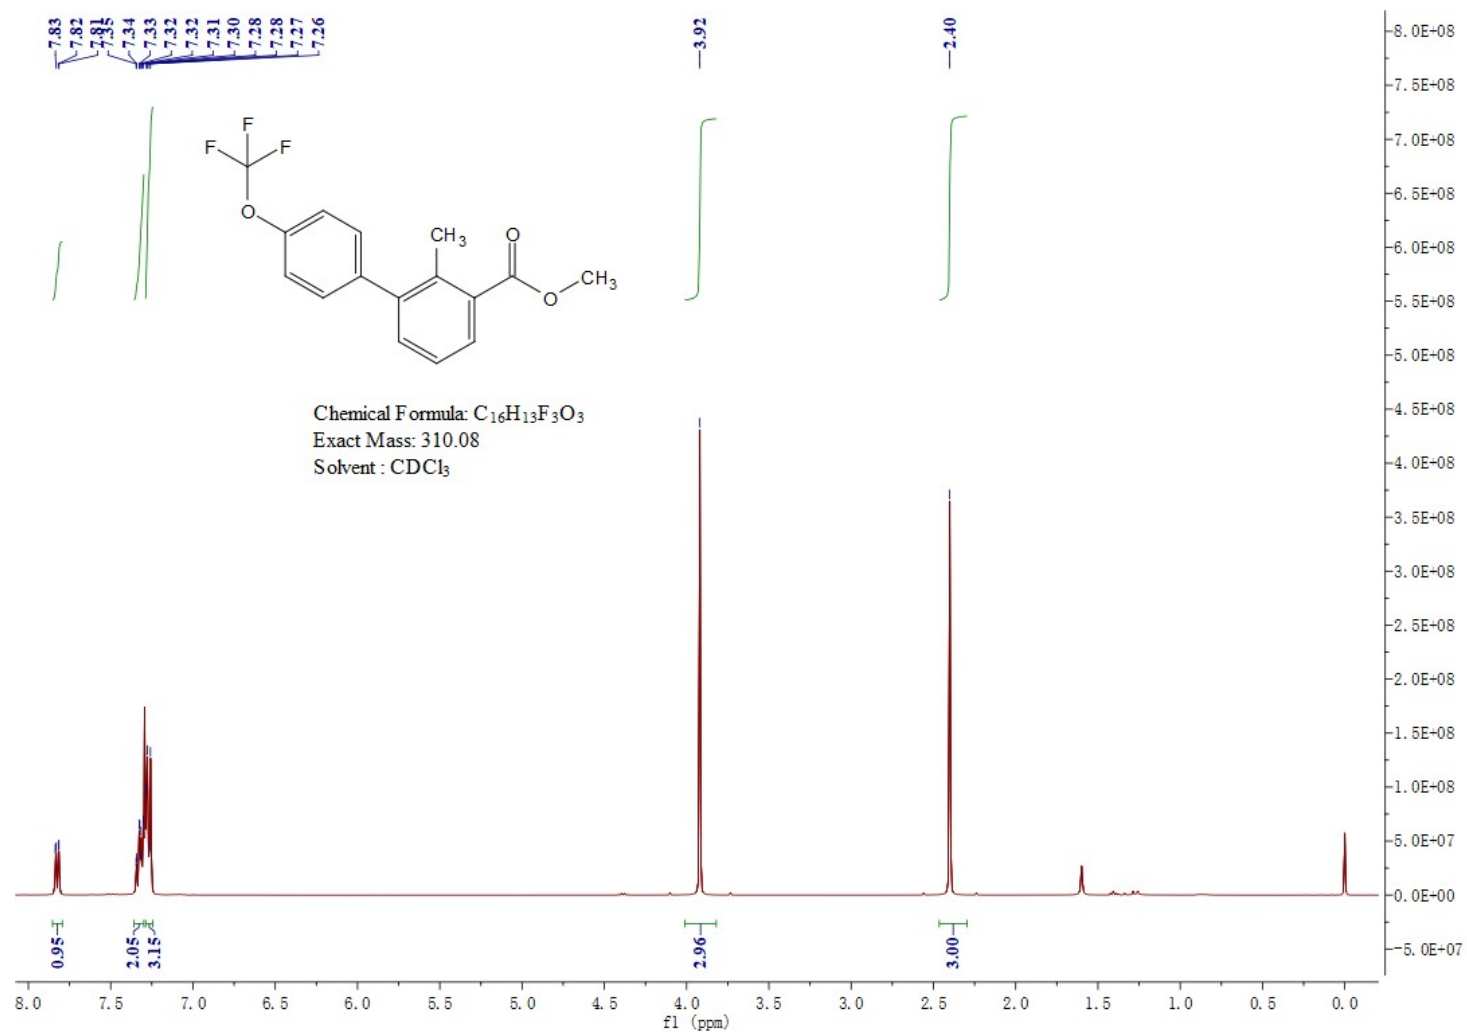

Fig. S69. The  $^1H$  NMR spectrum of intermediate 2

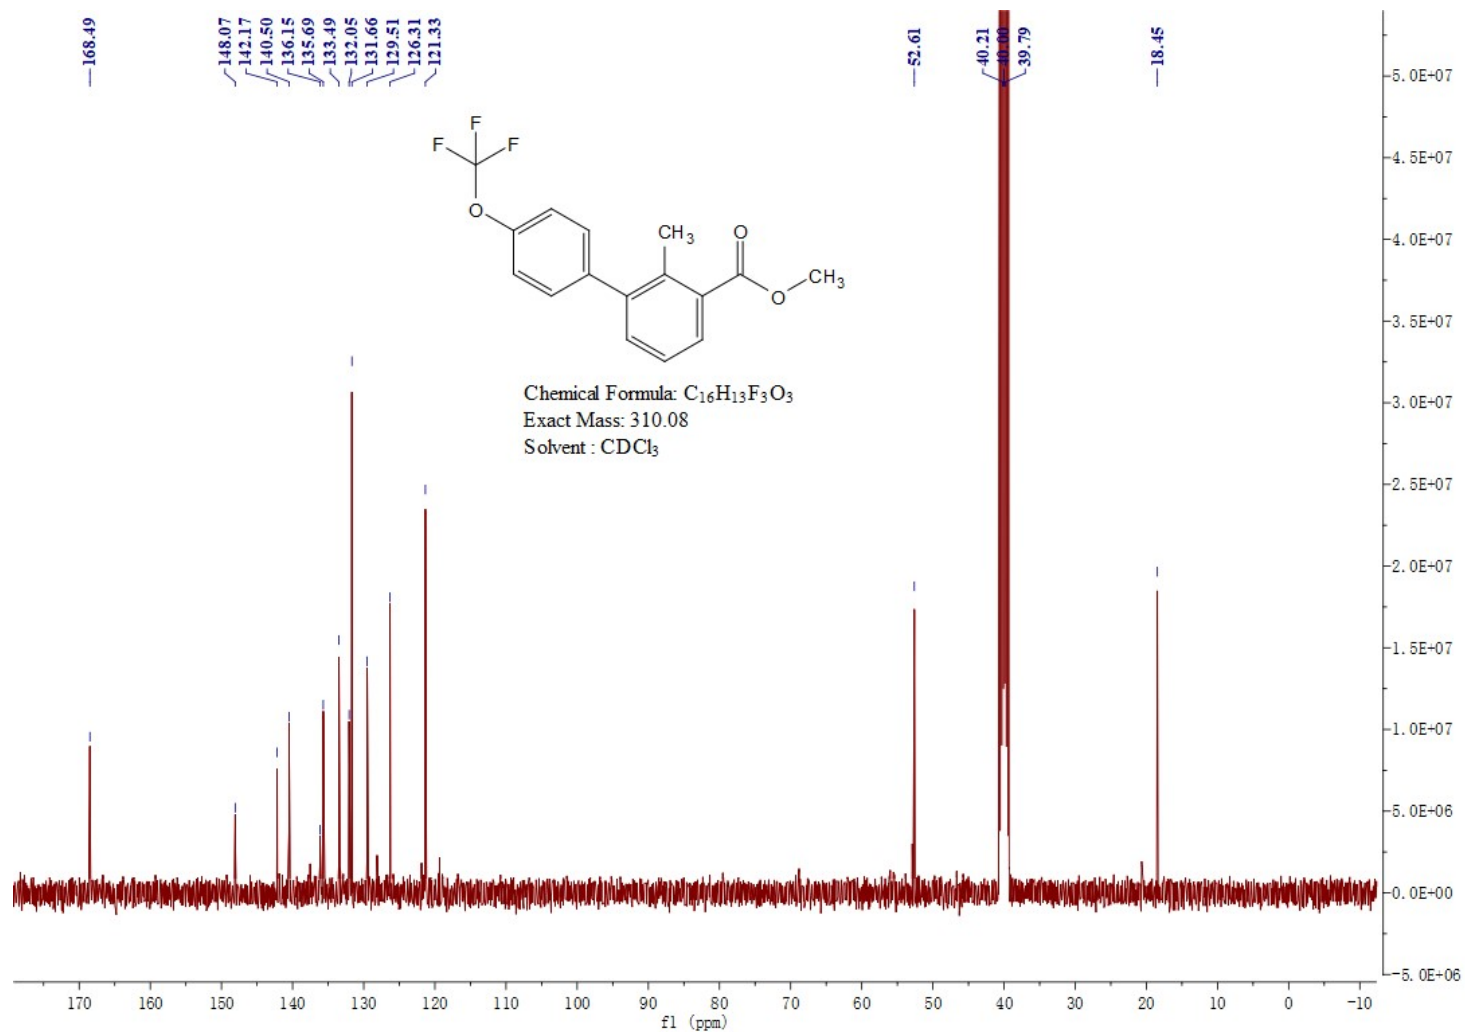

Fig. S70. The <sup>13</sup>C NMR spectrum of intermediate 2

Y30181244-I1

XEVO-G2TOF#NotSet

11-Mar-2021 10:10:58

20210683 214 (2.122) Cm (214-(686:688+694:698))

1: TOF MS ES+  
1.10e5

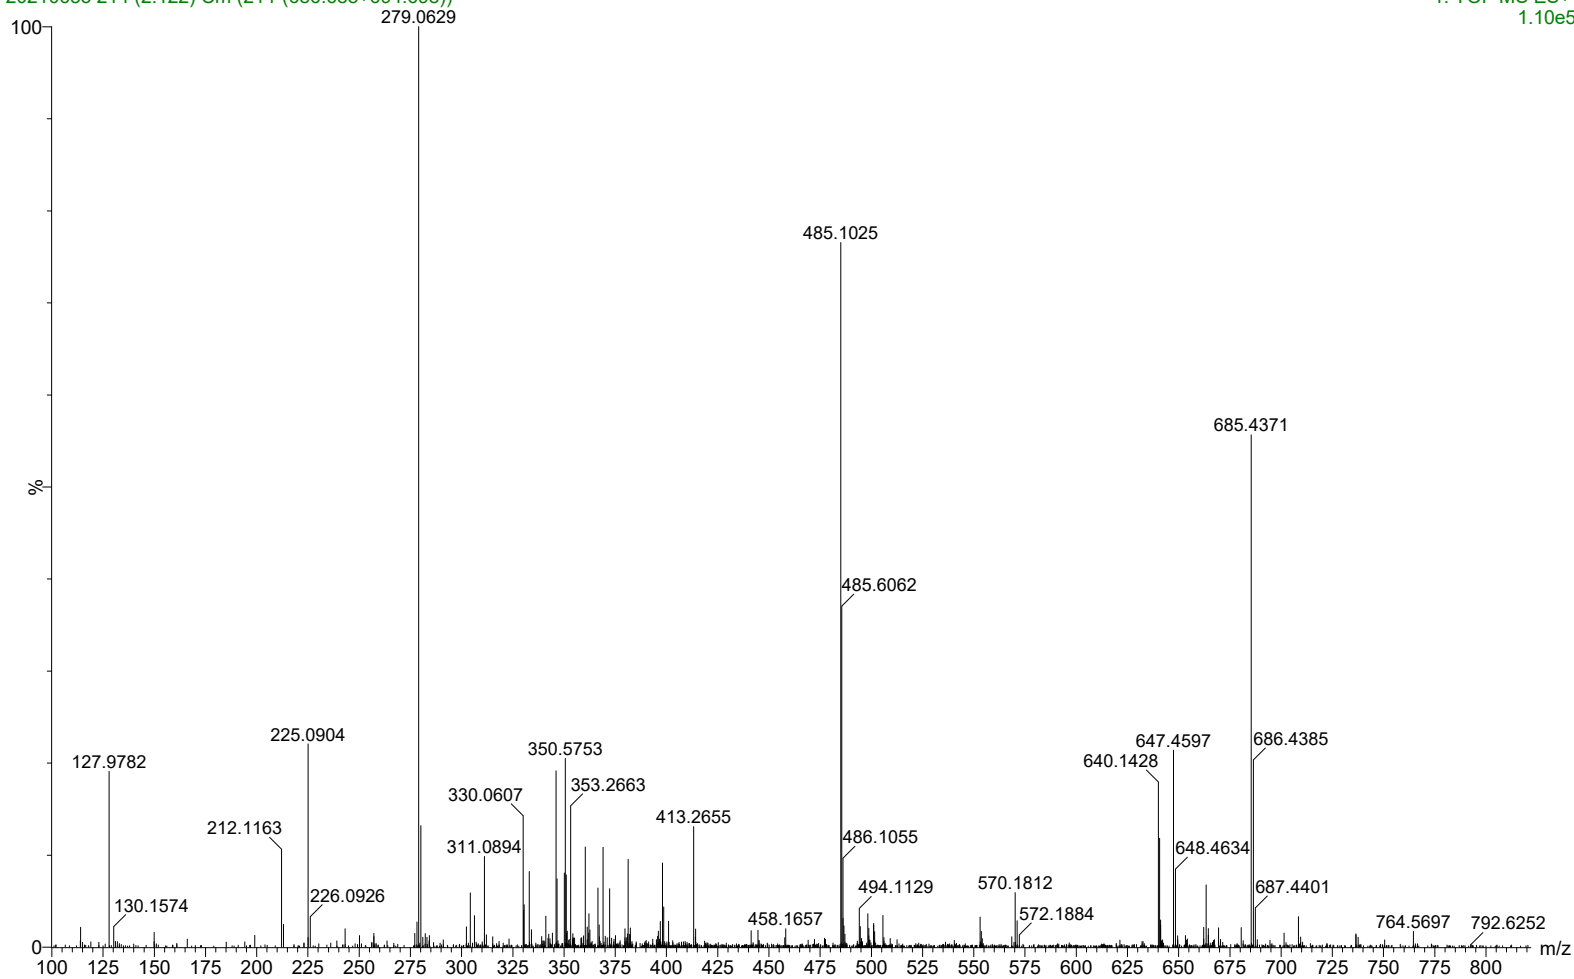

Fig. S71. The HRMS spectrum of intermediate 2

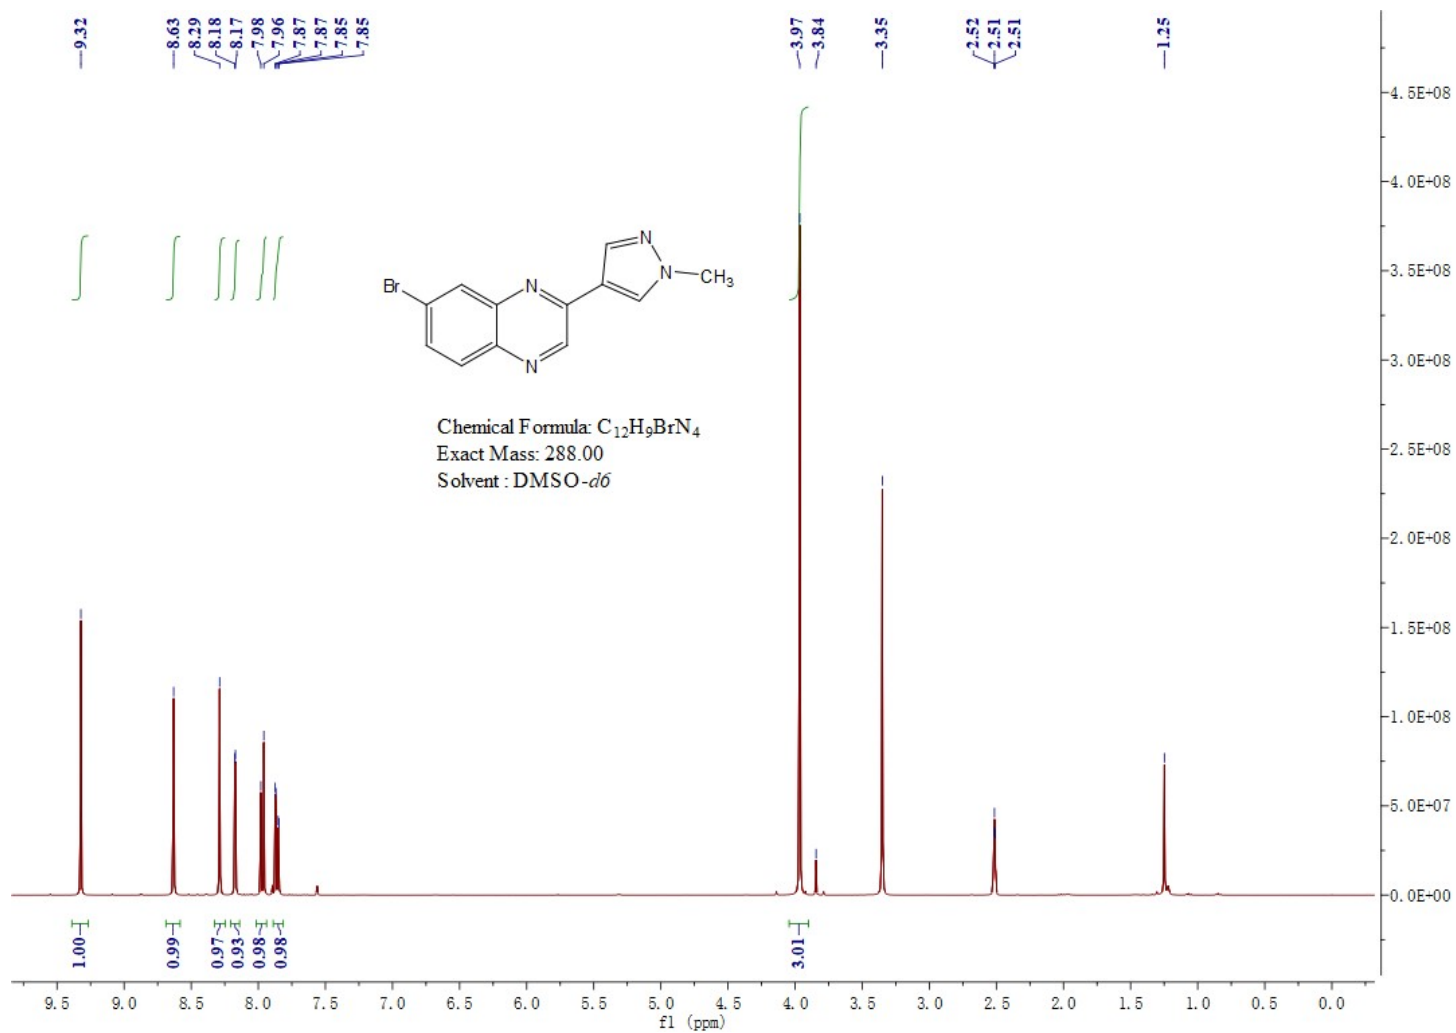

Fig. S72. The <sup>1</sup>H NMR spectrum of intermediate 3

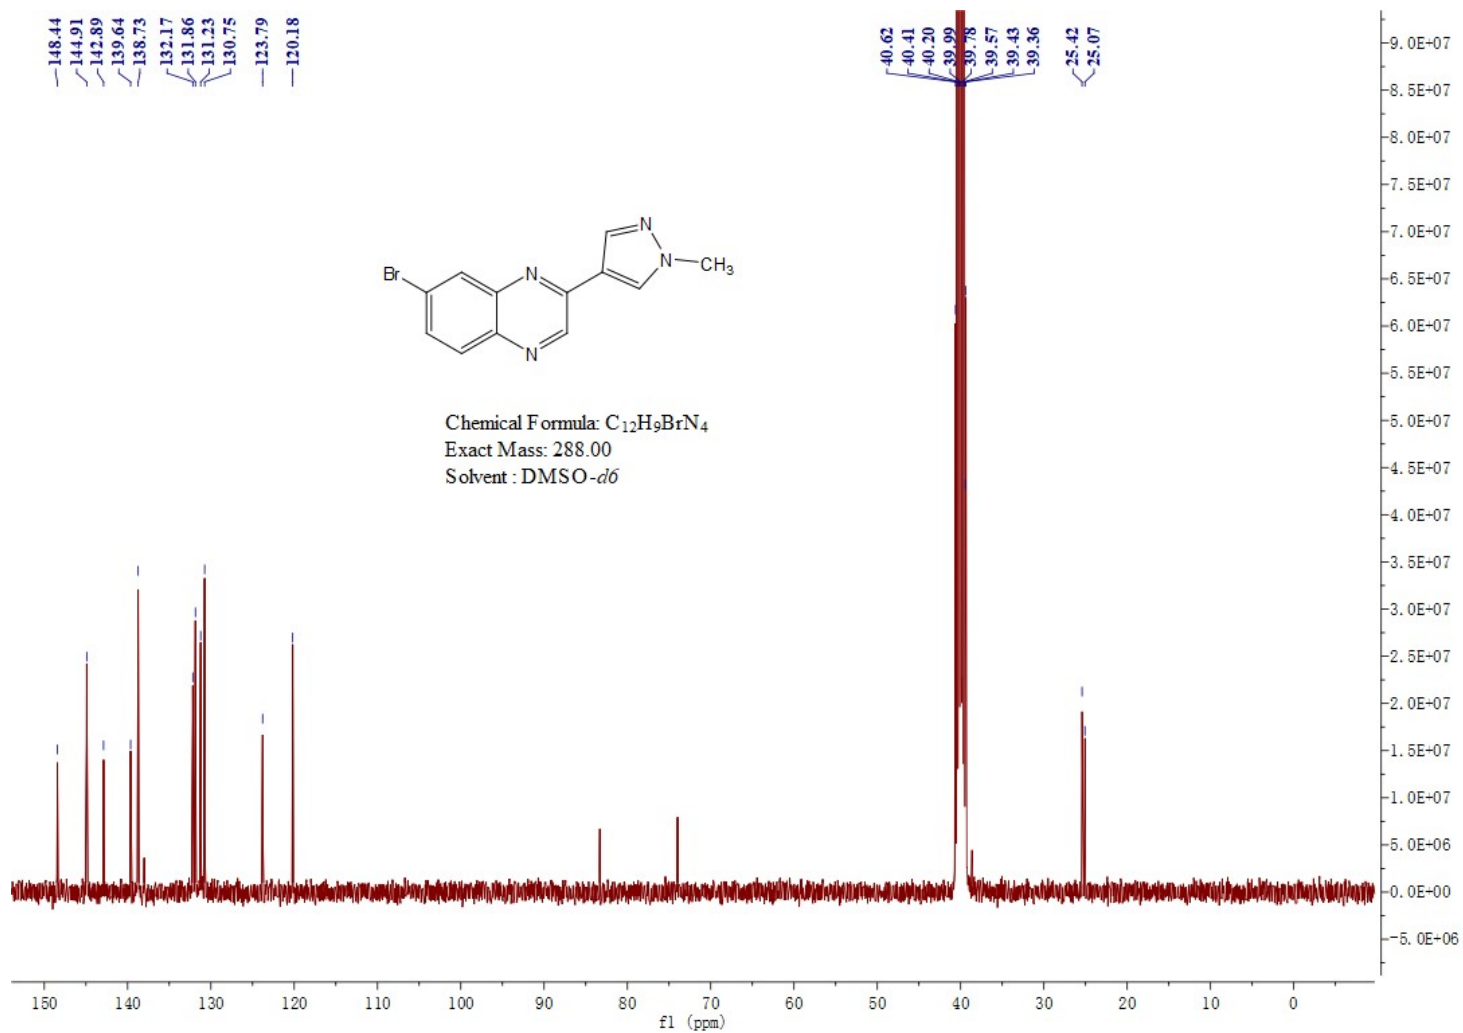

Fig. S73. The  $^{13}C$  NMR spectrum of intermediate 3



Y30181244-I14

20210687 83 (0.827) Cm (83-(588:589+592:593))

XEVO-G2TOF#NotSet

11-Mar-2021 10:54:13

1: TOF MS ES+

1.15e6

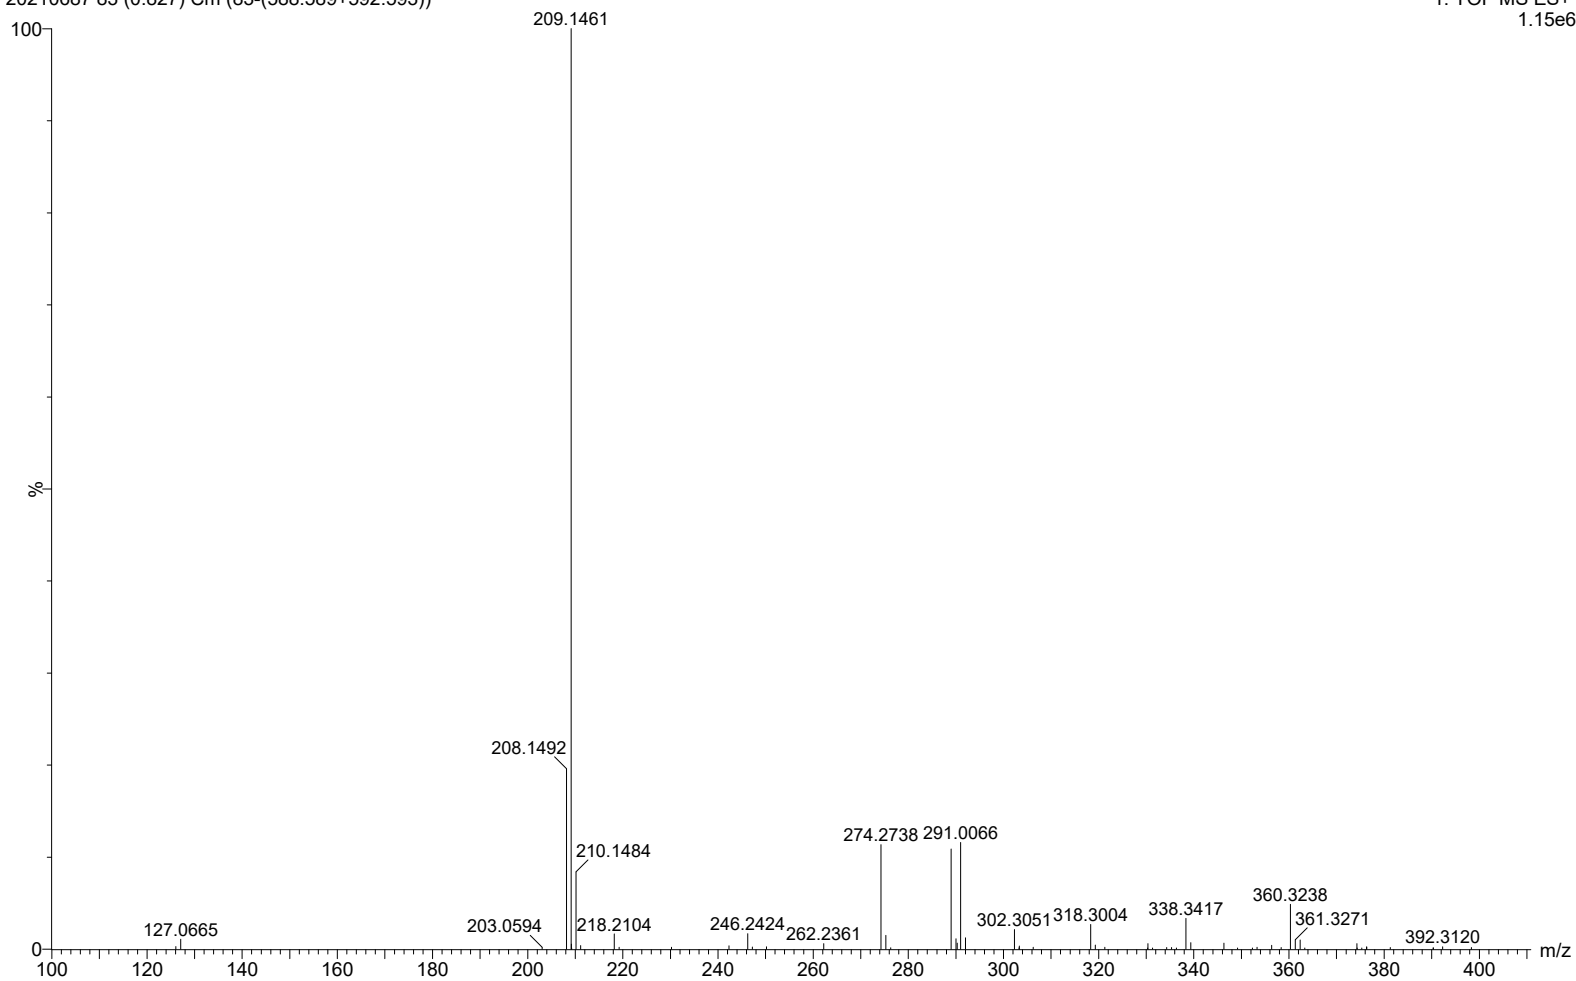

Fig. S74. The HRMS spectrum of intermediate 3

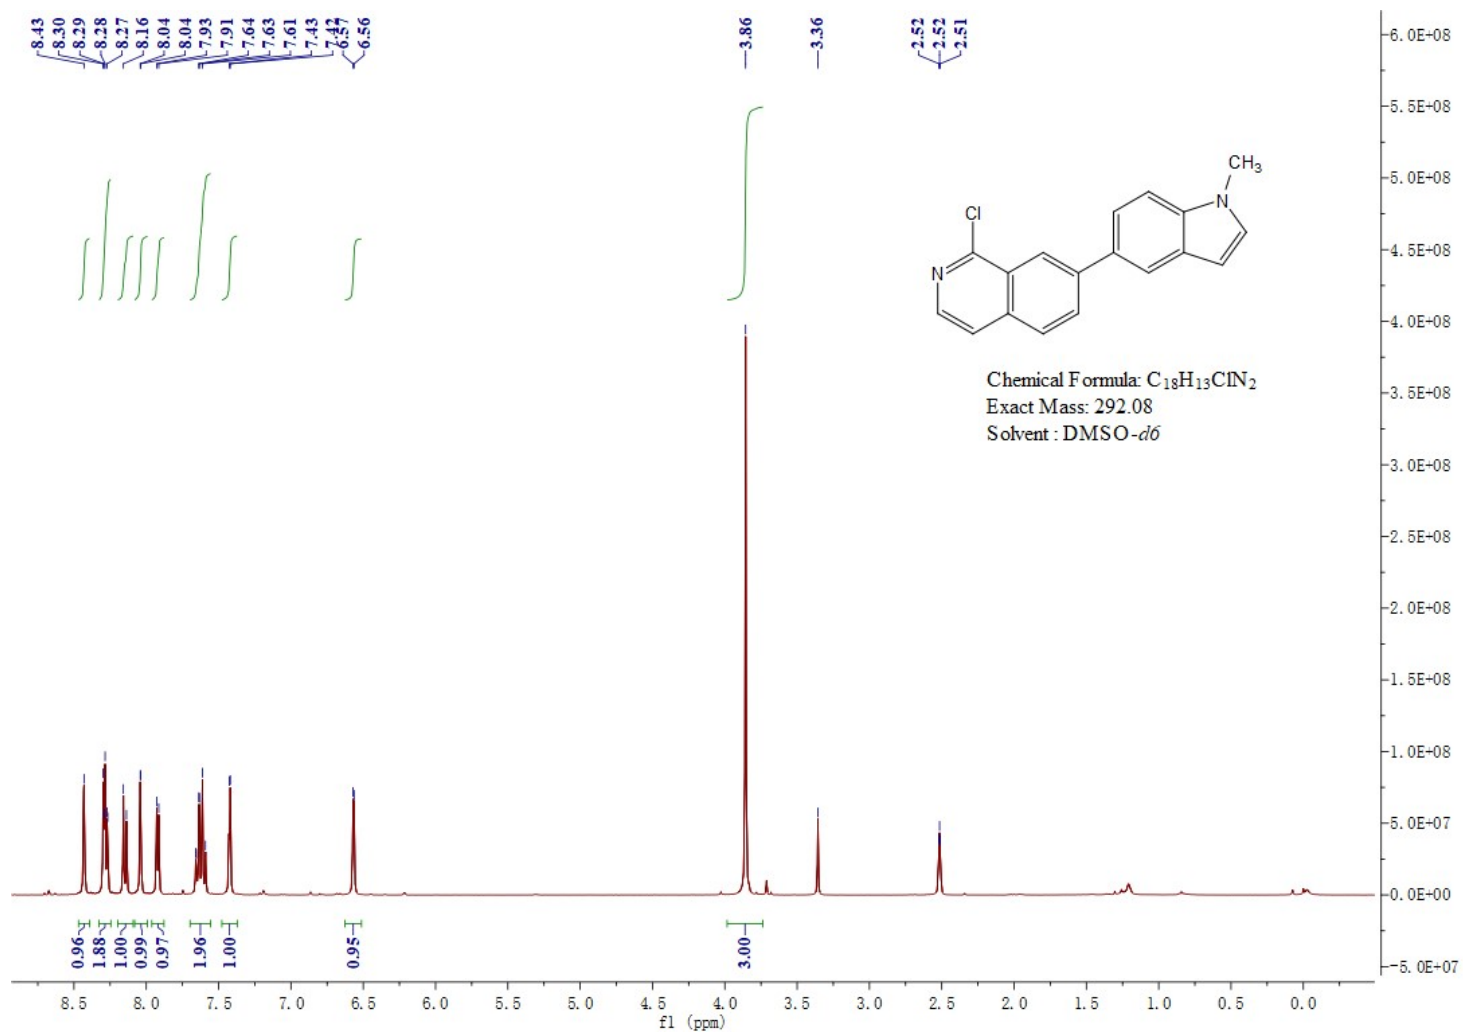

Fig. S75. The <sup>1</sup>H NMR spectrum of intermediate 4

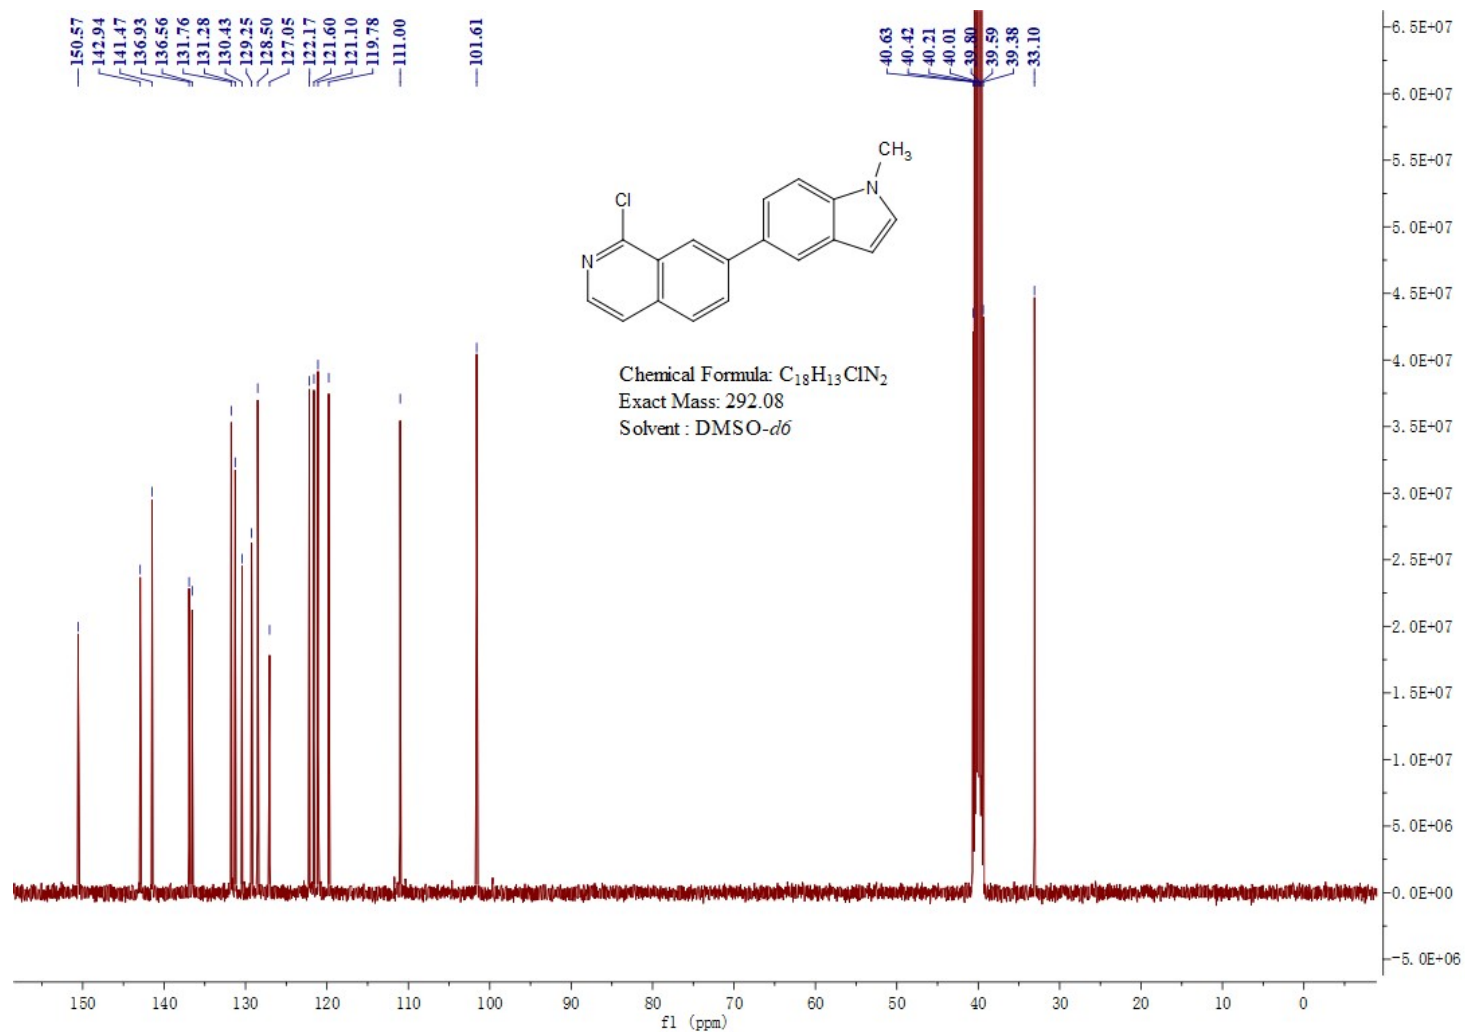

Fig. S76. The  $^{13}C$  NMR spectrum of intermediate 4

Y30181244-I6  
20210685 30 (0.314) Cm (30-(334:335+338:339))

XEVO-G2TOF#NotSet

11-Mar-2021 10:38:42  
1: TOF MS ES+  
3.94e5

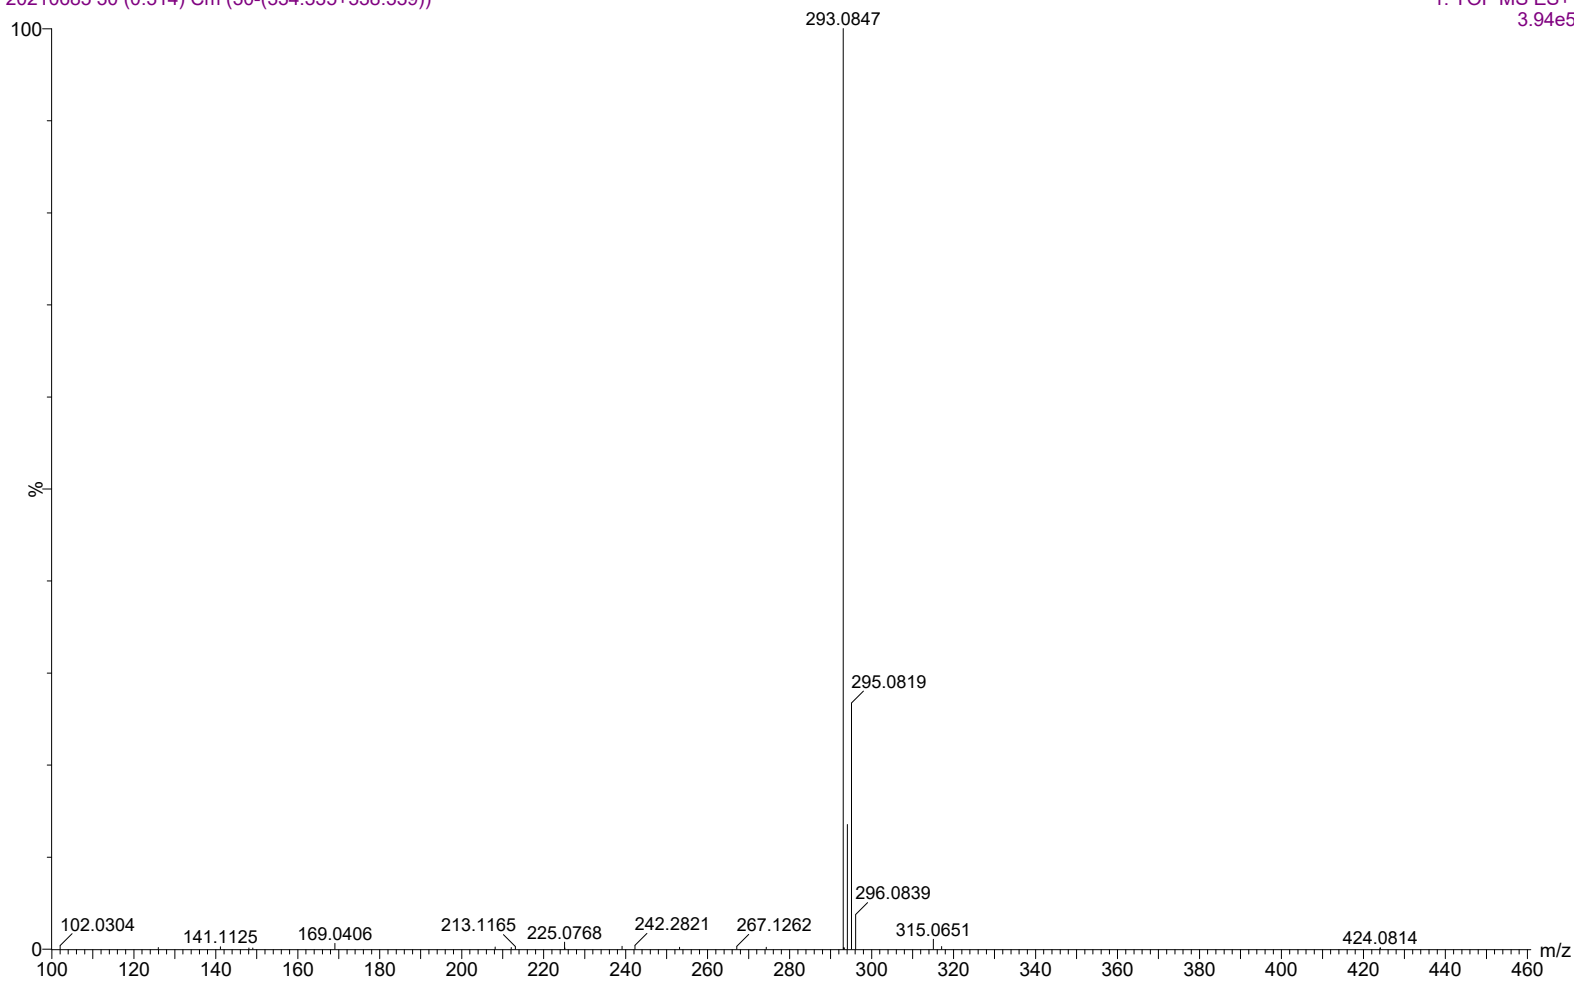

Fig. S77. The HRMS spectrum of intermediate 4

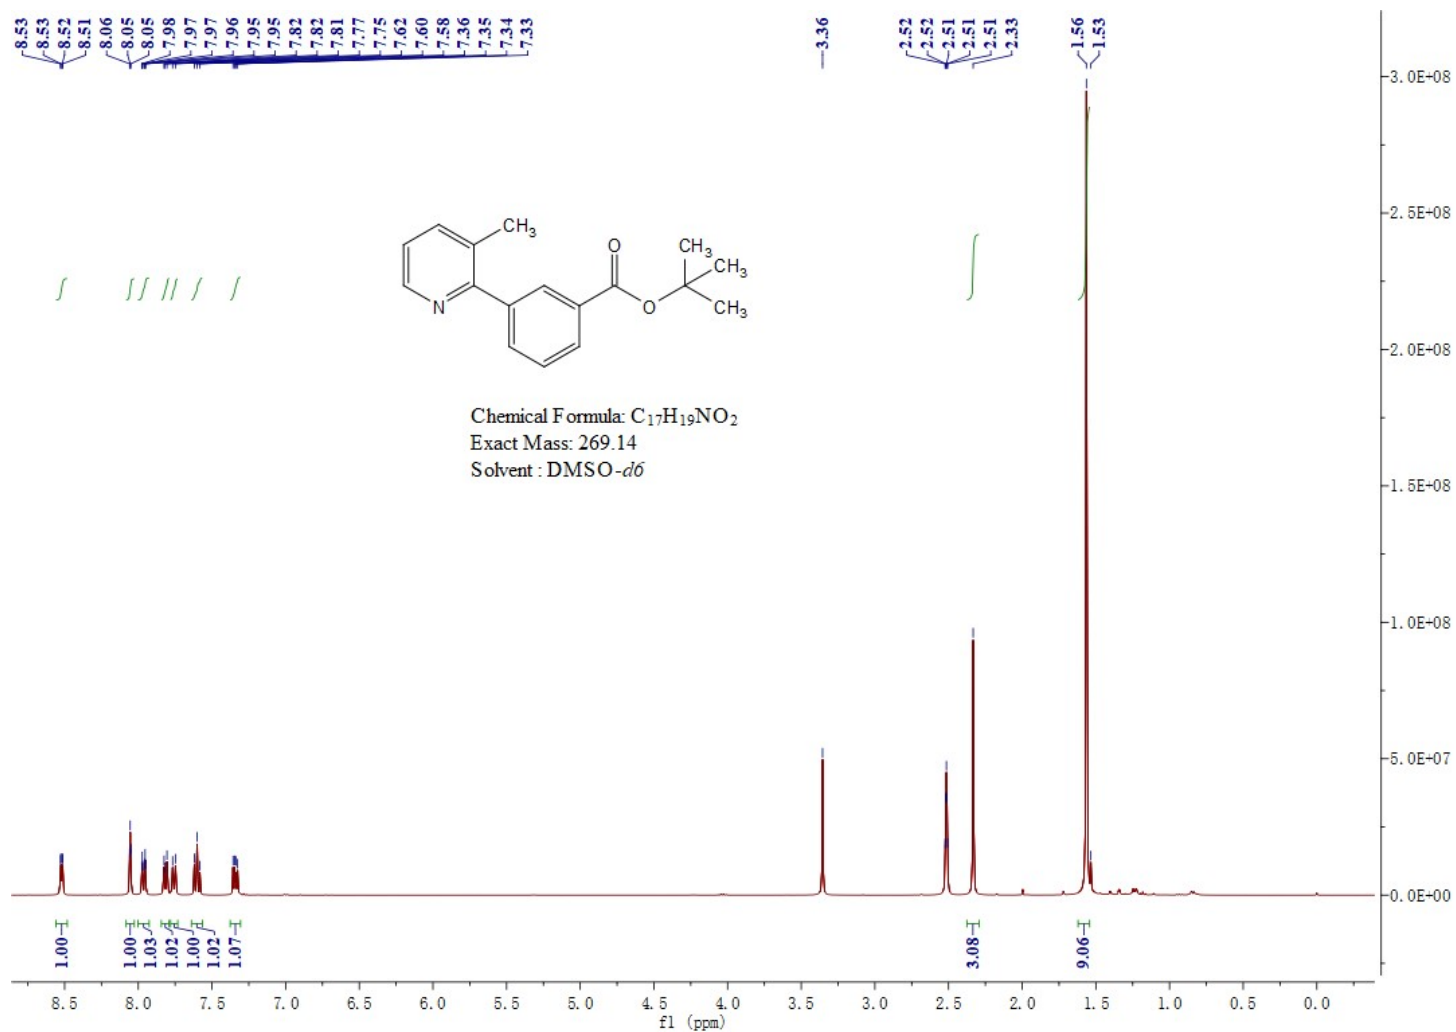

Fig. S78. The  $^1H$  NMR spectrum of intermediate 5

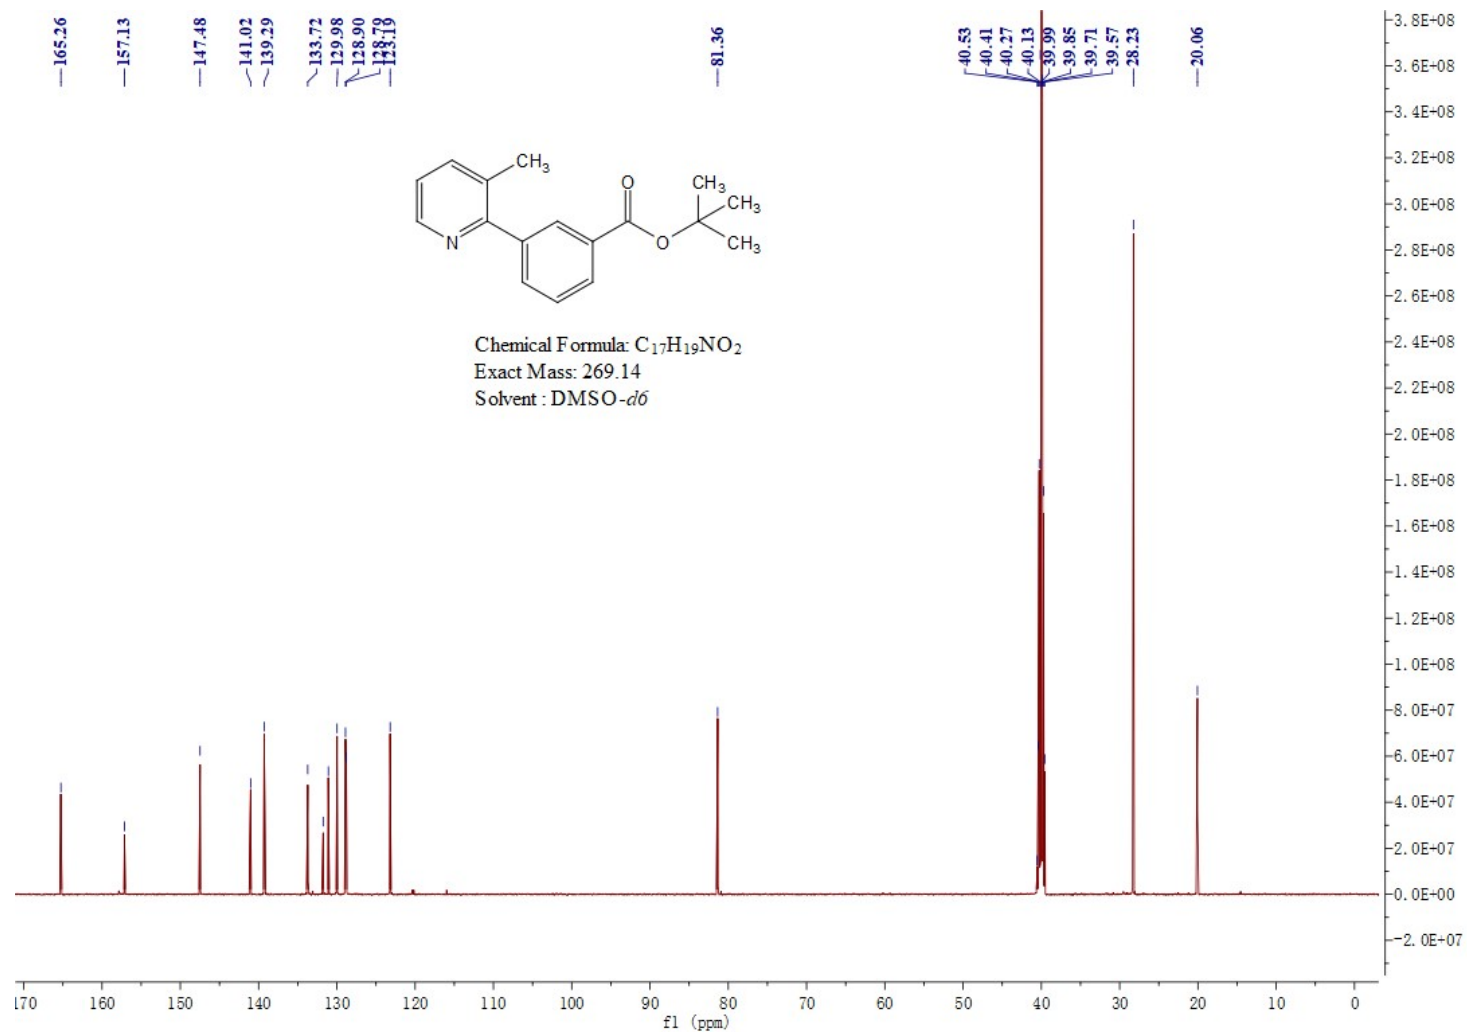

Fig. S79. The <sup>13</sup>C NMR spectrum of intermediate 5

Y30181244-118  
20210801 8 (0.105) Cm (8-(775+788))

XEVO-G2TOF#NotSet

23-Mar-202109:35:33  
1: TOF MS ES+  
7.60e5

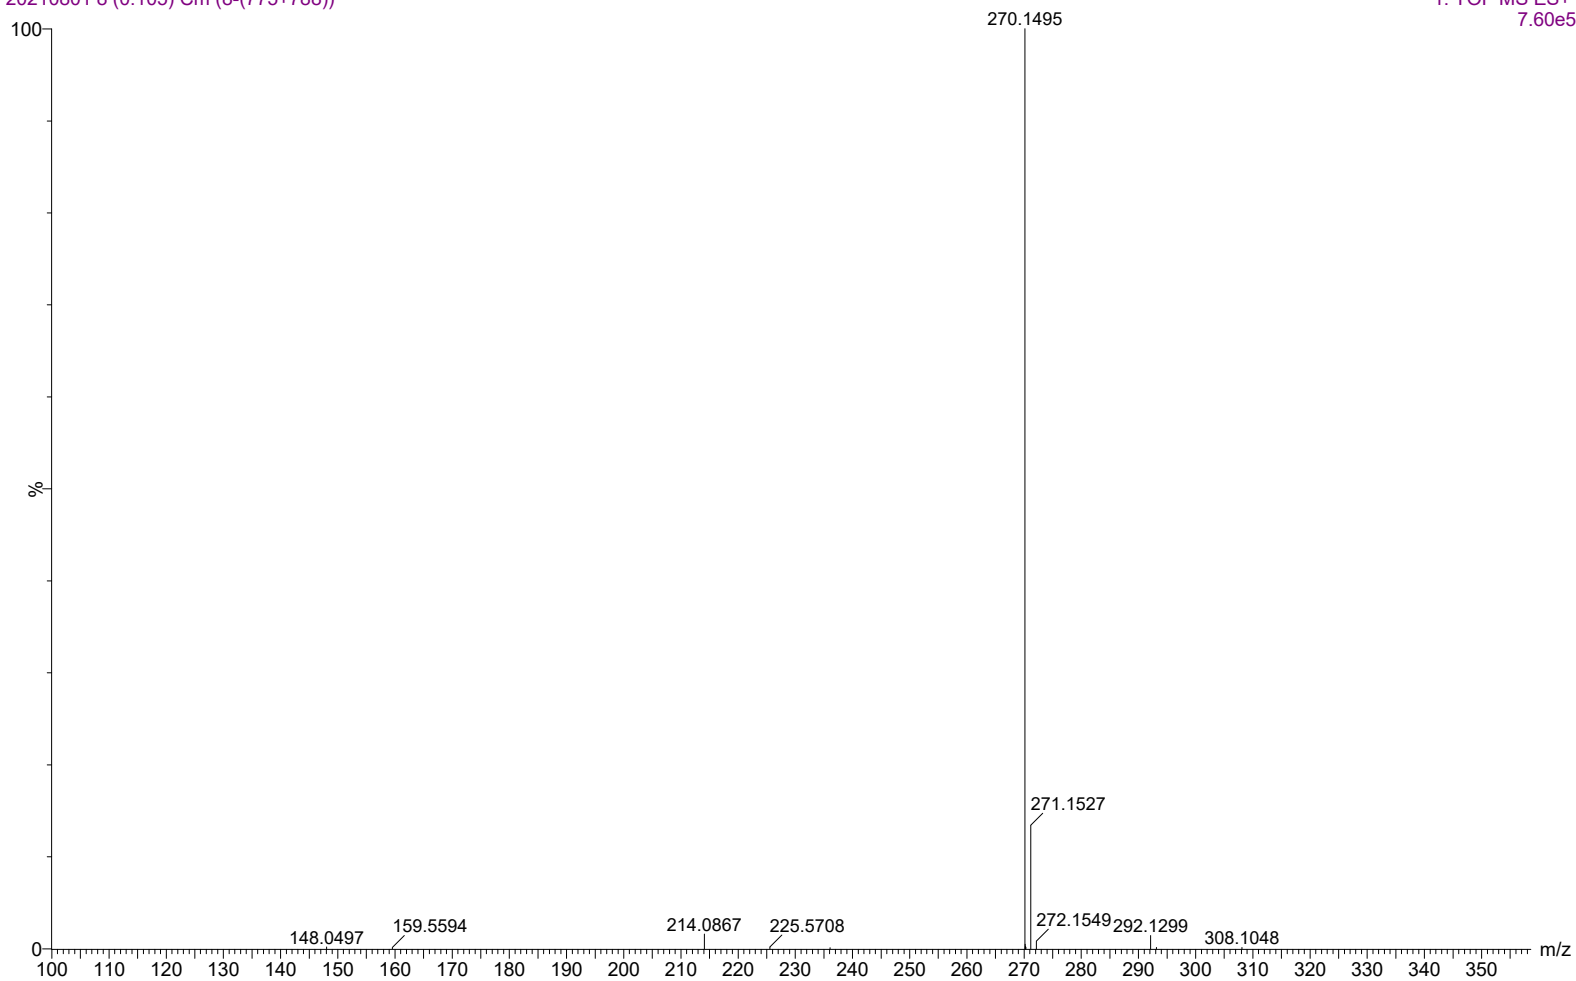

Fig. S80. The HRMS spectrum of intermediate 5

## 16. Comparison of the results obtained from Fe<sub>3</sub>O<sub>4</sub>@FSM@Pd and those reported with other Pd catalyst

**Table S2.** Performance comparison of different catalysts

| Catalyst                                                     | Reaction temperature (°C) | Solvent                                               | Base                            | Base usage | Reaction time (h) | Catalyst usage (mol %) | Yield (%) | TON  | TOF (h <sup>-1</sup> ) | Reference    |
|--------------------------------------------------------------|---------------------------|-------------------------------------------------------|---------------------------------|------------|-------------------|------------------------|-----------|------|------------------------|--------------|
| Pd(PPh <sub>3</sub> ) <sub>4</sub>                           | 120                       | DMF                                                   | K <sub>2</sub> CO <sub>3</sub>  | 2          | 18                | 0.2                    | 88        | 440  | 24.4                   | <sup>2</sup> |
| Pd(OAc) <sub>2</sub>                                         | 40                        | DMF                                                   | CS <sub>2</sub> CO <sub>3</sub> | 3          | 16                | 3                      | 90        | 30   | 1.9                    | <sup>3</sup> |
| <b>FP1@Pd</b>                                                | 100                       | H <sub>2</sub> O                                      | (i-Pr) <sub>2</sub> NH          | 2.5        | 1.5               | 1                      | 95        | 95   | 63.3                   | This work    |
| Pd/ C                                                        | Room temperature          | Me <sub>2</sub> CHOH/<br>H <sub>2</sub> O=1/1,<br>v/v | Na <sub>3</sub> PO <sub>4</sub> | 2.5        | 8                 | 2.6                    | 97        | 37.3 | 4.7                    | <sup>4</sup> |
| Fe <sub>3</sub> O <sub>4</sub> /SiO <sub>2</sub> @PDA/ Pd    | 40                        | EtOH/ H <sub>2</sub> O                                | K <sub>2</sub> CO <sub>3</sub>  | 2          | 3                 | 0.1                    | 96        | 960  | 320                    | <sup>5</sup> |
| γ-Fe <sub>2</sub> O <sub>3</sub> -acetamidine-Pd             | 100                       | DMF                                                   | Et <sub>3</sub> N               | 2          | 2                 | 0.12                   | 81        | 675  | 337.5                  | <sup>6</sup> |
| Fe <sub>3</sub> O <sub>4</sub> /P(GMA-AA-MMA)-Schiff base-Pd | 80                        | DMF/ H <sub>2</sub> O                                 | K <sub>2</sub> CO <sub>3</sub>  | 2          | 1                 | 0.1                    | 97        | 970  | 970                    | <sup>7</sup> |
| Pd@FSM                                                       | 100                       | H <sub>2</sub> O                                      | K <sub>2</sub> CO <sub>3</sub>  | 2          | 8                 | 0.05                   | 97        | 1940 | 242.5                  | <sup>8</sup> |
| <b>Fe<sub>3</sub>O<sub>4</sub>@FSM@Pd</b>                    | 100                       | H <sub>2</sub> O                                      | (i-Pr) <sub>2</sub> NH          | 2.5        | 0.5               | 0.1                    | 98        | 980  | 1960                   | This work    |
| <b>Fe<sub>3</sub>O<sub>4</sub>@FSM@Pd<sup>a</sup></b>        | 100                       | H <sub>2</sub> O                                      | (i-Pr) <sub>2</sub> NH          | 2.5        | 0.5               | 0.1                    | 98        | 980  | 1960                   | This work    |

<sup>a</sup> The catalyst Fe<sub>3</sub>O<sub>4</sub>@FSM@Pd was exposed to air for 6 months.

## 17. References

1. L. Duan, Y. Xu and X. Qian, *Chem. Comm.*, 2008, **47**, 6339-6341.
2. A. Hebel and R. Haag, *J. Org. Chem.*, 2002, **67**, 9452-9455.
3. J. H. Li, Q. M. Zhu and Y. X. Xie, *Tetrahedron*, 2006, **62**, 10888-10895.
4. G. L. Zhang, *J. Chem. Res.*, 2004, **9**, 593-595.
5. E. Farzad and H. Veisi, *J. Ind. Eng. Chem.*, 2018, **60**, 114-124.
6. S. Sobhani, M. S. Ghasemzadeh, M. Honarmand and F. Zarifi, *RSC Adv.*, 2014, **4**, 44166-44174.
7. D. Yuan, L. Chen, L. Yuan, S. Liao, M. Yang and Q. Zhang, *Chem. Eng. J.*, 2016, **287**, 241-251.
8. Q. Cai, G. Liang, Y. Xu, X. Qian and W. Zhu, *RSC Adv.*, 2016, **6**, 60996-61000.
